# Supplementary material for: Incidence and risk factors of depressive symptoms in 4 years of follow-up among mid-aged and elderly community-dwelling Chinese adults: findings from the China Health and Retirement Longitudinal Study
Source: PubMed Central journal article supplement — BMJ Open. 2019 Sep 9;9(9):e029529. doi: 10.1136/bmjopen-2019-029529 (PMC6738713; doi:10.1136/bmjopen-2019-029529), 2019-09-09
Supplement: bmjopen-2019-029529.draft_revisions.pdf [file bmjopen-2019-029529.draft_revisions.pdf]

# BMJ Open

BMJ Open is committed to open peer review. As part of this commitment we make the peer review history of every article we publish publicly available.

When an article is published we post the peer reviewers' comments and the authors' responses online. We also post the versions of the paper that were used during peer review. These are the versions that the peer review comments apply to.

The versions of the paper that follow are the versions that were submitted during the peer review process. They are not the versions of record or the final published versions. They should not be cited or distributed as the published version of this manuscript.

BMJ Open is an open access journal and the full, final, typeset and author-corrected version of record of the manuscript is available on our site with no access controls, subscription charges or pay-per-view fees (<http://bmjopen.bmj.com>).

If you have any questions on BMJ Open's open peer review process please email [info.bmjopen@bmj.com](mailto:info.bmjopen@bmj.com)

# BMJ Open

## **Incidence of depressive symptoms and prospective relationship of depressive symptoms with baseline risk factors among mid-aged and elderly community-dwelling Chinese adults**

|                               |                                                                                                                                                                                                                                                                                                                                                                                                                                                                                                                                                                                                                                                                           |
|-------------------------------|---------------------------------------------------------------------------------------------------------------------------------------------------------------------------------------------------------------------------------------------------------------------------------------------------------------------------------------------------------------------------------------------------------------------------------------------------------------------------------------------------------------------------------------------------------------------------------------------------------------------------------------------------------------------------|
| Journal:                      | <i>BMJ Open</i>                                                                                                                                                                                                                                                                                                                                                                                                                                                                                                                                                                                                                                                           |
| Manuscript ID                 | bmjopen-2019-029529                                                                                                                                                                                                                                                                                                                                                                                                                                                                                                                                                                                                                                                       |
| Article Type:                 | Research                                                                                                                                                                                                                                                                                                                                                                                                                                                                                                                                                                                                                                                                  |
| Date Submitted by the Author: | 06-Feb-2019                                                                                                                                                                                                                                                                                                                                                                                                                                                                                                                                                                                                                                                               |
| Complete List of Authors:     | Wen, Yue; West China Hospital, Sichuan University, Department of Gastrointestinal Surgery<br>Liu, Chunjuan; West China Hospital, Sichuan University, Department of Gastrointestinal Surgery<br>Liao, Jing; West China Hospital, Sichuan University, Department of Gastrointestinal Surgery<br>Yin, Yiqiong; West China Hospital, Sichuan University, Department of Gastrointestinal Surgery<br>Wu, Dongmei; University of Electronic Science and Technology of China, The Clinical Hospital of Chengdu Brain Science Institute, MOE Key Lab for Neuroinformation; The Fourth People's Hospital of Chengdu & Chengdu Mental Health Center, Psychiatric Research Laboratory |
| Keywords:                     | depressive symptoms, incidence, mid-aged and older adults, China                                                                                                                                                                                                                                                                                                                                                                                                                                                                                                                                                                                                          |
|                               |                                                                                                                                                                                                                                                                                                                                                                                                                                                                                                                                                                                                                                                                           |

SCHOLARONE™  
Manuscripts

1  
2  
3 **Incidence of depressive symptoms and prospective relationship of depressive symptoms**  
4 **with baseline risk factors among mid-aged and elderly community-dwelling Chinese adults**  
5  
6

7  
8 Yue Wen, Chunjuan Liu, Jing Liao, Yiqiong Yin\*, Dongmei Wu\*  
9

10 Correspondence should be made to:

11  
12 Dongmei Wu, PhD, RN  
13

14 Department of Nursing, The Clinical Hospital of Chengdu Brain Science Institute, MOE Key  
15

16 Lab for Neuroinformation, University of Electronic Science and Technology of China  
17

18 Huli West 1st Lane, Chengdu, Sichuan Province, China, 610036.  
19

20  
21 Tel: 86-28-69515754  
22

23  
24 E-mail: [wudongmei\\_2001@163.com](mailto:wudongmei_2001@163.com)  
25

26  
27 Yiqiong Yin, BN, RN

28 Chief Superintendent Nurse, Department of Gastrointestinal Surgery, West China Hospital,  
29

30  
31 Sichuan University  
32

33 37 Guoxue Xiang Street, Chengdu, Sichuan Province, China, 610041.  
34

35  
36 Tel: 86-28-85422877  
37

38  
39 E-mail: [yiqiong489@163.com](mailto:yiqiong489@163.com)

40 \*: Yiqiong Yin and Dongmei Wu were co-corresponding authors for this manuscript.  
41

42 The full names, institutions, city, and country of all other co-authors:  
43

44  
45 Yue Wen, BN, RN

46  
47 Supervisor Nurse, Department of Gastrointestinal Surgery, West China Hospital, Sichuan  
48

49  
50 University

51  
52 37 Guoxue Xiang Street, Chengdu, China, 610041. E-mail: [wenyue19820327@163.com](mailto:wenyue19820327@163.com)  
53

54  
55 Chunjuan Liu, BN, RN  
56

1  
2  
3 Supervisor Nurse, Department of Gastrointestinal Surgery, West China Hospital, Sichuan  
4  
5 University

6  
7  
8 37 Guoxue Xiang Street, Chengdu, China, 610041. E-mail: [liuchunjuan2002@163.com](mailto:liuchunjuan2002@163.com)

9  
10 Jing Liao, MSN, RN

11  
12 Senior Nurse, Department of Gastrointestinal Surgery, West China Hospital, Sichuan University

13  
14 37 Guoxue Xiang Street, Chengdu, China, 610041. E-mail: [m15982277765@163.com](mailto:m15982277765@163.com)

15  
16 Yiqiong Yin, BN, RN

17  
18 Chief Superintendent Nurse, Department of Gastrointestinal Surgery, West China Hospital,  
19  
20 Sichuan University

21  
22 37 Guoxue Xiang Street, Chengdu, China, 610041. E-mail: [yiqiong489@163.com](mailto:yiqiong489@163.com)

23  
24 Dongmei Wu, PhD, RN

25  
26 Assistant Professor, Department of Nursing, The Clinical Hospital of Chengdu Brain Science

27  
28 Institute, MOE Key Lab for Neuroinformation, University of Electronic Science and Technology  
29  
30 of China

31  
32 Huli West 1st Lane, Chengdu, China, 610036. Tel: 86-28-69515754. E-mail:

33  
34  
35  
36  
37  
38 [wudongmei\\_2001@163.com](mailto:wudongmei_2001@163.com)

39  
40 Word count: 5404

## Abstract

**Objectives.** The purpose of this study was to examine the incidence of depressive symptoms, and determine if baseline risk factors conferred a risk for incident depression over time in a nationally representative sample of mid-aged and elderly Chinese population.

**Design.** This study was a secondary analysis of a prospective cohort from a nationally representative sample.

**Setting.** Community samples in 28 provinces of China were recruited from the baseline survey of the China Health and Retirement Longitudinal Study. A four-stage, stratified, cluster probability sampling strategy was used, which included 10,257 households with members aged 45 years or older and their spouse.

**Participants.** A total of 11,533 participants free of depressive symptoms at baseline were identified, and 10,288 were followed in either the second or the third waves of surveys. The current analyses were conducted among the 10,288 participants.

**Primary and secondary outcome measures.** Depressive symptoms were measured by the Center for Epidemiological Studies Depression Scale short form.

**Results.** The findings showed that the incidence of depressive symptoms in a 4-year follow-up was as high as 22.3%. The incidence was higher in rural areas and women. Furthermore, longer sleeping duration and better self-perceived health status were both associated with lower risk of depressive symptoms. On contrary, having diabetes and chronic kidney disease at baseline increased the risk of depressive symptoms. However, baseline body mass index was not associated with the onset of depressive symptoms in this population.

1  
2  
3 **Conclusions.** The findings of this study highlight the importance of developing an appropriate  
4 screening test to identify depressive symptoms for those who are vulnerable and ensure these  
5 individuals can receive early interventions for depression.  
6  
7  
8  
9

10 **Key words:** depressive symptoms, incidence, mid-aged and older adults, China  
11  
12  
13  
14  
15  
16  
17  
18  
19  
20  
21  
22  
23  
24  
25  
26  
27  
28  
29  
30  
31  
32  
33  
34  
35  
36  
37  
38  
39  
40  
41  
42  
43  
44  
45  
46  
47  
48  
49  
50  
51  
52  
53  
54  
55  
56  
57  
58  
59  
60

For peer review only

### Strengths and limitations of this study

- Since the sample was representative of community-dwelling mid-aged and older Chinese adults, the study results can be generalized to mid-aged and older Chinese adults.
- This is the first study in China to estimate the incidence of depressive symptoms in a nationally representative population in China.
- Depressive symptoms were based on self-reports instead of clinically diagnosis. Therefore, information bias may be present. However, with longitudinal design, information bias in the current study was very likely to be non-differential.
- This study was a prospective analysis of baseline risk factors with depressive symptoms at follow-up, and no causal associations between these predictors and depressive symptoms can be drawn from the analysis.

## Introduction

Depression has been recognized as a leading cause of disability and a major contributor to disease burdens globally <sup>1</sup>. An estimated 322 million adults had depression in 2015 worldwide, with nearly half of these people living in the South-East Asia and Western Pacific regions <sup>2</sup>. In China, about 4.2% adult population was estimated to be depressed, and the prevalence of depression reached a peak in older adulthood <sup>2</sup>. With fast economic growth, mid-aged adults are exposed to a high-stress lifestyle, which is thought to contribute significantly to an increase in mental health disorders in susceptible people <sup>1</sup>. Older adults, on the other hand, face noteworthy challenges to their life, including loss of independence, loss of social support due to the death of a spouse or weakened family connectedness (traditionally referred to as ‘filial piety’), financial difficulties, and medical vulnerability <sup>3</sup>. Late-life depressive symptoms increase risk for significant impairment in social function <sup>3</sup>, dementia <sup>4</sup>, declined quality of life <sup>5</sup>, and suicide <sup>6</sup>. They further complicate the prognosis of concurrent medical problems by increasing physical disability and decreasing motivation and adherence to prescribed medications and/or exercise or rehabilitation programs <sup>7,8</sup>.

Although depression has come to be regarded as the common cold of psychosocial functioning in Western culture, mental disorders are still viewed as degrading not only to the patient, but also to the entire family in Chinese culture <sup>9</sup>. In addition, although effective interventions have been developed to alleviate symptoms of depression, depressive symptoms are often overlooked among the elderly, since most of them mistakenly consider these symptoms to be part of the normal ageing process <sup>10</sup>. Therefore, older adults may not actively seek medical treatment and leave their depressive symptoms undiagnosed or untreated. As persons aged 45 or older will increase from 32% to 51% of the total population from 2010 to 2040 in China <sup>11</sup>,



1  
2  
3 reliable and up-to-date estimates of the proportion of this population affected by depressive  
4 symptoms are a key ingredient of effective health policy, planning, and evaluation.  
5  
6

7  
8 Recently, a number of population-based studies have estimated prevalence of depressive  
9 symptoms among mid-aged and older Chinese adults <sup>3 10 12 13</sup>. Given that all these studies were  
10 cross-sectional, the incidence of depressive symptoms among mid-aged and older Chinese adults  
11 was not clear. Furthermore, despite a myriad of studies that examined a number of health  
12 conditions associated with an increased risk of mid- and late-life depressive symptoms, including  
13 chronic diseases, overweight/obesity, sleep duration, and self-perceived health status <sup>3 13-16</sup>, the  
14 prospective relationships between these health conditions and depressive symptoms have not  
15 been well understood in this population. Such prospective relationships may provide further  
16 evidence on how baseline conditions may be predictive of depressive symptoms in the follow-up  
17 than cross-sectional analysis, especially given that these health conditions are expected to be a  
18 great challenge to an increasing aging population, and can often co-occur with depressive  
19 symptoms which may make these conditions worse <sup>3</sup>. A better understanding of these  
20 associations may also provide information that is useful in identifying patients who are  
21 vulnerable to mid-life or late-life depressive symptoms, and proactively assessing and treating  
22 modifiable risk factors during primary health care service.  
23  
24  
25  
26  
27  
28  
29  
30  
31  
32  
33  
34  
35  
36  
37  
38  
39  
40  
41

42 Therefore, the purpose of this study was to examine the incidence of depressive  
43 symptoms among mid-aged and older adults in China, and determine if baseline sleep duration,  
44 body weight, self-perceived health status, and chronic conditions conferred a risk for incident  
45 depression over time, using baseline and four years of follow-up data from the China Health and  
46 Retirement Longitudinal Study (CHARLS).  
47  
48  
49  
50  
51  
52

### 53 **Methods**

## Study Design

This study was a secondary analysis of prospective data from the CHARLS. The CHARLS is a nationwide, community-engaged, population-based epidemiological study of Chinese adults aged 45 years or older. The purpose of the CHARLS was to obtain detailed information regarding the dynamics of retirement and how it interacts with health, health insurance, and economic well-being. The CHARLS collects detailed information on a wide range of domains, including demographics, health status, physical measures, employment history, pension insurance, retirement, income, expenditures and assets<sup>17</sup>. The current study used data from baseline, the second, and the third waves of surveys.

## Participants

The CHARLS national baseline survey was conducted in 28 provinces (Tibet, Ningxia, and Hainan were not included) across the country from May 2011 to March 2012. It was a survey of 10,257 households with members aged 45 years or older and their spouse, for a total of about 17,708 individuals. A four-stage, stratified, cluster probability sampling strategy was used to select eligible participants<sup>17</sup>. Details of the sampling procedure are published elsewhere<sup>18</sup>. The response rate for the survey was over 80% (94% in rural areas and 69% in urban areas)<sup>17</sup>. The baseline cohort of the CHARLS participants was followed up every two years with the same survey questionnaires and biomedical measures<sup>17</sup>. The second wave of the CHARLS was fielded between July 2013 and January 2014. Subjects in this study used the same inclusion and exclusion criteria as the original study. A total of 11,533 participants free of depressive symptoms at baseline were identified, of whom 9,329 were followed in the second wave of the CHARLS in 2013-2014, 9,157 were followed in the third wave survey in 2015-2016, and 10,288

1  
2  
3 were followed in either the second or the third waves of surveys. The current analyses were  
4  
5 conducted among the 10,288 participants.  
6

### 7 **Patient and Public Involvement**

8  
9  
10 In the current study, we used de-identified data from the CHARLS with no direct  
11  
12 involvement of or interaction with participants in the design, recruitment or conduct of the  
13  
14 original cohort study.  
15

### 16 **Variables, Definitions, and Measures**

17  
18  
19 **Depressive symptoms.** The Center for Epidemiological Studies Depression Scale (CES-  
20  
21 D) short form was used to measure depressive symptoms<sup>19</sup>. The CES-D short form consists of  
22  
23 ten items, and each item was rated on a four-point Likert scale with answers ranging from 0  
24  
25 (rarely or none of the time) to 3 (most or all of the time) with the total possible summary score of  
26  
27 0 to 30. The time frame for the CES-D short form refers to the week prior to interview. Item 5  
28  
29 (“feeling hopeful about the future”) and 8 (“feeling happy”) were reversely scored before  
30  
31 analysis. Higher scores corresponds to higher levels of depressive symptoms, and a score of 12  
32  
33 or higher has been used as the cut-off point for depressive symptoms<sup>20</sup>.  
34  
35  
36

37  
38 The CES-D short form has been validated among a subsample of 742 CHARLS  
39  
40 participants aged 60 years and older, showing adequate psychometric properties<sup>20</sup>.  
41  
42 Confirmatory factor analysis showed that the two-factor model had the best fit. Depressive affect  
43  
44 and somatic retardation were loaded as the first factor, and positive affect was loaded as the  
45  
46 second factor. The two-factor structure varied across both genders in multi-group analysis ( $\chi^2=$   
47  
48 144.13,  $p<0.001$ ).  $R^2$  coefficient was used to measure the reliability of each item, and some of  
49  
50 them differed between both gender groups. For example, depressive affect and somatic  
51  
52  
53  
54  
55  
56  
57  
58  
59  
60

1  
2  
3 retardation accounted for 37% and 64% of the variance in the depression indicator (“bothered”)  
4  
5 for the males and females, respectively <sup>20</sup>.

6  
7 **Measure of health conditions associated with depressive symptoms.** These factors  
8  
9 included chronic conditions, overweight/obesity, sleep duration, and self-perceived health status.  
10  
11 Information on chronic conditions was primarily based on self-reports except hypertension and  
12  
13 diabetes. Participants were asked if they had been diagnosed with any of the following health  
14  
15 conditions: arthritis, dyslipidemia, cancer (excluding minor skin cancers), liver diseases (except  
16  
17 for fatty liver, tumors or cancer), cardiovascular diseases (heart attack, coronary heart disease,  
18  
19 angina, congestive heart failure, or other heart problems), stroke, kidney disease (except for  
20  
21 cancer or tumor), stomach or other gastrointestinal diseases (except for tumor or cancer),  
22  
23 memory-related diseases, and asthma. Participants answered “yes” to these questions were  
24  
25 defined as having these doctor-diagnosed conditions.  
26  
27  
28  
29

30  
31 Hypertension was defined based on the most current guidelines from the American Heart  
32  
33 Association, which have lowered the threshold of hypertension cut-off points to 130/80 mmHg <sup>21</sup>.  
34  
35 A systolic blood pressure measurement of 130 mmHg and higher, or a diastolic measurement of  
36  
37 80 mmHg and higher, or 130/80 mmHg and higher, or taking antihypertensive medications  
38  
39 including modern western medicine, traditional Chinese medicine, or using other treatment for  
40  
41 hypertension was considered as having hypertension <sup>21</sup>. Blood pressure was measured three  
42  
43 times (approximately 45 seconds apart) for each participant on the left arm in sitting position,  
44  
45 using an electronic blood pressure monitor (Omron™ HEM-7112)<sup>22</sup>.  
46  
47  
48

49  
50 The diagnosis of diabetes was based on the current guidelines from the American  
51  
52 Diabetes Association (2018). Readings of 126 mg/dL or higher for fasting blood glucose  $\geq$ 126  
53  
54 mg/dL, or readings of 200 mg/dL or higher for random blood glucose, or readings of 6.5% or  
55

1  
2  
3 higher for glycated hemoglobin, or use of insulin, or taking oral hypoglycemic medications  
4 including traditional Chinese medicine, modern western medicine, or other diabetes treatment  
5 was considered as having diabetes <sup>23</sup>.  
6  
7

8  
9  
10 Weight was measured to the nearest 0.1 kg using a digital scale (Omron™ HN-286,  
11 Yangzhou, China) on an even, uncarpeted surface, with participants removing heavy outer  
12 clothing. Height was measured without shoes to the nearest 0.1 cm using a stadiometer  
13 (Seca™213, Hangzhou, China). Body mass index (BMI, weight in kilograms divided by height  
14 in meters squared) was calculated from the participants' weight and height.  
15  
16

17  
18  
19 Self-perceived health status is a powerful indicator of the health status of elderly people  
20  
21  
22 <sup>24</sup>. It was measured based on self-reports to the following question, “Would you rate health  
23 as...”, with five response options provided: excellent, very good, good, fair, and poor.  
24  
25

26  
27  
28 Sleep duration in hours was collected using a question, “During the past month, how  
29 many hours of actual sleep did you get at night (average hours for one night)? (This may be  
30 shorter than the number of hours you spend in bed.)”  
31  
32

33  
34  
35 **Covariates.** Factors that could confound the main association were identified a priori  
36 from current literature. Covariates included age, gender <sup>3</sup>, education <sup>25</sup>, and marital status <sup>3 26</sup>.  
37 Consistent with a prior CHARLS publication <sup>27</sup>, education was categorized as illiterate or no  
38 formal education, some primary school but can read and write, primary school including home  
39 schooling, and middle school or above. Marital status was grouped as married versus not married.  
40  
41  
42

#### 43 44 45 46 47 **Ethical Considerations**

48  
49 The CHARLS was approved by the Ethical Review Committee. The current study is a  
50 secondary analysis of the de-identified CHARLS public data. The Ethics Review Committee  
51 granted the current study exemption from review.  
52  
53  
54

## Statistical Analysis

**Incidence of depressive symptoms.** The incidence of depressive symptoms was analyzed taking into account the complex survey design and nonresponse rate in both estimates and the corresponding standard errors (SEs). Inverse probability weighting method was used to account for differential response rates. As described by the CHARLS guideline, response status (Yes or No) was first regressed on a dummy for gender, a dummy for age information, age (if known), a dummy for marital status, and a dummy for villages among all the eligible individuals in responded households. Then the inverse of the predicted probability from the regression model was calculated and rounded to one decimal<sup>28</sup>. Participants were categorized into 5-year age groups. SAS PROC SURVEYFREQ procedure was used to obtain the overall and gender specific incidence of depression among all the participants and by the 5-year age groups. In addition, overall and gender-specific depression incidence was estimated by rural and urban areas. We estimated the incidence of four outcomes of depressive symptoms: having depressive symptoms in the second wave of survey (2013-2014); having depressive symptoms in the third wave of survey (2015-2016); ever having depressive symptoms in the second or the third waves of survey; and consistently having depressive symptoms in both waves.

**Prospective analysis.** Baseline characteristics of the participants were summarized as frequency and percentage for categorical variables and mean and standard deviation or median and interquartile range for continuous variables. Associations of baseline health behaviors, including chronic conditions, overweight/obesity, sleep duration, and self-perceived health status, with the incidence of ever having depressive symptoms in 4 years of follow-up were evaluated by a multivariate logistic regression model, while controlling for all covariates as mentioned above. Odds ratios (ORs) and the corresponding 95% confidence intervals (CIs) were reported.

1  
2  
3 The SAS 9.4 (SAS Institute Inc., Cary, North Carolina) was used to perform the analyses. All the  
4  
5 p values were two-sided, and  $p < 0.05$  was considered significant.  
6

## 7 8 **Results**

### 9 10 **Sample Characteristics**

11  
12 A total of 10,288 participants aged 45 years or older were included in the estimate of  
13  
14 depressive symptoms incidence. As shown in Table 1, the average age of all participants was  
15  
16 58.5 years and roughly half participants (49.3%) were women. Most of the participants (73.3%)  
17  
18 lived in rural areas and 60.6% participants had education of primary school or above. The  
19  
20 majority of participants (90.0%) were married or living with a partner at the time of data  
21  
22 collection. About a third of the participants (31.5%) were current smokers and 17.9% were  
23  
24 current regular drinkers. Participants had an average BMI of 23.7 kg/m<sup>2</sup>. The mean duration of  
25  
26 sleep per night was 6.7 hours, and less than 20% of participants perceived their health as very  
27  
28 good or excellent. The mean CES-D short form score was 5.1 at baseline.  
29  
30  
31

### 32 33 **Incidence of Depression**

34  
35 As shown in Table 2 and in Figure 1, the incidence of ever having depressive symptoms  
36  
37 in 4 years was 22.3% (95% CI: 21.3%-23.3%). The incidence was much higher in rural areas  
38  
39 than that in urban areas (25.7% vs. 15.3%). Women had higher incidence of depressive  
40  
41 symptoms than men (27.9% vs. 16.7%). There is no clear pattern of the incidence of depressive  
42  
43 symptoms over age groups (Figure 1). The incidence was highest among the 65-70 years of age  
44  
45 group and lowest among the 45-50 years of age group.  
46  
47  
48

### 49 50 **Baseline Risk Factors And Incident Depression**

51  
52 As shown in Table 3, sleeping duration and self-perceived health status were both  
53  
54 inversely associated with the risk of depressive symptoms. Specifically, participants with an hour  
55  
56

1  
2  
3 longer of sleeping had a 10% (95% CI: 7%-13%,  $p < 0.0001$ ) lower risk of developing depressive  
4 symptoms in 4 years follow up. Compared to individuals who perceived their health status as  
5 poor, those who perceived their health status as fair, good, very good, and excellent had 42% (95%  
6 CI: 39%-52%), 47% (95% CI: 36%-57%), 64% (95% CI: 54%-72%), and 62% (95% CI: 43%-  
7 74%) lower risk of developing depressive symptoms, respectively. In addition, two chronic  
8 conditions, diabetes (OR=1.19, 95% CI: 1.00-1.42,  $p=0.04$ ) and chronic kidney disease  
9 (OR=1.37, 95% CI: 1.05-1.79,  $p=0.02$ ) were associated with higher risk of depressive symptoms.  
10 However, baseline BMI was not associated with the onset of depressive symptoms in this  
11 population (OR=0.99, 95% CI: 0.97-1.01).  
12  
13  
14  
15  
16  
17  
18  
19  
20  
21  
22  
23

## 24 Discussion

25  
26 Through analysis to data of a nationally representative sample of mid-aged and older  
27 Chinese adults, we found that the incidence of depressive symptoms in a 4-year follow-up was as  
28 high as 22.3%. Large disparities in the incidence of depressive symptoms were observed  
29 between rural and urban areas and between men and women. Furthermore, longer sleeping  
30 duration and better self-perceived health status were both associated with lower risk of  
31 depressive symptoms. On contrary, having diabetes and chronic kidney disease at baseline  
32 increased the risk of depressive symptoms. However, baseline BMI was not associated with  
33 depressive symptoms in this population.  
34  
35  
36  
37  
38  
39  
40  
41  
42  
43

44 This is the first study that examined the incidence of depressive symptoms in a nationally  
45 representative population in China. Our study found that in 4 years of follow-up, as high as 22.3%  
46 of the mid-aged and older Chinese adults developed depressive symptoms. Using the same  
47 database, a recent study reported that the prevalence of depressive symptoms at CHARLS  
48 baseline survey was up to 26.2%<sup>12</sup>. Collectively, these findings revealed that depressive  
49  
50  
51  
52  
53  
54  
55  
56  
57  
58  
59  
60



1  
2  
3 symptoms were a major public health challenge in China, and intervention programs should be  
4 developed to reduce the burden of depressive symptoms. Furthermore, large disparities were also  
5 observed between rural and urban residents and between men and women. In particular, women  
6 and residents living in rural areas were at a higher risk of developing depressive symptoms.  
7  
8  
9

10  
11  
12 Individuals with longer sleep duration had lower risk of depressive symptoms. This  
13 finding is in line with previous studies <sup>29 30</sup>. Sleep disorders are often the presenting and core  
14 symptoms of depression <sup>31</sup>. However, treatment of depression did not resolve sleep symptoms  
15 which may confer a greater risk for depression recurrence and relapse <sup>31</sup>. Therefore, sleep  
16 deprivation should be at least considered as an early indicator of depressive symptoms.  
17  
18  
19 Individuals with sleep deprivation should be aware of their high risk of depressive symptoms and  
20 manage to improve the length of their sleeping.  
21  
22  
23  
24  
25  
26  
27

28  
29 Better self-perceived health status also reduced the risk of depressive symptoms in the  
30 current study. The finding is consistent with studies among other populations <sup>32</sup>. Self-perceived  
31 health is a powerful indicator of the overall health status of elderly people <sup>24</sup>. Many factors,  
32 including sociodemographic characteristics, chronic disease, functional status, social  
33 relationships, neighborhood environment, and nutrition pattern, were all important determinants  
34 of self-perceived health <sup>24</sup>. These factors are also associated with depressive symptoms. The  
35 current study adjusted most of the factors, except for functional status, social relationship, and  
36 nutrition pattern, which were not available in the CHARLS database. Still, poorer self-perceived  
37 health status was significantly associated with higher risk of depressive symptoms. Future  
38 studies additionally controlling for those factors will help to evaluate the contribution of those  
39 factors on the associations of self-perceived health status with depressive symptoms.  
40  
41  
42  
43  
44  
45  
46  
47  
48  
49  
50  
51  
52  
53  
54  
55  
56  
57  
58  
59  
60

1  
2  
3 Furthermore, such study may also help delineate whether self-perceived health status may  
4  
5 represent other factors that may lead to depressive symptoms.  
6

7  
8 Among 12 chronic conditions, baseline chronic kidney disease increased the risk of  
9  
10 depressive symptoms at follow-up. Although the underlying mechanisms have not been well  
11  
12 understood, some authors suggested that the psychosocial and biologic changes in dialysis may  
13  
14 explain this relationship<sup>33</sup>. In addition to chronic kidney disease, baseline diabetes also  
15  
16 conferred a higher risk of symptoms of depression over time in this study. Similar results were  
17  
18 reported in a meta-analysis of 11 studies, which found that people with diabetes at baseline had a  
19  
20 24% higher risk of developing depression at follow-up compared to those without diabetes<sup>34</sup>. In  
21  
22 addition, high prevalence of depression among people with diabetes and/or chronic kidney  
23  
24 disease has also been observed in cross-sectional studies<sup>35-37</sup>. In concordance with these findings,  
25  
26 this study added further evidence in a population of mid-aged and older Chinese population that  
27  
28 compared to other chronic conditions at baseline, the two conditions were more likely to be  
29  
30 associated with depressive symptoms over time.  
31  
32  
33  
34

35 Overweight/obesity is well established to interfere with mental health, with depressive  
36  
37 symptoms being more common among overweight/obese individuals than their normal-weight  
38  
39 counterparts, especially in overweight/obese women<sup>38,39</sup>. A meta-analysis of longitudinal studies  
40  
41 further confirmed this relationship, in which excess weight at baseline increased a higher risk for  
42  
43 incident depression at follow-up<sup>40</sup>. In contrast to these findings from Western and European  
44  
45 countries, using data from a prospective survey of a large, representative sample of mid-aged and  
46  
47 elderly community-dwelling residents in Mainland China, we did not find a relationship between  
48  
49 baseline BMI and subsequent depressive symptoms over time. These inconsistent findings may  
50  
51 suggest that because participants in the current study were predominantly low in BMI at baseline  
52  
53  
54  
55  
56  
57  
58  
59  
60

1  
2  
3 (mean BMI was 23.7 kg/m<sup>2</sup>), their likelihood of experiencing depressive symptoms may have  
4  
5 been lower compared to those participants reported in Luppino et al. (2010). However, these are  
6  
7 preliminary findings that need to be further investigated in future prospective studies in this  
8  
9 population.  
10

11  
12 As the first study focused on the estimation of the incidence of depressive symptoms, the  
13  
14 study has important strengths. First, since the sample was representative of community-dwelling  
15  
16 mid-aged and older Chinese adults, the study results can be generalized to mid-aged and older  
17  
18 Chinese adults. Second, a Chinese specific cut-off point of the CES-D short form score for  
19  
20 depressive symptoms has been used, and the cut-off point was validated among middle-aged and  
21  
22 older Chinese adults<sup>20</sup>. Therefore, our study provided more reliable estimate of the incidence of  
23  
24 depressive symptoms. Third, strict quality control measures, including GPS matching, data  
25  
26 checking, recording and checking interviews, and calling back participants, were implemented at  
27  
28 every stage of the study to ensure data quality and reliability.  
29  
30  
31

32  
33 There were also some limitations in this study that should be acknowledged. First,  
34  
35 depressive symptoms were based on self-reports instead of clinically diagnosis. Therefore,  
36  
37 information bias may be present. However, with longitudinal design, information bias in the  
38  
39 current study was very likely to be non-differential. Since non-differential misclassification  
40  
41 generally bias the association estimates towards the null, our study findings were more robust.  
42  
43 Second, nighttime sleep duration was also measured based on self-reports. The use of self-  
44  
45 reported measures in the CHARLS surveys may have biased study results, since participants may  
46  
47 consistently under- or overestimate their nighttime sleep duration<sup>41</sup>. Objective or direct  
48  
49 measures of sleep duration should be used to increase precision and accuracy of self-report  
50  
51 assessment. Finally, this study was a prospective analysis of baseline risk factors with depressive  
52  
53  
54  
55  
56  
57  
58  
59  
60

1  
2  
3 symptoms at follow-up, and no causal associations between these predictors and depressive  
4  
5 symptoms can be drawn from the analysis.  
6

7  
8 The findings of the current study have important implications for clinical practice. Health  
9  
10 care professionals are especially encouraged to address the needs for better mental health in  
11  
12 elderly population <sup>42</sup>. In view of the high incidence of depressive symptoms (22.3%) among mid-  
13  
14 aged and elderly Chinese, the findings of this study highlight the importance of developing an  
15  
16 appropriate screening test to identify depressive symptoms for those who are vulnerable and  
17  
18 ensure these individuals can receive early interventions for depressive symptoms. The screening  
19  
20 test should include items such as areas of living (rural or urban areas), gender, age groups,  
21  
22 nighttime sleep duration, self-perceived health status, and certain chronic conditions, especially  
23  
24 chronic kidney disease and diabetes. In addition, intervention strategies that address short  
25  
26 nighttime sleep duration may be needed to alleviate depressive symptoms and improve mental  
27  
28 health in this population. Intervention programs should also be prioritized to target at specific  
29  
30 populations, such as women and residents living in rural areas, as these populations were at a  
31  
32 higher risk of developing depressive symptoms. Finally, new patients with chronic kidney  
33  
34 disease and diabetes may be needed to screen for depression at initial visit. Potential participants  
35  
36 with serious depressive symptoms should be referred immediately to a mental health professional.  
37  
38 Individuals with these two conditions are particularly vulnerable to the deleterious effects of  
39  
40 affective symptoms, since depression is a known risk factor for noncompliance with medical  
41  
42 treatment and adverse health outcomes <sup>43 44</sup>.  
43  
44  
45  
46  
47  
48

## 49 **Conclusions**

50  
51  
52  
53  
54  
55  
56  
57  
58  
59  
60

1  
2  
3 To conclude, our study found a high incidence of depressive symptoms in 4 years of  
4 follow-up among a nationally representative mid-aged and older Chinese population. In addition,  
5  
6 great disparities in the incidence of depressive symptoms were observed between individuals  
7  
8 lived in rural and urban areas and between men and women. Furthermore, we identified that  
9  
10 worse self-perceived health, shorter duration of sleeping, diabetes and chronic kidney disease at  
11  
12 baseline increased the risk for depressive symptoms. These findings supported the importance of  
13  
14 baseline status to longitudinal changes in depressive symptoms. Thus, interventions for  
15  
16 vulnerable mid-aged and older adults should focus on addressing short nighttime sleep duration.  
17  
18 These findings also revealed the burden of depressive symptoms in China, helped to prioritize  
19  
20 health care resources and identified individuals at higher risk for depressive symptoms, such as  
21  
22 those with chronic kidney disease and diabetes, or women and residents living in rural areas, so  
23  
24 that early interventions can be implemented to prevent depressive symptoms.  
25  
26  
27  
28  
29

### 30 **Figure Legend**

31  
32  
33 Figure 1. The Incidence of Depressive Symptoms in 4 Years of Follow-up among  
34  
35 Participants of the CHARLS  
36  
37  
38  
39  
40  
41  
42  
43  
44  
45  
46  
47  
48  
49  
50  
51  
52  
53  
54  
55  
56  
57  
58  
59  
60

### **Contributorship Statement**

All authors contribute to the conception and design of this study. YW, YY, and DW were responsible for the design, analysis, drafting and revision of this manuscript. CL and JL were responsible for interpretation of data and preparation of the manuscript.

### **Competing Interests Statement**

None declared.

### **Funding Statement**

This work was supported by the Sichuan Science and Technology Program grant number 2018JY0306 to Dr. Dongmei Wu. The CHARLS is funded by Peking University, the National Natural Science Foundation of China, the Behavioral and Social Research Division of the National Institute on Aging, and the World Bank.

### **Patient Consent for Publication**

Not required.

### **Data Sharing Statement**

The study used a public data from the CHARLS that were obtained from the CHARLS home page at <http://charls.pku.edu.cn/en>.

## References

1. Qin X, Wang S, Hsieh C. The prevalence of depression and depressive symptoms among adults in China: Estimation based on a National Household Survey. *China Economic Review* 2016 doi: 10.1016/j.chieco.2016.04.001
2. World Health Organization. Depression and other common mental disorders: Global health estimates. Geneva, Swiss: World Health Organization 2017.
3. Lei X, Sun X, Strauss J, et al. Depressive symptoms and SES among the mid-aged and elderly in China: Evidence from the China Health and Retirement Longitudinal Study national baseline. *Social Science & Medicine* 2014;120:224-32. doi: 10.1016/j.socscimed.2014.09.028 [published Online First: 2014/09/28]
4. Diniz BS, Butters MA, Albert SM, et al. Late-life depression and risk of vascular dementia and Alzheimer's disease: Systematic review and meta-analysis of community-based cohort studies. *The British journal of psychiatry : the journal of mental science* 2013;202:329-35. doi: 10.1192/bjp.bp.112.118307 [published Online First: 2013/05/03]
5. Sivertsen H, Bjørkløf GH, Engedal K, et al. Depression and quality of life in older persons: A review. *Dementia and geriatric cognitive disorders* 2015;40:311-39. doi: 10.1159/000437299
6. Wang CW, Chan CL, Yip PS. Suicide rates in China from 2002 to 2011: An update. *Social psychiatry and psychiatric epidemiology* 2014;49:929-41. doi: 10.1007/s00127-013-0789-5 [published Online First: 2013/11/19]
7. Holzapfel N, Lowe B, Wild B, et al. Self-care and depression in patients with chronic heart failure. *Heart & Lung* 2009;38:392-97. doi: 10.1016/j.hrtlng.2008.11.001 [published Online First: 2009/09/17]

- 1  
2  
3 8. Gonzalez JS, Safren SA, Delahanty LM, et al. Symptoms of depression prospectively predict  
4  
5 poorer self-care in patients with type 2 diabetes. *Diabetetic Medicine* 2008;25:1102-07.  
6  
7 doi: 10.1111/j.1464-5491.2008.02535.x [published Online First: 2009/02/03]  
8  
9
- 10 9. Zeng B, Sun W, Gary RA, et al. Towards a conceptual model of diabetes self-management  
11  
12 among Chinese immigrants in the United States. *International journal of environmental*  
13  
14 *research and public health* 2014;11:6727-42. doi: 10.3390/ijerph110706727 [published  
15  
16 Online First: 2014/07/01]  
17  
18
- 19 10. Xu Y, Yang J, Gao J, et al. Decomposing socioeconomic inequalities in depressive  
20  
21 symptoms among the elderly in China. *BMC public health* 2016;16:1214. doi:  
22  
23 10.1186/s12889-016-3876-1 [published Online First: 2016/12/03]  
24  
25
- 26 11. United Nations Department of Economic and Social Affairs/Population Division. World  
27  
28 population prospects: The 2012 revision, volume II: Demophic profiles. New York, NY:  
29  
30 United Nations 2012.  
31  
32
- 33 12. Li C, Miles T, Shen L, et al. Early-life exposure to severe famine and subsequent risk of  
34  
35 depressive symptoms in late adulthood: The China Health and Retirement Longitudinal  
36  
37 Study. *The British journal of psychiatry : the journal of mental science* 2018;213:579-86.  
38  
39 doi: 10.1192/bjp.2018.116 [published Online First: 2018/08/31]  
40  
41
- 42 13. Yu J, Li J, Cuijpers P, et al. Prevalence and correlates of depressive symptoms in Chinese  
43  
44 older adults: A population-based study. *International journal of geriatric psychiatry*  
45  
46 2012;27:305-12. doi: 10.1002/gps.2721 [published Online First: 2011/05/04]  
47  
48
- 49 14. Alvaro PK, Roberts RM, Harris JK. A systematic review assessing bidirectionality between  
50  
51 sleep disturbances, anxiety, and depression. *Sleep* 2013;36:1059-68. doi:  
52  
53 10.5665/sleep.2810 [published Online First: 2013/07/03]  
54  
55



- 1  
2  
3 15. Wilson-Genderson M, Heid AR, Pruchno R. Onset of multiple chronic conditions and  
4  
5 depressive symptoms: A life events perspective. *Innovation in Aging* 2017;1:igx022-  
6  
7 igx22. doi: 10.1093/geroni/igx022  
8  
9
- 10 16. Qian J, Li N, Ren X. Obesity and depressive symptoms among Chinese people aged 45 and  
11  
12 over. *Scientific reports* 2017;7:45637. doi: 10.1038/srep45637  
13  
14
- 15 17. Zhao Y, Hu Y, Smith JP, et al. Cohort profile: The China Health and Retirement  
16  
17 Longitudinal Study (CHARLS). *International journal of epidemiology* 2014;43:61-68.  
18  
19 doi: 10.1093/ije/dys203 [published Online First: 2012/12/18]  
20  
21
- 22 18. Li C, Liu T, Sun W, et al. Prevalence and risk factors of arthritis in a middle-aged and older  
23  
24 Chinese population: The China Health and Retirement Longitudinal Study.  
25  
26 *Rheumatology (Oxford, England)* 2015;54:697-706. doi: 10.1093/rheumatology/keu391  
27  
28 [published Online First: 2014/10/08]  
29  
30
- 31 19. Andresen EM, Malmgren JA, Carter WB, et al. Screening for depression in well older adults:  
32  
33 Evaluation of a short form of the CES-D (Center for Epidemiologic Studies Depression  
34  
35 Scale). *American journal of preventive medicine* 1994;10(2):77-84. [published Online  
36  
37 First: 1994/03/01]  
38  
39
- 40 20. Chen H, Mui AC. Factorial validity of the Center for Epidemiologic Studies Depression  
41  
42 Scale short form in older population in China. *International psychogeriatrics / IPA*  
43  
44 2014;26:49-57. doi: 10.1017/s1041610213001701 [published Online First: 2013/10/16]  
45  
46
- 47 21. Whelton PK, Carey RM, Aronow WS, et al. 2017  
48  
49 ACC/AHA/AAPA/ABC/ACPM/AGS/APhA/ASH/ASPC/NMA/PCNA guideline for the  
50  
51 prevention, detection, evaluation, and management of high blood pressure in adults: A  
52  
53 report of the American College of Cardiology/American Heart Association Task Force on  
54  
55

- 1  
2  
3 Clinical Practice Guidelines. *Journal of the American College of Cardiology*  
4  
5 2018;71:e127-e248. doi: 10.1016/j.jacc.2017.11.006 [published Online First: 2017/11/18]  
6  
7  
8 22. Zhao Y, Crimmins E, Hu P, et al. China Health And Retirement Longitudinal Study: 2011-  
9  
10 2012 national baseline blood data users' guide. Beijing, China: China Center for  
11  
12 Economic Research, Peking Universtiy 2014.  
13  
14  
15 23. American Diabetes Association. 2. Classification and diagnosis of diabetes: Standards of  
16  
17 medical care in diabetes-2018. *Diabetes care* 2018;41:S13-S27. doi: 10.2337/dc18-S002  
18  
19 [published Online First: 2017/12/10]  
20  
21  
22 24. Machón M, Vergara I, Dorronsoro M, et al. Self-perceived health in functionally independent  
23  
24 older people: Associated factors. *BMC geriatrics* 2016;16:66. doi: 10.1186/s12877-016-  
25  
26 0239-9 [published Online First: 2016/03/11]  
27  
28  
29 25. Bjelland I, Krokstad S, Mykletun A, et al. Does a higher educational level protect against  
30  
31 anxiety and depression? The HUNT study. *Social science & medicine (1982)*  
32  
33 2008;66:1334-45. doi: 10.1016/j.socscimed.2007.12.019 [published Online First:  
34  
35 2008/02/01]  
36  
37  
38 26. Cheng HG, Chen S, McBride O, et al. Prospective relationship of depressive symptoms,  
39  
40 drinking, and tobacco smoking among middle-aged and elderly community-dwelling  
41  
42 adults: Results from the China Health and Retirement Longitudinal Study (CHARLS).  
43  
44 *Journal of affective disorders* 2016;195:136-43. doi: 10.1016/j.jad.2016.02.023  
45  
46 [published Online First: 2016/02/20]  
47  
48  
49 27. Zuo M, Gan C, Liu T, et al. Physical predictors of cognitive function in individuals with  
50  
51 hypertension: Evidence from the CHARLS baseline survey. *Western journal of nursing*  
52  
53 *research* 2018 doi: 10.1177/0193945918770794 [published Online First: 2018/05/11]  
54  
55  
56  
57  
58  
59  
60

- 1  
2  
3 28. Zhao Y, Strauss J, Yang G, et al. China Health and Retirement Longitudinal Study-2011-  
4  
5 2012 national baseline users's guide. Beijing, China: Peking University 2013.  
6  
7  
8 29. Sun Y, Shi L, Bao Y, et al. The bidirectional relationship between sleep duration and  
9  
10 depression in community-dwelling middle-aged and elderly individuals: Evidence from a  
11  
12 longitudinal study. *Sleep medicine* 2018;52:221-29. doi: 10.1016/j.sleep.2018.03.011  
13  
14 [published Online First: 2018/06/05]  
15  
16  
17 30. Li Y, Wu Y, Zhai L, et al. Longitudinal association of sleep duration with depressive  
18  
19 symptoms among middle-aged and older Chinese. *Scientific reports* 2017;7:11794. doi:  
20  
21 10.1038/s41598-017-12182-0 [published Online First: 2017/09/20]  
22  
23  
24 31. Nutt D, Wilson S, Paterson L. Sleep disorders as core symptoms of depression. *Dialogues in*  
25  
26 *clinical neuroscience* 2008;10(3):329-36. [published Online First: 2008/11/05]  
27  
28  
29 32. Cole MG, Dendukuri N. Risk factors for depression among elderly community subjects: A  
30  
31 systematic review and meta-analysis. *American Journal of Psychiatry* 2003;160:1147-56.  
32  
33 doi: 10.1176/appi.ajp.160.6.1147 [published Online First: 2003/06/05]  
34  
35  
36 33. Sonikian M, Metaxaki P, Papavasileiou D, et al. Effects of interleukin-6 on depression risk in  
37  
38 dialysis patients. *American journal of nephrology* 2010;31:303-08. doi:  
39  
40 10.1159/000285110 [published Online First: 2010/02/18]  
41  
42  
43 34. Nouwen A, Winkley K, Twisk J, et al. Type 2 diabetes mellitus as a risk factor for the onset  
44  
45 of depression: A systematic review and meta-analysis. *Diabetologia* 2010;53:2480-86.  
46  
47 doi: 10.1007/s00125-010-1874-x [published Online First: 2010/08/17]  
48  
49  
50 35. Anderson RJ, Freedland KE, Clouse RE, et al. The prevalence of comorbid depression in  
51  
52 adults with diabetes: A meta-analysis. *Diabetes care* 2001;24(6):1069-78. [published  
53  
54 Online First: 2001/05/26]  
55  
56

- 1  
2  
3 36. Palmer S, Vecchio M, Craig JC, et al. Prevalence of depression in chronic kidney disease:  
4  
5 Systematic review and meta-analysis of observational studies. *Kidney international*  
6  
7 2013;84:179-91. doi: 10.1038/ki.2013.77 [published Online First: 2013/03/15]  
8  
9
- 10 37. Roy T, Lloyd CE. Epidemiology of depression and diabetes: A systematic review. *Journal of*  
11  
12 *affective disorders* 2012;142 Suppl:S8-S21. doi: 10.1016/s0165-0327(12)70004-6  
13  
14 [published Online First: 2012/10/25]  
15  
16
- 17 38. Atlantis E, Baker M. Obesity effects on depression: Systematic review of epidemiological  
18  
19 studies. *International journal of obesity (2005)* 2008;32:881-91. doi: 10.1038/ijo.2008.54  
20  
21 [published Online First: 2008/04/17]  
22  
23
- 24 39. de Wit L, Luppino F, van Straten A, et al. Depression and obesity: A meta-analysis of  
25  
26 community-based studies. *Psychiatry research* 2010;178:230-35. doi:  
27  
28 10.1016/j.psychres.2009.04.015 [published Online First: 2010/05/14]  
29  
30
- 31 40. Luppino FS, de Wit LM, Bouvy PF, et al. Overweight, obesity, and depression: A systematic  
32  
33 review and meta-analysis of longitudinal studies. *Archives of general psychiatry*  
34  
35 2010;67:220-29. doi: 10.1001/archgenpsychiatry.2010.2 [published Online First:  
36  
37 2010/03/03]  
38  
39
- 40 41. Li J, Cacchione PZ, Hodgson N, et al. Afternoon napping and cognition in Chinese older  
41  
42 adults: Findings from the China Health and Retirement Longitudinal Study Baseline  
43  
44 Assessment. *Journal of the American Geriatrics Society* 2017;65:373-80. doi:  
45  
46 10.1111/jgs.14368 [published Online First: 2016/12/21]  
47  
48
- 49 42. Avasthi A, Grover S. Clinical practice guidelines for management of depression in elderly.  
50  
51 *Indian journal of psychiatry* 2018;60:S341-S62. doi: 10.4103/0019-5545.224474  
52  
53 [published Online First: 2018/03/15]  
54  
55  
56  
57  
58  
59  
60

- 1  
2  
3 43. Zhang Y, Ting RZ, Yang W, et al. Depression in Chinese patients with type 2 diabetes:  
4  
5 Associations with hyperglycemia, hypoglycemia, and poor treatment adherence. *Journal*  
6  
7 *of diabetes* 2015;7:800-8008. doi: 10.1111/1753-0407.12238 [published Online First:  
8  
9 2014/10/29]  
10  
11  
12 44. Fischer MJ, Kimmel PL, Greene T, et al. Elevated depressive affect is associated with  
13  
14 adverse cardiovascular outcomes among African Americans with chronic kidney disease.  
15  
16 *Kidney international* 2011;80:670-78. doi: 10.1038/ki.2011.153 [published Online First:  
17  
18 2011/06/03]  
19  
20  
21  
22  
23  
24  
25  
26  
27  
28  
29  
30  
31  
32  
33  
34  
35  
36  
37  
38  
39  
40  
41  
42  
43  
44  
45  
46  
47  
48  
49  
50  
51  
52  
53  
54  
55  
56  
57  
58  
59  
60

## Tables

**Table 1. Baseline characteristics of the CHARLS participants free of depressive symptoms**

| Variable                                       | Distribution   |
|------------------------------------------------|----------------|
| N                                              | 10,288         |
| age, years, mean (SD)                          | 58.5 (9.8)     |
| Male, n (%)                                    | 5845 (50.7%)   |
| Living in rural areas, n (%)                   | 8,440 (73.3%)  |
| Education, n (%)                               |                |
| <i>No formal education or illiterate</i>       | 2,736 (23.7%)  |
| <i>Some primary school</i>                     | 1,804 (15.7%)  |
| <i>Finished primary school</i>                 | 2,590 (22.5%)  |
| <i>Junior high school or above</i>             | 4,394 (38.1%)  |
| Currently married, n (%)                       | 10,375 (90.0%) |
| Smoking status, n (%)                          |                |
| <i>Current smoker</i>                          | 3,629 (31.5%)  |
| <i>Former smoker</i>                           | 1,034 (9.0%)   |
| <i>Never smoking</i>                           | 6,868 (60.0%)  |
| Drinking status, n (%)                         |                |
| <i>Regular drinkers</i>                        | 1,951 (17.9%)  |
| <i>Occasional drinkers</i>                     | 476 (4.4%)     |
| <i>Former drinkers</i>                         | 646 (5.9%)     |
| <i>Never drinking</i>                          | 7,833 (71.8%)  |
| Weight, kg, mean (SD)                          | 60 (11.8)      |
| Height, m, mean (SD)                           | 1.6 (0.1)      |
| Body mass index, kg/m <sup>2</sup> , mean (SD) | 23.7 (4)       |
| Sleeping duration, hours, mean (SD)            | 6.7 (1.7)      |
| CES-D short form score                         | 5.1 (3.3)      |
| Self-perceived health status, n (%)            |                |
| <i>Excellent</i>                               | 483 (4.2%)     |
| <i>Very good</i>                               | 1,744 (15.1%)  |
| <i>Good</i>                                    | 4,136 (35.9%)  |
| <i>Fair</i>                                    | 3,977 (34.5%)  |
| <i>Poor</i>                                    | 1,187 (10.3%)  |
| Chronic conditions, n (%)                      |                |
| <i>Hypertension</i>                            | 4,045 (40.3%)  |
| <i>Dyslipidemia</i>                            | 1,016 (9.0%)   |
| <i>Diabetes</i>                                | 1,210 (15.0%)  |
| <i>Cancer</i>                                  | 97 (0.8%)      |
| <i>Liver disease</i>                           | 387 (3.4%)     |
| <i>Heart disease</i>                           | 1,162 (10.1%)  |
| <i>Stroke</i>                                  | 188 (1.6%)     |
| <i>Kidney disease</i>                          | 563 (4.9%)     |

|   |                                 |               |
|---|---------------------------------|---------------|
| 1 |                                 |               |
| 2 |                                 |               |
| 3 | <i>Gastrointestinal disease</i> | 2,180 (18.9%) |
| 4 | <i>Dementia</i>                 | 105 (0.9%)    |
| 5 | <i>Arthritis</i>                | 3,221 (28.0%) |
| 6 | <i>Asthma</i>                   | 312 (2.7%)    |
| 7 |                                 |               |

8 *Note.* CES-D=Center for Epidemiologic Study of Depression short form; SD=standard deviation.  
9

10  
11  
12  
13  
14  
15  
16  
17  
18  
19  
20  
21  
22  
23  
24  
25  
26  
27  
28  
29  
30  
31  
32  
33  
34  
35  
36  
37  
38  
39  
40  
41  
42  
43  
44  
45  
46  
47  
48  
49  
50  
51  
52  
53  
54  
55  
56  
57  
58  
59  
60

For peer review only

**Table 2. Incidence of depressive symptoms among the CHARLS participants**

|         | Ever having depressive Symptoms | Depressive symptoms in both visits 2 & 3 | Depressive symptoms in 2 years | Depressive symptoms in 4 years |
|---------|---------------------------------|------------------------------------------|--------------------------------|--------------------------------|
| Overall | 22.3 (21.3-23.3)                | 4.4 (4.0-4.9)                            | 13.2 (12.5-14.1)               | 16.8 (15.9-17.7)               |
| Rural   | 25.7 (24.6-26.8)                | 5.3 (4.8-5.8)                            | 15.3 (14.3-16.2)               | 18.8 (17.8-19.8)               |
| Urban   | 15.3 (13.4-17.2)                | 2.6 (1.9-3.3)                            | 9.0 (7.4-10.6)                 | 12.2 (10.4-14.1)               |
| Men     | 16.7 (15.5-17.9)                | 3.0 (2.5-3.5)                            | 9.9 (9.0-10.9)                 | 12.2 (11.1-13.2)               |
| Women   | 27.9 (26.4-29.4)                | 5.8 (5.1-6.6)                            | 16.6 (15.3-17.9)               | 21.5 (20.1-22.9)               |

For peer review only



**Table 3. Factors associated with the incidence of depressive symptoms in 4 years of follow-up**

| Variables                                         | Odds ratio (95% confidence interval) | <i>P</i>         |
|---------------------------------------------------|--------------------------------------|------------------|
| Age, per year older                               | 0.98 (0.97-0.99)                     | <b>0.002</b>     |
| Male vs. Female                                   | 0.60 (0.49-0.72)                     | <b>&lt;.0001</b> |
| Education level                                   |                                      |                  |
| <i>No formal education or illiterate</i>          | ref.                                 | <b>0.0004</b>    |
| <i>Some primary school (read and write)</i>       | 1.06 (0.88-1.28)                     |                  |
| <i>Finished primary school</i>                    | 0.88 (0.73-1.05)                     |                  |
| <i>Junior high school or above</i>                | 0.72 (0.60-0.87)                     |                  |
| Rural vs. Urban                                   | 1.66 (1.38-1.98)                     | <b>&lt;.0001</b> |
| Not married vs. Married                           | 1.26 (1.01-1.57)                     | <b>0.04</b>      |
| Smoking status                                    |                                      |                  |
| <i>Current smokers</i>                            | ref.                                 |                  |
| <i>Former smokers</i>                             | 0.69 (0.53-0.91)                     | <b>0.03</b>      |
| <i>Nonsmokers</i>                                 | 0.96 (0.80-1.17)                     |                  |
| Drinking status                                   |                                      |                  |
| <i>Never drinkers</i>                             |                                      |                  |
| <i>Former drinkers</i>                            | 1.03 (0.78-1.36)                     | 0.21             |
| <i>Occasional drinkers</i>                        | 0.83 (0.59-1.15)                     |                  |
| <i>Regular drinkers</i>                           | 0.83 (0.68-1.01)                     |                  |
| Body mass index, per 1 kg/m <sup>2</sup> increase | 0.99 (0.97-1.01)                     | 0.16             |
| Self-perceived health status                      |                                      |                  |
| <i>Excellent</i>                                  | 0.38 (0.26-0.57)                     | <b>&lt;.0001</b> |
| <i>Very good</i>                                  | 0.36 (0.28-0.46)                     |                  |
| <i>Good</i>                                       | 0.53 (0.43-0.64)                     |                  |
| <i>Fair</i>                                       | 0.58 (0.48-0.71)                     |                  |
| <i>Poor</i>                                       | ref.                                 |                  |
| Sleep duration, per hour longer                   | 0.90 (0.87-0.93)                     | <b>&lt;.0001</b> |
| Hypertension (Y vs. N)                            | 1.06 (0.92-1.21)                     | 0.44             |
| Dyslipidemia (Y vs. N)                            | 0.92 (0.73-1.16)                     | 0.50             |
| Diabetes (Y vs. N)                                | 1.19 (1.00-1.42)                     | <b>0.04</b>      |
| Cancer (Y vs. N)                                  | 0.97 (0.47-2.01)                     | 0.94             |
| Chronic Lung Disease (Y vs. N)                    | 1.16 (0.92-1.46)                     | 0.22             |
| Chronic Liver Disease (Y vs. N)                   | 0.86 (0.61-1.21)                     | 0.39             |
| Heart Disease (Y vs. N)                           | 1.05 (0.85-1.30)                     | 0.63             |
| Stroke (Y vs. N)                                  | 1.00 (0.61-1.64)                     | 0.99             |
| Chronic Kidney Disease (Y vs. N)                  | 1.37 (1.05-1.79)                     | <b>0.02</b>      |
| Chronic Digestive Disorders (Y vs. N)             | 1.09 (0.93-1.27)                     | 0.28             |
| Psychological Disorders (Y vs. N)                 | 0.89 (0.43-1.85)                     | 0.76             |
| Dementia (Y vs. N)                                | 1.19 (0.58-2.45)                     | 0.64             |
| Asthma (Y vs. N)                                  | 1.21 (0.83-1.77)                     | 0.33             |

1  
2  
3  
4  
5  
6  
7  
8  
9  
10  
11  
12  
13  
14  
15  
16  
17  
18  
19  
20  
21  
22  
23  
24  
25  
26  
27  
28  
29  
30  
31  
32  
33  
34  
35  
36  
37  
38  
39  
40  
41  
42  
43  
44  
45  
46  
47  
48  
49  
50  
51  
52  
53  
54  
55  
56  
57  
58  
59  
60

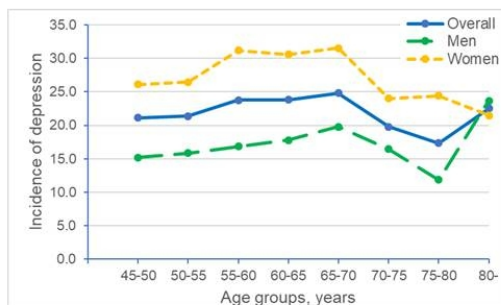

Figure 1. The Incidence of Depressive Symptoms in 4 Years of Follow-up among Participants of the CHARLS

254x190mm (96 x 96 DPI)

**STROBE 2007 (v4) Statement—Checklist of items that should be included in reports of *cohort studies***

| Section/Topic                | Item # | Recommendation                                                                                                                                                                       | Reported on page # |
|------------------------------|--------|--------------------------------------------------------------------------------------------------------------------------------------------------------------------------------------|--------------------|
| <b>Title and abstract</b>    | 1      | (a) Indicate the study's design with a commonly used term in the title or the abstract                                                                                               | 3                  |
|                              |        | (b) Provide in the abstract an informative and balanced summary of what was done and what was found                                                                                  | 3                  |
| <b>Introduction</b>          |        |                                                                                                                                                                                      |                    |
| Background/rationale         | 2      | Explain the scientific background and rationale for the investigation being reported                                                                                                 | 6-7                |
| Objectives                   | 3      | State specific objectives, including any prespecified hypotheses                                                                                                                     | 7                  |
| <b>Methods</b>               |        |                                                                                                                                                                                      |                    |
| Study design                 | 4      | Present key elements of study design early in the paper                                                                                                                              | 8                  |
| Setting                      | 5      | Describe the setting, locations, and relevant dates, including periods of recruitment, exposure, follow-up, and data collection                                                      | 8-9                |
| Participants                 | 6      | (a) Give the eligibility criteria, and the sources and methods of selection of participants. Describe methods of follow-up                                                           | 8                  |
|                              |        | (b) For matched studies, give matching criteria and number of exposed and unexposed                                                                                                  | NA                 |
| Variables                    | 7      | Clearly define all outcomes, exposures, predictors, potential confounders, and effect modifiers. Give diagnostic criteria, if applicable                                             | 9-11               |
| Data sources/<br>measurement | 8*     | For each variable of interest, give sources of data and details of methods of assessment (measurement). Describe comparability of assessment methods if there is more than one group | 9                  |
| Bias                         | 9      | Describe any efforts to address potential sources of bias                                                                                                                            | 17                 |
| Study size                   | 10     | Explain how the study size was arrived at                                                                                                                                            | 8                  |
| Quantitative variables       | 11     | Explain how quantitative variables were handled in the analyses. If applicable, describe which groupings were chosen and why                                                         | 12                 |
| Statistical methods          | 12     | (a) Describe all statistical methods, including those used to control for confounding                                                                                                | 12                 |
|                              |        | (b) Describe any methods used to examine subgroups and interactions                                                                                                                  | NA                 |
|                              |        | (c) Explain how missing data were addressed                                                                                                                                          | NA                 |
|                              |        | (d) If applicable, explain how loss to follow-up was addressed                                                                                                                       | NA                 |
|                              |        | (e) Describe any sensitivity analyses                                                                                                                                                | NA                 |
| <b>Results</b>               |        |                                                                                                                                                                                      |                    |

|                          |     |                                                                                                                                                                                                              |           |
|--------------------------|-----|--------------------------------------------------------------------------------------------------------------------------------------------------------------------------------------------------------------|-----------|
| Participants             | 13* | (a) Report numbers of individuals at each stage of study—eg numbers potentially eligible, examined for eligibility, confirmed eligible, included in the study, completing follow-up, and analysed            | 8         |
|                          |     | (b) Give reasons for non-participation at each stage                                                                                                                                                         | NA        |
|                          |     | (c) Consider use of a flow diagram                                                                                                                                                                           | NA        |
| Descriptive data         | 14* | (a) Give characteristics of study participants (eg demographic, clinical, social) and information on exposures and potential confounders                                                                     | 13        |
|                          |     | (b) Indicate number of participants with missing data for each variable of interest                                                                                                                          | NA        |
|                          |     | (c) Summarise follow-up time (eg, average and total amount)                                                                                                                                                  | 8         |
| Outcome data             | 15* | Report numbers of outcome events or summary measures over time                                                                                                                                               | NA        |
| Main results             | 16  | (a) Give unadjusted estimates and, if applicable, confounder-adjusted estimates and their precision (eg, 95% confidence interval). Make clear which confounders were adjusted for and why they were included | 11, 13-14 |
|                          |     | (b) Report category boundaries when continuous variables were categorized                                                                                                                                    | NA        |
|                          |     | (c) If relevant, consider translating estimates of relative risk into absolute risk for a meaningful time period                                                                                             | NA        |
| Other analyses           | 17  | Report other analyses done—eg analyses of subgroups and interactions, and sensitivity analyses                                                                                                               | NA        |
| <b>Discussion</b>        |     |                                                                                                                                                                                                              |           |
| Key results              | 18  | Summarise key results with reference to study objectives                                                                                                                                                     | 14        |
| <b>Limitations</b>       |     |                                                                                                                                                                                                              |           |
| Interpretation           | 20  | Give a cautious overall interpretation of results considering objectives, limitations, multiplicity of analyses, results from similar studies, and other relevant evidence                                   | 17        |
| Generalisability         | 21  | Discuss the generalisability (external validity) of the study results                                                                                                                                        | 17        |
| <b>Other information</b> |     |                                                                                                                                                                                                              |           |
| Funding                  | 22  | Give the source of funding and the role of the funders for the present study and, if applicable, for the original study on which the present article is based                                                | 20        |

\*Give information separately for cases and controls in case-control studies and, if applicable, for exposed and unexposed groups in cohort and cross-sectional studies.

**Note:** An Explanation and Elaboration article discusses each checklist item and gives methodological background and published examples of transparent reporting. The STROBE checklist is best used in conjunction with this article (freely available on the Web sites of PLoS Medicine at <http://www.plosmedicine.org/>, Annals of Internal Medicine at <http://www.annals.org/>, and Epidemiology at <http://www.epidem.com/>). Information on the STROBE Initiative is available at [www.strobe-statement.org](http://www.strobe-statement.org).

# BMJ Open

## **Incidence and risk factors of depressive symptoms in four years of follow-up among mid-aged and elderly community-dwelling Chinese adults: Findings from the China health and Retirement Longitudinal Study**

|                                 |                                                                                                                                                                                                                                                                                                                                                                                                                                                                                                                                                                                                                                                                           |
|---------------------------------|---------------------------------------------------------------------------------------------------------------------------------------------------------------------------------------------------------------------------------------------------------------------------------------------------------------------------------------------------------------------------------------------------------------------------------------------------------------------------------------------------------------------------------------------------------------------------------------------------------------------------------------------------------------------------|
| Journal:                        | <i>BMJ Open</i>                                                                                                                                                                                                                                                                                                                                                                                                                                                                                                                                                                                                                                                           |
| Manuscript ID                   | bmjopen-2019-029529.R1                                                                                                                                                                                                                                                                                                                                                                                                                                                                                                                                                                                                                                                    |
| Article Type:                   | Research                                                                                                                                                                                                                                                                                                                                                                                                                                                                                                                                                                                                                                                                  |
| Date Submitted by the Author:   | 14-May-2019                                                                                                                                                                                                                                                                                                                                                                                                                                                                                                                                                                                                                                                               |
| Complete List of Authors:       | Wen, Yue; West China Hospital, Sichuan University, Department of Gastrointestinal Surgery<br>Liu, Chunjuan; West China Hospital, Sichuan University, Department of Gastrointestinal Surgery<br>Liao, Jing; West China Hospital, Sichuan University, Department of Gastrointestinal Surgery<br>Yin, Yiqiong; West China Hospital, Sichuan University, Department of Gastrointestinal Surgery<br>Wu, Dongmei; University of Electronic Science and Technology of China, The Clinical Hospital of Chengdu Brain Science Institute, MOE Key Lab for Neuroinformation; The Fourth People's Hospital of Chengdu & Chengdu Mental Health Center, Psychiatric Research Laboratory |
| <b>Primary Subject Heading</b>: | Mental health                                                                                                                                                                                                                                                                                                                                                                                                                                                                                                                                                                                                                                                             |
| Secondary Subject Heading:      | Epidemiology                                                                                                                                                                                                                                                                                                                                                                                                                                                                                                                                                                                                                                                              |
| Keywords:                       | depressive symptoms, incidence, mid-aged and older adults, China                                                                                                                                                                                                                                                                                                                                                                                                                                                                                                                                                                                                          |
|                                 |                                                                                                                                                                                                                                                                                                                                                                                                                                                                                                                                                                                                                                                                           |

SCHOLARONE™  
Manuscripts

1  
2  
3 **Incidence and risk factors of depressive symptoms in four years of follow-up among mid-**  
4 **aged and elderly community-dwelling Chinese adults: Findings from the China Health and**  
5  
6  
7 **Retirement Longitudinal Study**  
8  
9

10 Yue Wen, Chunjuan Liu, Jing Liao, Yiqiong Yin\*, Dongmei Wu\*

11  
12 Correspondence should be made to:

13  
14 Dongmei Wu, PhD, RN

15  
16 Department of Nursing, The Clinical Hospital of Chengdu Brain Science Institute, MOE Key

17  
18 Lab for Neuroinformation, University of Electronic Science and Technology of China

19  
20 Huli West 1st Lane, Chengdu, Sichuan Province, China, 610036.

21  
22 Tel: 86-28-69515754

23  
24 E-mail: [wudongmei\\_2001@163.com](mailto:wudongmei_2001@163.com)

25  
26 Yiqiong Yin, BN, RN

27  
28 Chief Superintendent Nurse, Department of Gastrointestinal Surgery, West China Hospital,

29  
30 Sichuan University

31  
32 37 Guoxue Xiang Street, Chengdu, Sichuan Province, China, 610041.

33  
34 Tel: 86-28-85422877

35  
36 E-mail: [yiqiong489@163.com](mailto:yiqiong489@163.com)

37  
38 \*: Yiqiong Yin and Dongmei Wu were co-corresponding authors for this manuscript.

39  
40 The full names, institutions, city, and country of all other co-authors:

41  
42 Yue Wen, BN, RN

43  
44 Supervisor Nurse, Department of Gastrointestinal Surgery, West China Hospital, Sichuan

45  
46 University

47  
48 37 Guoxue Xiang Street, Chengdu, China, 610041. E-mail: [wenyue19820327@163.com](mailto:wenyue19820327@163.com)

1  
2  
3 Chunjuan Liu, BN, RN

4  
5 Supervisor Nurse, Department of Gastrointestinal Surgery, West China Hospital, Sichuan  
6  
7 University

8  
9  
10 37 Guoxue Xiang Street, Chengdu, China, 610041. E-mail: [liuchunjuan2002@163.com](mailto:liuchunjuan2002@163.com)

11  
12 Jing Liao, MSN, RN

13  
14 Senior Nurse, Department of Gastrointestinal Surgery, West China Hospital, Sichuan University

15  
16 37 Guoxue Xiang Street, Chengdu, China, 610041. E-mail: [m15982277765@163.com](mailto:m15982277765@163.com)

17  
18 Yiqiong Yin, BN, RN

19  
20 Chief Superintendent Nurse, Department of Gastrointestinal Surgery, West China Hospital,  
21  
22 Sichuan University

23  
24 37 Guoxue Xiang Street, Chengdu, China, 610041. E-mail: [yiqiong489@163.com](mailto:yiqiong489@163.com)

25  
26 Dongmei Wu, PhD, RN

27  
28 Assistant Professor, Department of Nursing, The Clinical Hospital of Chengdu Brain Science

29  
30 Institute, MOE Key Lab for Neuroinformation, University of Electronic Science and Technology  
31  
32 of China

33  
34 Huli West 1st Lane, Chengdu, China, 610036. Tel: 86-28-69515754. E-mail:

35  
36  
37  
38  
39  
40 [wudongmei\\_2001@163.com](mailto:wudongmei_2001@163.com)

41  
42 Word count: 5404

## Abstract

**Objectives.** The purpose of this study was to examine the incidence of depressive symptoms, and determine if baseline risk factors conferred a risk for incident depressive symptoms over time in a nationally representative sample of mid-aged and elderly Chinese population.

**Design.** This study was a secondary analysis of a prospective cohort from a nationally representative sample.

**Setting.** Community samples in 28 provinces of China were recruited from the baseline survey of the China Health and Retirement Longitudinal Study. A four-stage, stratified, cluster probability sampling strategy was used, which included 10,257 households with members aged 45 years or older and their spouse.

**Participants.** A total of 11,533 participants free of depressive symptoms at baseline were identified, and 10,288 were re-examined in either the first and/or the second follow-up surveys. The current analyses were conducted among the 10,288 participants.

**Primary and secondary outcome measures.** Depressive symptoms were measured by the Center for Epidemiological Studies Depression Scale short form.

**Results.** The findings showed that the incidence of depressive symptoms in a 4-year follow-up was as high as 22.3%. The incidence was higher in rural areas and women. Furthermore, longer sleeping duration and better self-perceived health status were both associated with lower risk of depressive symptoms. On contrary, having diabetes and chronic kidney disease at baseline increased the risk of depressive symptoms. However, baseline body mass index was not associated with the onset of depressive symptoms in this population.



1  
2  
3 **Conclusions.** The findings of this study highlight the importance of developing an appropriate  
4 screening test to identify depressive symptoms for those who are vulnerable and ensure these  
5 individuals can receive early interventions for depressive symptoms.  
6  
7  
8  
9

10 **Key words:** depressive symptoms, incidence, mid-aged and older adults, China  
11  
12  
13  
14  
15  
16  
17  
18  
19  
20  
21  
22  
23  
24  
25  
26  
27  
28  
29  
30  
31  
32  
33  
34  
35  
36  
37  
38  
39  
40  
41  
42  
43  
44  
45  
46  
47  
48  
49  
50  
51  
52  
53  
54  
55  
56  
57  
58  
59  
60

### Strengths and limitations of this study

- Since the sample was representative of community-dwelling mid-aged and older Chinese adults, the study results can be generalized to mid-aged and older Chinese adults.
- This is the first study in China to estimate the incidence of depressive symptoms in a nationally representative population in China.
- Depressive symptoms were based on self-reports instead of clinically diagnosis. Therefore, information bias may be present. However, with longitudinal design, information bias in the current study was very likely to be non-differential.
- This study was a prospective analysis of baseline risk factors with depressive symptoms at follow-up, and no causal associations between these predictors and depressive symptoms can be drawn from the analysis.

## Introduction

Depression has been recognized as a leading cause of disability and a major contributor to disease burdens globally<sup>1</sup>. An estimated 322 million adults had depression in 2015 worldwide, with nearly half of these people living in the South-East Asia and Western Pacific regions<sup>2</sup>. In China, about 4.2% adult population was estimated to be depressed, and the prevalence of depression reached a peak in older adulthood<sup>2</sup>. With fast economic growth, mid-aged adults are exposed to a high-stress lifestyle, which is thought to contribute significantly to an increase in mental health disorders in susceptible people<sup>1</sup>. Older adults, on the other hand, face noteworthy challenges to their life, including loss of independence, loss of social support due to the death of a spouse or weakened family connectedness (traditionally referred to as ‘filial piety’), financial difficulties, and medical vulnerability<sup>3</sup>. Late-life depressive symptoms increase risk for significant impairment in social function<sup>3</sup>, dementia<sup>4</sup>, declined quality of life<sup>5</sup>, and suicide<sup>6</sup>. They further complicate the prognosis of concurrent medical problems by increasing physical disability and decreasing motivation and adherence to prescribed medications and/or exercise or rehabilitation programs<sup>7,8</sup>.

Although depression has come to be regarded as the common cold of psychosocial functioning in Western culture, mental disorders are still viewed as degrading not only to the patient, but also to the entire family in Chinese culture<sup>9,10</sup>. In addition, although effective interventions have been developed to alleviate symptoms of depression, depressive symptoms are often overlooked among the elderly, since most of them mistakenly consider these symptoms to be part of the normal ageing process<sup>11</sup>. Therefore, older adults may not actively seek medical treatment and leave their depressive symptoms undiagnosed or untreated. As persons aged 45 or older will increase from 32% to 51% of the total population from 2010 to 2040 in China<sup>12</sup>,

1  
2  
3 reliable and up-to-date estimates of the proportion of this population affected by depressive  
4 symptoms are a key ingredient of effective health policy, planning, and evaluation.  
5  
6

7  
8 Recently, a number of population-based studies have estimated prevalence of depressive  
9 symptoms among mid-aged and older Chinese adults <sup>3 11 13 14</sup>. Given that all these studies were  
10 cross-sectional, the incidence of depressive symptoms among mid-aged and older Chinese adults  
11 was not clear. Furthermore, despite a myriad of studies that examined a number of health  
12 conditions associated with an increased risk of mid- and late-life depressive symptoms, including  
13 chronic diseases, overweight/obesity, sleep duration, and self-perceived health status <sup>3 14-17</sup>, the  
14 prospective relationships between these health conditions and depressive symptoms have not  
15 been well understood in this population. Such prospective relationships may provide further  
16 evidence on how baseline conditions may be predictive of depressive symptoms in the follow-up  
17 than cross-sectional analysis, especially given that these health conditions are expected to be a  
18 great challenge to an increasing aging population, and can often co-occur with depressive  
19 symptoms which may make these conditions worse <sup>3</sup>. A better understanding of these  
20 associations may also provide information that is useful in identifying patients who are  
21 vulnerable to mid-life or late-life depressive symptoms, and proactively assessing and treating  
22 modifiable risk factors during primary health care service.  
23  
24  
25  
26  
27  
28  
29  
30  
31  
32  
33  
34  
35  
36  
37  
38  
39  
40  
41

42 Therefore, the purpose of this study was to examine the incidence of depressive  
43 symptoms among mid-aged and older adults in China, and determine if baseline sleep duration,  
44 body weight, self-perceived health status, and chronic conditions conferred a risk for incident  
45 depressive symptoms over time, using baseline and four years of follow-up data from the China  
46 Health and Retirement Longitudinal Study (CHARLS).  
47  
48  
49  
50  
51  
52

### 53 **Methods**

## Study Design

This study was a secondary analysis of prospective data from the CHARLS. The CHARLS is a nationwide, community-engaged, population-based epidemiological study of Chinese adults aged 45 years or older. The purpose of the CHARLS was to obtain detailed information regarding the dynamics of retirement and how it interacts with health, health insurance, and economic well-being. The CHARLS collects detailed information on a wide range of domains, including demographics, health status, physical measures, employment history, pension insurance, retirement, income, expenditures and assets<sup>18</sup>. The current study used data from baseline, the first, and the second follow-up surveys.

## Participants

The CHARLS national baseline survey was conducted in 28 provinces (Tibet, Ningxia, and Hainan were not included) across the country from May 2011 to March 2012. It was a survey of 10,257 households with members aged 45 years or older and their spouse, for a total of about 17,708 individuals. A four-stage, stratified, cluster probability sampling strategy was used to select eligible participants<sup>18</sup>. Details of the sampling procedure are published elsewhere<sup>19</sup>. The response rate for the survey was over 80% (94% in rural areas and 69% in urban areas)<sup>18</sup>. The baseline cohort of the CHARLS participants was followed up every two years with the same survey questionnaires and biomedical measures<sup>18</sup>. The first follow-up survey of the CHARLS was fielded between July 2013 and January 2014. Subjects in this study used the same inclusion and exclusion criteria as the original study. A total of 11,533 participants free of depressive symptoms at baseline were identified, of whom 9,329 participated in the first follow-up survey in 2013-2014, 9,157 were examined in the second follow-up survey in 2015-2016, and 10,288 were

1  
2  
3 followed in either the first or the second follow-up surveys. The current analyses were conducted  
4  
5 among the 10,288 participants.  
6

### 7 **Patient and Public Involvement**

8  
9  
10 In the current study, we used de-identified data from the CHARLS with no direct  
11  
12 involvement of or interaction with participants in the design, recruitment or conduct of the  
13  
14 original cohort study.  
15

### 16 **Variables, Definitions, and Measures**

17  
18  
19 **Depressive symptoms.** The Center for Epidemiological Studies Depression Scale (CES-  
20  
21 D) short form was used to measure depressive symptoms<sup>20</sup>. The CES-D short form consists of  
22  
23 ten items, and each item was rated on a four-point Likert scale with answers ranging from 0  
24  
25 (rarely or none of the time) to 3 (most or all of the time) with the total possible summary score of  
26  
27 0 to 30. The time frame for the CES-D short form refers to the week prior to interview. Item 5  
28  
29 (“feeling hopeful about the future”) and 8 (“feeling happy”) were reversely scored before  
30  
31 analysis. Higher scores corresponds to higher levels of depressive symptoms, and a score of 12  
32  
33 or higher has been used as the cut-off point for depressive symptoms<sup>21</sup>.  
34  
35  
36

37  
38 The CES-D short form has been validated among a subsample of 742 CHARLS  
39  
40 participants aged 60 years and older, showing adequate psychometric properties<sup>21</sup>.  
41  
42 Confirmatory factor analysis showed that the two-factor model had the best fit. Depressive affect  
43  
44 and somatic retardation were loaded as the first factor, and positive affect was loaded as the  
45  
46 second factor. The two-factor structure varied across both genders in multi-group analysis ( $\chi^2=$   
47  
48 144.13,  $p<0.001$ ).  $R^2$  coefficient was used to measure the reliability of each item, and some of  
49  
50 them differed between both gender groups. For example, depressive affect and somatic  
51  
52  
53  
54  
55  
56  
57  
58  
59  
60

1  
2  
3 retardation accounted for 37% and 64% of the variance in the depression indicator (“bothered”)  
4  
5 for the males and females, respectively <sup>21</sup>.  
6  
7

8 **Measure of health conditions associated with depressive symptoms.** These factors  
9  
10 included chronic conditions, overweight/obesity, sleep duration, and self-perceived health status.  
11 Information on chronic conditions was primarily based on self-reports except hypertension and  
12 diabetes. Participants were asked if they had been diagnosed with any of the following health  
13 conditions: arthritis, dyslipidemia, cancer (excluding minor skin cancers), liver diseases (except  
14 for fatty liver, tumors or cancer), cardiovascular diseases (heart attack, coronary heart disease,  
15 angina, congestive heart failure, or other heart problems), stroke, kidney disease (except for  
16 cancer or tumor), stomach or other gastrointestinal diseases (except for tumor or cancer),  
17 memory-related diseases, and asthma. Participants answered “yes” to these questions were  
18 defined as having these doctor-diagnosed conditions.  
19  
20  
21  
22  
23  
24  
25  
26  
27  
28  
29

30  
31 Hypertension was defined based on the most current guidelines from the American Heart  
32 Association, which have lowered the threshold of hypertension cut-off points to 130/80 mmHg <sup>22</sup>.  
33 A systolic blood pressure measurement of 130 mmHg and higher, or a diastolic measurement of  
34 80 mmHg and higher, or 130/80 mmHg and higher, or taking antihypertensive medications  
35 including modern western medicine, traditional Chinese medicine, or using other treatment for  
36 hypertension was considered as having hypertension <sup>22</sup>. Blood pressure was measured three  
37 times (approximately 45 seconds apart) for each participant on the left arm in sitting position,  
38 using an electronic blood pressure monitor (Omron™ HEM-7112)<sup>23</sup>.  
39  
40  
41  
42  
43  
44  
45  
46  
47  
48

49 The diagnosis of diabetes was based on the current guidelines from the American  
50 Diabetes Association (2018). Readings of 126 mg/dL or higher for fasting blood glucose  $\geq$ 126  
51 mg/dL, or readings of 200 mg/dL or higher for random blood glucose, or readings of 6.5% or  
52  
53  
54  
55  
56

1  
2  
3 higher for glycated hemoglobin, or use of insulin, or taking oral hypoglycemic medications  
4 including traditional Chinese medicine, modern western medicine, or other diabetes treatment  
5 was considered as having diabetes <sup>24</sup>.  
6  
7

8  
9  
10 Weight was measured to the nearest 0.1 kg using a digital scale (Omron<sup>TM</sup> HN-286,  
11 Yangzhou, China) on an even, uncarpeted surface, with participants removing heavy outer  
12 clothing. Height was measured without shoes to the nearest 0.1 cm using a stadiometer  
13 (Seca<sup>TM</sup>213, Hangzhou, China). Body mass index (BMI, weight in kilograms divided by height  
14 in meters squared) was calculated from the participants' weight and height.  
15  
16

17  
18  
19 Self-perceived health status is a powerful indicator of the health status of elderly people  
20 <sup>25</sup>. It was measured based on self-reports to the following question, “Would you rate health  
21 as...”, with five response options provided: excellent, very good, good, fair, and poor.  
22  
23

24  
25  
26 Sleep duration in hours was collected using a question, “During the past month, how  
27 many hours of actual sleep did you get at night (average hours for one night)? (This may be  
28 shorter than the number of hours you spend in bed.)”  
29  
30

31  
32  
33 **Covariates.** Factors that could confound the main association were identified a priori  
34 from current literature. Covariates included age, gender <sup>3</sup>, education <sup>26</sup>, and marital status <sup>3 27</sup>.  
35 Consistent with a prior CHARLS publication <sup>28</sup>, education was categorized as illiterate or no  
36 formal education, some primary school but can read and write, primary school including home  
37 schooling, and middle school or above. Marital status was grouped as married versus not married.  
38  
39

## 40 41 42 **Ethical Considerations**

43  
44  
45 The CHARLS was approved by the Ethical Review Committee. The current study is a  
46 secondary analysis of the de-identified CHARLS public data. The Ethics Review Committee  
47 granted the current study exemption from review.  
48  
49



## Statistical Analysis

**Incidence of depressive symptoms.** The incidence of depressive symptoms was analyzed taking into account the complex survey design and nonresponse rate in both estimates and the corresponding standard errors (SEs). Participants were categorized into 5-year age groups. SAS PROC SURVEYFREQ procedure was used to obtain the overall and gender specific incidence of depressive symptoms among all participants and by the 5-year age groups. In addition, overall and gender-specific incidence of depressive symptoms was estimated by rural and urban areas. We estimated the incidence of four outcomes of depressive symptoms: having depressive symptoms in the first follow-up survey (2013-2014); having depressive symptoms in the second follow-up survey (2015-2016); ever having depressive symptoms in the first or the second follow-up survey; and consistently having depressive symptoms in both follow-up surveys.

**Prospective analysis.** Baseline characteristics of the participants were summarized as frequency and percentage for categorical variables and mean and standard deviation or median and interquartile range for continuous variables. Associations of baseline health behaviors, including chronic conditions, overweight/obesity, sleep duration, and self-perceived health status, with the incidence of ever having depressive symptoms in 4 years of follow-up were evaluated by a multivariate logistic regression model, while controlling for all covariates as mentioned above. Odds ratios (ORs) and the corresponding 95% confidence intervals (CIs) were reported. The SAS 9.4 (SAS Institute Inc., Cary, North Carolina) was used to perform the analyses. All the p values were two-sided, and  $p < 0.05$  was considered significant.

## Results

### Sample Characteristics

1  
2  
3 A total of 10,288 participants aged 45 years or older were included in the estimate of  
4 depressive symptoms incidence. As shown in Table 1, the average age of all participants was  
5 58.5 years and roughly half participants (49.3%) were women. Most of the participants (73.3%)  
6 lived in rural areas and 60.6% participants had education of primary school or above. The  
7 majority of participants (90.0%) were married or living with a partner at the time of data  
8 collection. About a third of the participants (31.5%) were current smokers and 17.9% were  
9 current regular drinkers. Participants had an average BMI of 23.7 kg/m<sup>2</sup>. The mean duration of  
10 sleep per night was 6.7 hours, and less than 20% of participants perceived their health as very  
11 good or excellent. The mean CES-D short form score was 5.1 at baseline.

### 22 **Incidence of Depressive Symptoms**

23  
24  
25  
26 As shown in Table 2 and in Figure 1, the incidence of ever having depressive symptoms  
27 in 4 years was 22.3% (95% CI: 21.3%-23.3%). The incidence was much higher in rural areas  
28 than that in urban areas (25.7% vs. 15.3%,  $p < 0.0001$ ). Women had higher incidence of  
29 depressive symptoms than men (27.9% vs. 16.7%,  $p < 0.0001$ ). There is no clear pattern of the  
30 incidence of depressive symptoms over age groups (Figure 1). The incidence was highest among  
31 the 65-70 years of age group and lowest among the 45-50 years of age group.

### 32 **Baseline Risk Factors and Incident Depressive Symptoms**

33  
34  
35  
36 As shown in Table 3, in the fully adjusted multivariable logistic regression model,  
37 sleeping duration and self-perceived health status were both inversely associated with the risk of  
38 depressive symptoms. Specifically, participants with an hour longer of sleeping had a 10% (95%  
39 CI: 7%-13%,  $p < 0.0001$ ) lower risk of developing depressive symptoms in 4 years of follow up.  
40 Compared to individuals who perceived their health status as poor, those who perceived their  
41 health status as fair, good, very good, and excellent had 42% (95% CI: 39%-52%), 47% (95% CI:  
42  
43  
44  
45  
46  
47  
48  
49  
50  
51  
52  
53  
54  
55  
56  
57  
58  
59  
60

1  
2  
3 36%-57%), 64% (95% CI: 54%-72%), and 62% (95% CI: 43%-74%) lower risk of developing  
4  
5 depressive symptoms, respectively. In addition, three chronic conditions, diabetes (OR=1.19, 95%  
6  
7 CI: 1.00-1.42, p=0.04), chronic kidney disease (OR=1.37, 95% CI: 1.05-1.79, p=0.02), chronic  
8  
9 digestive disorders (OR=1.15, 95% CI: 1.01-1.31, p=0.04), and arthritis (OR=1.43, 95% CI:  
10  
11 1.28-1.61, p<0.0001) were associated with higher risk of depressive symptoms. However,  
12  
13 baseline BMI was not associated with the onset of depressive symptoms in this population  
14  
15 (OR=0.99, 95% CI: 0.97-1.01). Chronic lung disease (p=0.001), chronic liver disease (p=0.004),  
16  
17 and asthma (p=0.02) were positively associated with incidence of depressive disorder in the raw  
18  
19 analysis, but became non-significant in the fully adjusted model (all p>0.05).  
20  
21  
22  
23

## 24 **Discussion**

25  
26 Through analysis to data of a nationally representative sample of mid-aged and older  
27  
28 Chinese adults, we found that the incidence of depressive symptoms in a 4-year follow-up was as  
29  
30 high as 22.3%. Large disparities in the incidence of depressive symptoms were observed  
31  
32 between rural and urban areas and between men and women. Furthermore, longer sleeping  
33  
34 duration and better self-perceived health status were both associated with lower risk of  
35  
36 depressive symptoms. On contrary, having diabetes and chronic kidney disease at baseline  
37  
38 increased the risk of depressive symptoms. However, baseline BMI was not associated with  
39  
40 depressive symptoms in this population.  
41  
42  
43

44  
45 This is the first study that examined the incidence of depressive symptoms in a nationally  
46  
47 representative population in China. Our study found that in 4 years of follow-up, as high as 22.3%  
48  
49 of the mid-aged and older Chinese adults developed depressive symptoms. Using the same  
50  
51 database, a recent study reported that the prevalence of depressive symptoms at CHARLS  
52  
53 baseline survey was up to 26.2%<sup>13</sup>. Collectively, these findings revealed that depressive  
54  
55  
56  
57  
58  
59  
60

1  
2  
3 symptoms were a major public health challenge in China, and intervention programs should be  
4 developed to reduce the burden of depressive symptoms. Furthermore, large disparities were also  
5 observed between rural and urban residents and between men and women. In particular, women  
6 and residents living in rural areas were at a higher risk of developing depressive symptoms.  
7  
8  
9

10  
11  
12 Individuals with longer sleep duration had lower risk of depressive symptoms. This  
13 finding is in line with previous studies <sup>29 30</sup>. Sleep disorders are often the presenting and core  
14 symptoms of depression <sup>31</sup>. However, treatment of depression did not resolve sleep symptoms,  
15 which may confer a greater risk for depression recurrence and relapse <sup>31</sup>. Therefore, sleep  
16 deprivation should be at least considered as an early indicator of depressive symptoms.  
17  
18  
19 Individuals with sleep deprivation should be aware of their high risk of depressive symptoms and  
20 manage to improve the length of their sleeping.  
21  
22  
23  
24  
25  
26  
27

28  
29 Better self-perceived health status also reduced the risk of depressive symptoms in the  
30 current study. The finding is consistent with studies among other populations <sup>32 33</sup>. Self-perceived  
31 health is a powerful indicator of the overall health status of elderly people <sup>25</sup>. Many factors,  
32 including sociodemographic characteristics, chronic disease, functional status, social  
33 relationships, neighborhood environment, and nutrition pattern, were all important determinants  
34 of self-perceived health <sup>25</sup>. These factors are also associated with depressive symptoms. The  
35 current study adjusted most of the factors, except for functional status, social relationship, and  
36 nutrition pattern, which were not available in the CHARLS database. Still, poorer self-perceived  
37 health status was significantly associated with higher risk of depressive symptoms. Future  
38 studies additionally controlling for those factors will help to evaluate the contribution of those  
39 factors on the associations of self-perceived health status with depressive symptoms.  
40  
41  
42  
43  
44  
45  
46  
47  
48  
49  
50  
51  
52  
53  
54 Furthermore, such study may also help delineate whether self-perceived health status may  
55  
56  
57  
58  
59  
60

1  
2  
3 represent other factors that may lead to depressive symptoms. Finally, individuals with  
4 depressive disorders were more likely to report poor self-perceived health<sup>34 35</sup>. Therefore, there  
5 might be a bidirectional association between depressive symptoms and self-perceived health.  
6  
7  
8  
9  
10 Future studies examining the bi-directional relationship are warranted.

11  
12 Among 12 chronic conditions, baseline chronic kidney disease increased the risk of  
13 depressive symptoms at follow-up. Although the underlying mechanisms have not been well  
14 understood, some authors suggested that the psychosocial and biologic changes in dialysis may  
15 explain this relationship<sup>36</sup>. In addition to chronic kidney disease, baseline diabetes also  
16 conferred a higher risk of symptoms of depression over time in this study. Similar results were  
17 reported in a meta-analysis of 11 studies, which found that people with diabetes at baseline had a  
18 24% higher risk of developing depression at follow-up compared to those without diabetes<sup>37</sup>. In  
19 addition, high prevalence of depression among people with diabetes and/or chronic kidney  
20 disease has also been observed in cross-sectional studies<sup>38-40</sup>. In concordance with these findings,  
21 this study added further evidence that compared to other chronic conditions at baseline, baseline  
22 chronic disease and diabetes were more likely to be associated with depressive symptoms over  
23 time in a population of mid-aged and older Chinese population.

24  
25  
26  
27  
28  
29  
30  
31  
32  
33  
34  
35  
36  
37  
38  
39  
40 Overweight/obesity is well established to interfere with mental health, with depressive  
41 symptoms being more common among overweight/obese individuals than their normal-weight  
42 counterparts, especially in overweight/obese women<sup>41 42</sup>. A meta-analysis of longitudinal studies  
43 further confirmed this relationship, in which excess weight at baseline increased a higher risk for  
44 incident depression at follow-up<sup>43</sup>. In contrast to these findings from Western and European  
45 countries, using data from a prospective survey of a large, representative sample of mid-aged and  
46 elderly community-dwelling residents in Mainland China, we did not find a relationship between  
47  
48  
49  
50  
51  
52  
53  
54  
55  
56  
57  
58  
59  
60

1  
2  
3 baseline BMI and subsequent depressive symptoms over time. These inconsistent findings may  
4 suggest that because participants in the current study were predominantly low in BMI at baseline  
5 (mean BMI was 23.7 kg/m<sup>2</sup>), their likelihood of experiencing depressive symptoms may have  
6 been lower compared to those participants reported in Luppino et al <sup>43</sup>. However, these are  
7 preliminary findings that need to be further investigated in future prospective studies in this  
8 population.  
9

10  
11 The study has several important strengths. First, to the best of our knowledge, this is the  
12 first study to estimate incidence of depressive symptoms in a nationally representative sample of  
13 middle-aged and older Chinese adults. Previous studies have focused on the estimation of  
14 depressive symptoms prevalence <sup>44 45</sup> or investigated the incidence of depressive symptoms in a  
15 regional sample <sup>46</sup>. Second, since the sample was representative of community-dwelling mid-  
16 aged and older Chinese adults, the results can be generalized to mid-aged and older Chinese  
17 adults. Third, a Chinese specific cut-off point of the CES-D short form score for depressive  
18 symptoms has been used, and the cut-off point was validated among middle-aged and older  
19 Chinese adults <sup>21</sup>. Therefore, our study provided more reliable estimate of the incidence of  
20 depressive symptoms. Finally, strict quality control measures, including GPS matching, data  
21 checking, recording and checking interviews, and calling back participants, were implemented at  
22 each stage of the study to ensure data quality and reliability.  
23  
24  
25  
26  
27  
28  
29  
30  
31  
32  
33  
34  
35  
36  
37  
38  
39  
40  
41  
42  
43

44 There were also some limitations in this study that should be acknowledged. First,  
45 depressive symptoms were based on self-reports instead of clinically diagnosis. Therefore,  
46 information bias may be present. However, with longitudinal design, information bias in the  
47 current study was very likely to be non-differential. Since non-differential misclassification  
48 generally bias the association estimates towards the null, our study findings were more robust.  
49  
50  
51  
52  
53  
54  
55  
56

1  
2  
3 Second, nighttime sleep duration was also measured based on self-reports. The use of self-  
4 reported measures in the CHARLS surveys may have biased study results, since participants may  
5 consistently under- or overestimate their nighttime sleep duration <sup>47</sup>. Objective or direct  
6 measures of sleep duration should be used to increase precision and accuracy of self-report  
7 assessment. Finally, this study was a prospective analysis of baseline risk factors with depressive  
8 symptoms at follow-up, and no causal associations between these predictors and depressive  
9 symptoms can be drawn from the analysis.  
10  
11  
12  
13  
14  
15  
16  
17  
18

19 The findings of the current study have important implications for clinical practice. Health  
20 care professionals are especially encouraged to address the needs for better mental health in  
21 elderly population <sup>48</sup>. In view of the high incidence of depressive symptoms (22.3%) among mid-  
22 aged and elderly Chinese, the findings of this study highlight the importance of developing an  
23 appropriate screening test to identify depressive symptoms for those who are vulnerable and  
24 ensure these individuals can receive early interventions for depressive symptoms. The screening  
25 test should include items such as areas of living (rural or urban areas), gender, age groups,  
26 nighttime sleep duration, self-perceived health status, and certain chronic conditions, especially  
27 chronic kidney disease and diabetes. In addition, intervention strategies that address short  
28 nighttime sleep duration may be used to alleviate depressive symptoms and improve mental  
29 health in this population. Intervention programs should also be prioritized to target at specific  
30 populations, such as women and residents living in rural areas, as these populations were at a  
31 higher risk of developing depressive symptoms. Finally, new patients with chronic kidney  
32 disease and diabetes may be needed to screen for depression at initial visit. Potential participants  
33 with serious depressive symptoms should be referred immediately to a mental health professional.  
34  
35  
36  
37  
38  
39  
40  
41  
42  
43  
44  
45  
46  
47  
48  
49  
50  
51  
52  
53  
54  
55  
56  
57  
58  
59  
60

Individuals with these two conditions are particularly vulnerable to the deleterious effects of

1  
2  
3 affective symptoms, since symptoms of depression is a known risk factor for noncompliance  
4  
5 with medical treatment and adverse health outcomes<sup>49 50</sup>.  
6  
7

### 8 **Conclusions**

9  
10 To conclude, our study found a high incidence of depressive symptoms in 4 years of  
11 follow-up among a nationally representative mid-aged and older Chinese population. In addition,  
12  
13 great disparities in the incidence of depressive symptoms were observed between individuals  
14  
15 lived in rural and urban areas and between men and women. Furthermore, we identified that  
16  
17 worse self-perceived health, shorter duration of sleeping, diabetes and chronic kidney disease at  
18  
19 baseline increased the risk for depressive symptoms. These findings supported the importance of  
20  
21 baseline status to longitudinal changes in depressive symptoms. Thus, interventions for  
22  
23 vulnerable mid-aged and older adults should focus on addressing short nighttime sleep duration.  
24  
25 These findings also help identify individuals at higher risk for depressive symptoms, such as  
26  
27 those with chronic kidney disease and diabetes, or women and residents living in rural areas, so  
28  
29 that early interventions can be implemented to prevent depressive symptoms.  
30  
31  
32  
33  
34

### 35 **Figure Legend**

36  
37 Figure 1. The Incidence of Depressive Symptoms in 4 Years of Follow-up among  
38  
39 Participants of the CHARLS  
40  
41  
42  
43  
44  
45  
46  
47  
48  
49  
50  
51  
52  
53  
54  
55  
56  
57  
58  
59  
60



### **Contributorship Statement**

All authors contribute to the conception and design of this study. YW, YY, and DW were responsible for the design, analysis, drafting and revision of this manuscript. CL and JL were responsible for interpretation of data and preparation of the manuscript.

### **Competing Interests Statement**

None declared.

### **Funding Statement**

This work was supported by the Sichuan Science and Technology Program grant number 2018JY0306 to Dr. Dongmei Wu. The CHARLS is funded by Peking University, the National Natural Science Foundation of China, the Behavioral and Social Research Division of the National Institute on Aging, and the World Bank.

### **Acknowledgments**

The authors would gratefully acknowledge the assistance Dr. Tingting Liu, an assistant professor at University of Arkansas Eleanor Mann School of Nursing for editing the manuscript.

### **Patient Consent for Publication**

Not required.

### **Data Sharing Statement**

The study used a public data from the CHARLS that were obtained from the CHARLS home page at <http://charls.pku.edu.cn/en>.

## References

1. Qin X, Wang S, Hsieh C. The prevalence of depression and depressive symptoms among adults in China: Estimation based on a National Household Survey. *China Economic Review* 2016 doi: 10.1016/j.chieco.2016.04.001
2. World Health Organization. Depression and other common mental disorders: Global health estimates. Geneva, Swiss: World Health Organization 2017.
3. Lei X, Sun X, Strauss J, et al. Depressive symptoms and SES among the mid-aged and elderly in China: Evidence from the China Health and Retirement Longitudinal Study national baseline. *Social Science & Medicine* 2014;120:224-32. doi: 10.1016/j.socscimed.2014.09.028 [published Online First: 2014/09/28]
4. Diniz BS, Butters MA, Albert SM, et al. Late-life depression and risk of vascular dementia and Alzheimer's disease: Systematic review and meta-analysis of community-based cohort studies. *The British journal of psychiatry : the journal of mental science* 2013;202:329-35. doi: 10.1192/bjp.bp.112.118307 [published Online First: 2013/05/03]
5. Sivertsen H, Bjørkløf GH, Engedal K, et al. Depression and quality of life in older persons: A review. *Dementia and geriatric cognitive disorders* 2015;40:311-39. doi: 10.1159/000437299
6. Wang CW, Chan CL, Yip PS. Suicide rates in China from 2002 to 2011: An update. *Social psychiatry and psychiatric epidemiology* 2014;49:929-41. doi: 10.1007/s00127-013-0789-5 [published Online First: 2013/11/19]
7. Holzapfel N, Lowe B, Wild B, et al. Self-care and depression in patients with chronic heart failure. *Heart & Lung* 2009;38:392-97. doi: 10.1016/j.hrtlng.2008.11.001 [published Online First: 2009/09/17]

- 1  
2  
3  
4  
5  
6  
7  
8  
9  
10  
11  
12  
13  
14  
15  
16  
17  
18  
19  
20  
21  
22  
23  
24  
25  
26  
27  
28  
29  
30  
31  
32  
33  
34  
35  
36  
37  
38  
39  
40  
41  
42  
43  
44  
45  
46  
47  
48  
49  
50  
51  
52  
53  
54  
55  
56  
57  
58  
59  
60
8. Gonzalez JS, Safren SA, Delahanty LM, et al. Symptoms of depression prospectively predict poorer self-care in patients with type 2 diabetes. *Diabetetic Medicine* 2008;25:1102-07. doi: 10.1111/j.1464-5491.2008.02535.x [published Online First: 2009/02/03]
  9. Zeng B, Sun W, Gary RA, et al. Towards a conceptual model of diabetes self-management among Chinese immigrants in the United States. *International journal of environmental research and public health* 2014;11:6727-42. doi: 10.3390/ijerph110706727 [published Online First: 2014/07/01]
  10. He P, Hu Y, Li C, et al. Predictors of Depressive Symptoms Among Mid-Aged and Older Men With Diabetes in China. *Research and theory for nursing practice* 2019;33(1):6-22. doi: 10.1891/1541-6577.33.1.6 [published Online First: 2019/02/24]
  11. Xu Y, Yang J, Gao J, et al. Decomposing socioeconomic inequalities in depressive symptoms among the elderly in China. *BMC public health* 2016;16:1214. doi: 10.1186/s12889-016-3876-1 [published Online First: 2016/12/03]
  12. United Nations Department of Economic and Social Affairs/Population Division. World population prospects: The 2012 revision, volume II: Demophic profiles. New York, NY: United Nations 2012.
  13. Li C, Miles T, Shen L, et al. Early-life exposure to severe famine and subsequent risk of depressive symptoms in late adulthood: The China Health and Retirement Longitudinal Study. *British Journal of Psychiatry* 2018;213:579-86. doi: 10.1192/bjp.2018.116 [published Online First: 2018/08/31]
  14. Yu J, Li J, Cuijpers P, et al. Prevalence and correlates of depressive symptoms in Chinese older adults: A population-based study. *International journal of geriatric psychiatry* 2012;27:305-12. doi: 10.1002/gps.2721 [published Online First: 2011/05/04]

- 1  
2  
3 15. Alvaro PK, Roberts RM, Harris JK. A systematic review assessing bidirectionality between  
4  
5 sleep disturbances, anxiety, and depression. *Sleep* 2013;36:1059-68. doi:  
6  
7 10.5665/sleep.2810 [published Online First: 2013/07/03]  
8  
9
- 10 16. Wilson-Genderson M, Heid AR, Pruchno R. Onset of multiple chronic conditions and  
11  
12 depressive symptoms: A life events perspective. *Innovation in Aging* 2017;1:igx022-  
13  
14 igx22. doi: 10.1093/geroni/igx022  
15  
16
- 17 17. Qian J, Li N, Ren X. Obesity and depressive symptoms among Chinese people aged 45 and  
18  
19 over. *Scientific reports* 2017;7:45637. doi: 10.1038/srep45637  
20  
21
- 22 18. Zhao Y, Hu Y, Smith JP, et al. Cohort profile: The China Health and Retirement  
23  
24 Longitudinal Study (CHARLS). *International journal of epidemiology* 2014;43:61-68.  
25  
26 doi: 10.1093/ije/dys203 [published Online First: 2012/12/18]  
27  
28
- 29 19. Li C, Liu T, Sun W, et al. Prevalence and risk factors of arthritis in a middle-aged and older  
30  
31 Chinese population: The China Health and Retirement Longitudinal Study.  
32  
33 *Rheumatology (Oxford, England)* 2015;54:697-706. doi: 10.1093/rheumatology/keu391  
34  
35 [published Online First: 2014/10/08]  
36  
37
- 38 20. Andresen EM, Malmgren JA, Carter WB, et al. Screening for depression in well older adults:  
39  
40 Evaluation of a short form of the CES-D (Center for Epidemiologic Studies Depression  
41  
42 Scale). *American journal of preventive medicine* 1994;10(2):77-84. [published Online  
43  
44 First: 1994/03/01]  
45  
46
- 47 21. Chen H, Mui AC. Factorial validity of the Center for Epidemiologic Studies Depression  
48  
49 Scale short form in older population in China. *International psychogeriatrics / IPA*  
50  
51 2014;26:49-57. doi: 10.1017/s1041610213001701 [published Online First: 2013/10/16]  
52  
53  
54  
55  
56  
57  
58  
59  
60

- 1  
2  
3 22. Whelton PK, Carey RM, Aronow WS, et al. 2017  
4  
5 ACC/AHA/AAPA/ABC/ACPM/AGS/APhA/ASH/ASPC/NMA/PCNA guideline for the  
6  
7 prevention, detection, evaluation, and management of high blood pressure in adults: A  
8  
9 report of the American College of Cardiology/American Heart Association Task Force on  
10  
11 Clinical Practice Guidelines. *Journal of the American College of Cardiology*  
12  
13 2018;71:e127-e248. doi: 10.1016/j.jacc.2017.11.006 [published Online First: 2017/11/18]  
14  
15  
16  
17 23. Zhao Y, Crimmins E, Hu P, et al. China Health And Retirement Longitudinal Study: 2011-  
18  
19 2012 national baseline blood data users' guide. Beijing, China: China Center for  
20  
21 Economic Research, Peking Universtiy 2014.  
22  
23  
24 24. American Diabetes Association. 2. Classification and diagnosis of diabetes: Standards of  
25  
26 medical care in diabetes-2018. *Diabetes care* 2018;41:S13-S27. doi: 10.2337/dc18-S002  
27  
28 [published Online First: 2017/12/10]  
29  
30  
31 25. Machón M, Vergara I, Dorronsoro M, et al. Self-perceived health in functionally independent  
32  
33 older people: Associated factors. *BMC geriatrics* 2016;16:66. doi: 10.1186/s12877-016-  
34  
35 0239-9 [published Online First: 2016/03/11]  
36  
37  
38 26. Bjelland I, Krokstad S, Mykletun A, et al. Does a higher educational level protect against  
39  
40 anxiety and depression? The HUNT study. *Social science & medicine (1982)*  
41  
42 2008;66:1334-45. doi: 10.1016/j.socscimed.2007.12.019 [published Online First:  
43  
44 2008/02/01]  
45  
46  
47 27. Cheng HG, Chen S, McBride O, et al. Prospective relationship of depressive symptoms,  
48  
49 drinking, and tobacco smoking among middle-aged and elderly community-dwelling  
50  
51 adults: Results from the China Health and Retirement Longitudinal Study (CHARLS).  
52  
53  
54  
55  
56  
57  
58  
59  
60

- 1  
2  
3 *Journal of affective disorders* 2016;195:136-43. doi: 10.1016/j.jad.2016.02.023  
4  
5 [published Online First: 2016/02/20]  
6  
7  
8 28. Zuo M, Gan C, Liu T, et al. Physical predictors of cognitive function in individuals with  
9  
10 hypertension: Evidence from the CHARLS baseline survey. *Western journal of nursing*  
11  
12 *research* 2018 doi: 10.1177/0193945918770794 [published Online First: 2018/05/11]  
13  
14  
15 29. Sun Y, Shi L, Bao Y, et al. The bidirectional relationship between sleep duration and  
16  
17 depression in community-dwelling middle-aged and elderly individuals: Evidence from a  
18  
19 longitudinal study. *Sleep medicine* 2018;52:221-29. doi: 10.1016/j.sleep.2018.03.011  
20  
21 [published Online First: 2018/06/05]  
22  
23  
24 30. Li Y, Wu Y, Zhai L, et al. Longitudinal association of sleep duration with depressive  
25  
26 symptoms among middle-aged and older Chinese. *Scientific reports* 2017;7:11794. doi:  
27  
28 10.1038/s41598-017-12182-0 [published Online First: 2017/09/20]  
29  
30  
31 31. Nutt D, Wilson S, Paterson L. Sleep disorders as core symptoms of depression. *Dialogues in*  
32  
33 *clinical neuroscience* 2008;10(3):329-36. [published Online First: 2008/11/05]  
34  
35  
36 32. Cole MG, Dendukuri N. Risk factors for depression among elderly community subjects: A  
37  
38 systematic review and meta-analysis. *American Journal of Psychiatry* 2003;160:1147-56.  
39  
40 doi: 10.1176/appi.ajp.160.6.1147 [published Online First: 2003/06/05]  
41  
42  
43 33. Conti CL, Barbosa WM, Simão JBP, et al. Pesticide exposure, tobacco use, poor self-  
44  
45 perceived health and presence of chronic disease are determinants of depressive  
46  
47 symptoms among coffee growers from Southeast Brazil. *Psychiatry Res* 2018;260:187-92.  
48  
49 doi: 10.1016/j.psychres.2017.11.063 [published Online First: 2017/12/01]  
50  
51  
52  
53  
54  
55  
56  
57  
58  
59  
60

- 1  
2  
3 34. Leão T, Perelman J. Depression symptoms as mediators of inequalities in self-reported health:  
4  
5 the case of Southern European elderly. *J Public Health (Oxf)* 2018;40(4):756-63. doi:  
6  
7 10.1093/pubmed/fox173  
8  
9
- 10 35. Alarcão V, Madeira T, Peixoto-Plácido C, et al. Gender differences in psychosocial  
11  
12 determinants of self-perceived health among Portuguese older adults in nursing homes.  
13  
14 *Aging Ment Health* 2018:1-8. doi: 10.1080/13607863.2018.1471583 [published Online  
15  
16 First: 2018/05/23]  
17  
18
- 19 36. Sonikian M, Metaxaki P, Papavasileiou D, et al. Effects of interleukin-6 on depression risk in  
20  
21 dialysis patients. *American journal of nephrology* 2010;31:303-08. doi:  
22  
23 10.1159/000285110 [published Online First: 2010/02/18]  
24  
25
- 26 37. Nouwen A, Winkley K, Twisk J, et al. Type 2 diabetes mellitus as a risk factor for the onset  
27  
28 of depression: A systematic review and meta-analysis. *Diabetologia* 2010;53:2480-86.  
29  
30 doi: 10.1007/s00125-010-1874-x [published Online First: 2010/08/17]  
31  
32
- 33 38. Anderson RJ, Freedland KE, Clouse RE, et al. The prevalence of comorbid depression in  
34  
35 adults with diabetes: A meta-analysis. *Diabetes care* 2001;24(6):1069-78. [published  
36  
37 Online First: 2001/05/26]  
38  
39
- 40 39. Palmer S, Vecchio M, Craig JC, et al. Prevalence of depression in chronic kidney disease:  
41  
42 Systematic review and meta-analysis of observational studies. *Kidney international*  
43  
44 2013;84:179-91. doi: 10.1038/ki.2013.77 [published Online First: 2013/03/15]  
45  
46
- 47 40. Roy T, Lloyd CE. Epidemiology of depression and diabetes: A systematic review. *Journal of*  
48  
49 *affective disorders* 2012;142 Suppl:S8-S21. doi: 10.1016/s0165-0327(12)70004-6  
50  
51 [published Online First: 2012/10/25]  
52  
53  
54  
55  
56  
57  
58  
59  
60

- 1  
2  
3 41. Atlantis E, Baker M. Obesity effects on depression: Systematic review of epidemiological  
4  
5 studies. *International journal of obesity (2005)* 2008;32:881-91. doi: 10.1038/ijo.2008.54  
6  
7 [published Online First: 2008/04/17]  
8  
9
- 10 42. de Wit L, Luppino F, van Straten A, et al. Depression and obesity: A meta-analysis of  
11  
12 community-based studies. *Psychiatry research* 2010;178:230-35. doi:  
13  
14 10.1016/j.psychres.2009.04.015 [published Online First: 2010/05/14]  
15  
16
- 17 43. Luppino FS, de Wit LM, Bouvy PF, et al. Overweight, obesity, and depression: A systematic  
18  
19 review and meta-analysis of longitudinal studies. *Archives of general psychiatry*  
20  
21 2010;67:220-29. doi: 10.1001/archgenpsychiatry.2010.2 [published Online First:  
22  
23 2010/03/03]  
24  
25
- 26 44. Lee S, Tsang A, Huang YQ, et al. The epidemiology of depression in metropolitan China.  
27  
28 *Psychol Med* 2009;39(5):735-47. doi: 10.1017/S0033291708004091 [published Online  
29  
30 First: 2008/08/20]  
31  
32
- 33 45. Charlson FJ, Baxter AJ, Cheng HG, et al. The burden of mental, neurological, and substance  
34  
35 use disorders in China and India: a systematic analysis of community representative  
36  
37 epidemiological studies. *Lancet* 2016 doi: 10.1016/S0140-6736(16)30590-6  
38  
39
- 40 46. Wang T, Xiao S, Yang C, et al. Prevalence and incidence of depression disorder and  
41  
42 cognitive impairment in the elderly in Shanghai, China. *Alzheimer's & Dementia*  
43  
44 2015;11(7):P832-P33.  
45  
46
- 47 47. Li J, Cacchione PZ, Hodgson N, et al. Afternoon napping and cognition in Chinese older  
48  
49 adults: Findings from the China Health and Retirement Longitudinal Study Baseline  
50  
51 Assessment. *Journal of American Geriatrics Society* 2017;65:373-80. doi:  
52  
53 10.1111/jgs.14368 [published Online First: 2016/12/21]  
54  
55



- 1  
2  
3 48. Avasthi A, Grover S. Clinical practice guidelines for management of depression in elderly.  
4  
5 *Indian journal of psychiatry* 2018;60:S341-S62. doi: 10.4103/0019-5545.224474  
6  
7 [published Online First: 2018/03/15]  
8  
9  
10 49. Zhang Y, Ting RZ, Yang W, et al. Depression in Chinese patients with type 2 diabetes:  
11  
12 Associations with hyperglycemia, hypoglycemia, and poor treatment adherence. *Journal*  
13  
14 *of diabetes* 2015;7:800-8008. doi: 10.1111/1753-0407.12238 [published Online First:  
15  
16 2014/10/29]  
17  
18  
19 50. Fischer MJ, Kimmel PL, Greene T, et al. Elevated depressive affect is associated with  
20  
21 adverse cardiovascular outcomes among African Americans with chronic kidney disease.  
22  
23 *Kidney international* 2011;80:670-78. doi: 10.1038/ki.2011.153 [published Online First:  
24  
25 2011/06/03]  
26  
27  
28  
29  
30  
31  
32  
33  
34  
35  
36  
37  
38  
39  
40  
41  
42  
43  
44  
45  
46  
47  
48  
49  
50  
51  
52  
53  
54  
55  
56  
57  
58  
59  
60

## Tables

**Table 1. Baseline characteristics of the CHARLS participants free of depressive symptoms**

| Variable                                       | Distribution   |
|------------------------------------------------|----------------|
| N                                              | 10,288         |
| age, years, mean (SD)                          | 58.5 (9.8)     |
| Male, n (%)                                    | 5845 (50.7%)   |
| Living in rural areas, n (%)                   | 8,440 (73.3%)  |
| Education, n (%)                               |                |
| <i>No formal education or illiterate</i>       | 2,736 (23.7%)  |
| <i>Some primary school</i>                     | 1,804 (15.7%)  |
| <i>Finished primary school</i>                 | 2,590 (22.5%)  |
| <i>Junior high school or above</i>             | 4,394 (38.1%)  |
| Currently married, n (%)                       | 10,375 (90.0%) |
| Smoking status, n (%)                          |                |
| <i>Current smoker</i>                          | 3,629 (31.5%)  |
| <i>Former smoker</i>                           | 1,034 (9.0%)   |
| <i>Never smoking</i>                           | 6,868 (60.0%)  |
| Drinking status, n (%)                         |                |
| <i>Regular drinkers</i>                        | 1,951 (17.9%)  |
| <i>Occasional drinkers</i>                     | 476 (4.4%)     |
| <i>Former drinkers</i>                         | 646 (5.9%)     |
| <i>Never drinking</i>                          | 7,833 (71.8%)  |
| Weight, kg, mean (SD)                          | 60 (11.8)      |
| Height, m, mean (SD)                           | 1.6 (0.1)      |
| Body mass index, kg/m <sup>2</sup> , mean (SD) | 23.7 (4)       |
| Sleeping duration, hours, mean (SD)            | 6.7 (1.7)      |
| CES-D short form score                         | 5.1 (3.3)      |
| Self-perceived health status, n (%)            |                |
| <i>Excellent</i>                               | 483 (4.2%)     |
| <i>Very good</i>                               | 1,744 (15.1%)  |
| <i>Good</i>                                    | 4,136 (35.9%)  |
| <i>Fair</i>                                    | 3,977 (34.5%)  |
| <i>Poor</i>                                    | 1,187 (10.3%)  |
| Chronic conditions, n (%)                      |                |
| <i>Hypertension</i>                            | 4,045 (40.3%)  |
| <i>Dyslipidemia</i>                            | 1,016 (9.0%)   |
| <i>Diabetes</i>                                | 1,210 (15.0%)  |
| <i>Cancer</i>                                  | 97 (0.8%)      |
| <i>Liver disease</i>                           | 387 (3.4%)     |
| <i>Heart disease</i>                           | 1,162 (10.1%)  |
| <i>Stroke</i>                                  | 188 (1.6%)     |
| <i>Kidney disease</i>                          | 563 (4.9%)     |

|                                 |               |
|---------------------------------|---------------|
| <i>Gastrointestinal disease</i> | 2,180 (18.9%) |
| <i>Dementia</i>                 | 105 (0.9%)    |
| <i>Arthritis</i>                | 3,221 (28.0%) |
| <i>Asthma</i>                   | 312 (2.7%)    |

*Note.* CES-D=Center for Epidemiologic Study of Depression short form; SD=standard deviation.

For peer review only

**Table 2. Incidence of depressive symptoms among the CHARLS participants**

|         | Ever having depressive Symptoms | Depressive symptoms in both visits 2 & 3 | Depressive symptoms in 2 years | Depressive symptoms in 4 years |
|---------|---------------------------------|------------------------------------------|--------------------------------|--------------------------------|
| Overall | 22.3 (21.3-23.3)                | 4.4 (4.0-4.9)                            | 13.2 (12.5-14.1)               | 16.8 (15.9-17.7)               |
| Rural   | 25.7 (24.6-26.8)                | 5.3 (4.8-5.8)                            | 15.3 (14.3-16.2)               | 18.8 (17.8-19.8)               |
| Urban   | 15.3 (13.4-17.2)                | 2.6 (1.9-3.3)                            | 9.0 (7.4-10.6)                 | 12.2 (10.4-14.1)               |
| Men     | 16.7 (15.5-17.9)                | 3.0 (2.5-3.5)                            | 9.9 (9.0-10.9)                 | 12.2 (11.1-13.2)               |
| Women   | 27.9 (26.4-29.4)                | 5.8 (5.1-6.6)                            | 16.6 (15.3-17.9)               | 21.5 (20.1-22.9)               |

For peer review only

**Table 3. Raw and multi-variables adjusted associations with the incidence of depressive symptoms in 4 years of follow-up.**

| Variables                                         | Multi-Variate Adjusted |                  | Raw Association  |                  |
|---------------------------------------------------|------------------------|------------------|------------------|------------------|
|                                                   | OR (95% CI)            | P                | OR (95% CI)      | P                |
| Age, per year older                               | 0.99 (0.98-0.99)       | <b>0.001</b>     | 0.99 (0.99-1.00) | 0.59             |
| Male vs. Female                                   | 0.60 (0.51-0.71)       | <b>&lt;.0001</b> | 0.51 (0.46-0.56) | <b>&lt;.0001</b> |
| Education level                                   |                        |                  |                  |                  |
| <i>No formal education or illiterate</i>          | ref.                   | <b>&lt;.0001</b> | ref.             | <b>&lt;.0001</b> |
| <i>Some primary school</i>                        | 1.06 (0.90-1.25)       |                  | 0.93 (0.80-1.08) |                  |
| <i>Finished primary school</i>                    | 0.83 (0.71-0.97)       |                  | 0.67 (0.57-0.77) |                  |
| <i>Junior high school or above</i>                | 0.71 (0.61-0.84)       |                  | 0.48 (0.42-0.55) |                  |
| Rural vs. Urban                                   | 1.61 (1.38-1.88)       | <b>&lt;.0001</b> | 1.72 (1.50-1.96) | <b>&lt;.0001</b> |
| Not married vs Married                            | 1.25 (1.04-1.51)       | <b>0.02</b>      | 1.28 (1.08-1.51) | <b>0.004</b>     |
| Smoking status                                    |                        |                  |                  |                  |
| <i>Non-smokers</i>                                | ref.                   |                  | ref.             |                  |
| <i>Current smokers</i>                            | 1.02 (0.86-1.20)       | <b>0.03</b>      | 0.51 (0.41-0.62) | <b>&lt;.0001</b> |
| <i>Former smokers</i>                             | 0.75 (0.59-0.96)       |                  | 0.68 (0.60-0.76) |                  |
| Drinking status                                   |                        |                  |                  |                  |
| <i>Never drinkers</i>                             | Ref.                   |                  | ref.             |                  |
| <i>Former drinkers</i>                            | 1.02 (0.80-1.30)       | 0.15             | 0.84 (0.67-1.04) | <b>&lt;.0001</b> |
| <i>Occasional drinkers</i>                        | 0.79 (0.59-1.06)       |                  | 0.59 (0.45-0.78) |                  |
| <i>Regular drinkers</i>                           | 0.85 (0.71-1.01)       |                  | 0.59 (0.51-0.68) |                  |
| Body mass index, per 1 kg/m <sup>2</sup> increase | 0.99 (0.98-1.01)       | 0.20             | 0.99 (0.98-1.00) | 0.14             |
| Self-perceived health status                      |                        |                  |                  |                  |
| <i>Excellent</i>                                  | 0.36 (0.25-0.52)       | <b>&lt;.0001</b> | 0.28 (0.20-0.39) | <b>&lt;.0001</b> |
| <i>Very good</i>                                  | 0.36 (0.29-0.45)       |                  | 0.28 (0.23-0.35) |                  |
| <i>Good</i>                                       | 0.53 (0.44-0.63)       |                  | 0.45 (0.38-0.53) |                  |
| <i>Fair</i>                                       | 0.61 (0.52-0.73)       |                  | 0.56 (0.48-0.66) |                  |
| <i>Poor</i>                                       | ref.                   |                  | ref.             |                  |
| Sleep duration, per hour longer                   | 0.89 (0.87-0.92)       | <b>&lt;.0001</b> | 0.88 (0.85-0.90) | <b>&lt;.0001</b> |
| Hypertension (Y vs. N)                            | 1.07 (0.95-1.21)       | 0.25             | 1.07 (0.96-1.18) | 0.22             |
| Dyslipidemia (Y vs. N)                            | 0.85 (0.69-1.04)       | 0.12             | 0.91 (0.76-1.09) | 0.29             |
| Diabetes (Y vs. N)                                | 1.19 (1.00-1.42)       | <b>0.04</b>      | 1.11 (0.95-2.30) | 0.19             |
| Cancer (Y vs. N)                                  | 0.92 (0.48-1.77)       | 0.80             | 1.17 (0.65-2.12) | 0.61             |
| Chronic Lung Disease (Y vs. N)                    | 1.18 (0.97-1.44)       | 0.10             | 1.33 (1.12-1.58) | <b>0.001</b>     |
| Chronic Liver Disease (Y vs. N)                   | 0.90 (0.67-1.22)       | 0.51             | 1.04 (0.79-1.37) | 0.81             |
| Heart Disease (Y vs. N)                           | 1.06 (0.88-1.28)       | 0.54             | 1.27 (1.08-1.49) | <b>0.004</b>     |
| Stroke (Y vs. N)                                  | 0.88 (0.56-1.39)       | 0.59             | 1.12 (0.75-1.66) | 0.58             |
| Chronic Kidney Disease (Y vs. N)                  | 1.32 (1.04-1.67)       | <b>0.02</b>      | 1.45 (1.16-1.80) | <b>0.001</b>     |
| Chronic Digestive Disorders (Y vs. N)             | 1.15 (1.01-1.31)       | <b>0.04</b>      | 1.43 (1.26-1.61) | <b>&lt;.0001</b> |
| Psychological Disorders (Y vs. N)                 | 1.00 (0.53-1.89)       | 0.99             | 1.44 (0.81-2.56) | 0.22             |
| Dementia (Y vs. N)                                | 1.31 (0.72-2.38)       | 0.37             | 1.15 (0.67-1.97) | 0.62             |
| Arthritis (Y vs. N)                               | 1.43 (1.28-1.61)       | <b>&lt;.0001</b> | 1.72 (1.54-1.91) | <b>&lt;.0001</b> |
| Asthma (Y vs. N)                                  | 1.25 (0.90-1.75)       | 0.19             | 1.43 (1.06-1.91) | <b>0.02</b>      |

1  
2  
3  
4  
5  
6  
7  
8  
9  
10  
11  
12  
13  
14  
15  
16  
17  
18  
19  
20  
21  
22  
23  
24  
25  
26  
27  
28  
29  
30  
31  
32  
33  
34  
35  
36  
37  
38  
39  
40  
41  
42  
43  
44  
45  
46  
47  
48  
49  
50  
51  
52  
53  
54  
55  
56  
57  
58  
59  
60

Note. CI=confidence interval; OR=odds ratio

For peer review only

1  
2  
3  
4  
5  
6  
7  
8  
9  
10  
11  
12  
13  
14  
15  
16  
17  
18  
19  
20  
21  
22  
23  
24  
25  
26  
27  
28  
29  
30  
31  
32  
33  
34  
35  
36  
37  
38  
39  
40  
41  
42  
43  
44  
45  
46  
47  
48  
49  
50  
51  
52  
53  
54  
55  
56  
57  
58  
59  
60

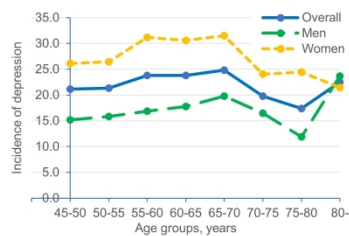

254x190mm (300 x 300 DPI)

**STROBE 2007 (v4) Statement—Checklist of items that should be included in reports of *cohort studies***

| Section/Topic                | Item # | Recommendation                                                                                                                                                                       | Reported on page # |
|------------------------------|--------|--------------------------------------------------------------------------------------------------------------------------------------------------------------------------------------|--------------------|
| <b>Title and abstract</b>    | 1      | (a) Indicate the study's design with a commonly used term in the title or the abstract                                                                                               | 3                  |
|                              |        | (b) Provide in the abstract an informative and balanced summary of what was done and what was found                                                                                  | 3                  |
| <b>Introduction</b>          |        |                                                                                                                                                                                      |                    |
| Background/rationale         | 2      | Explain the scientific background and rationale for the investigation being reported                                                                                                 | 6-7                |
| Objectives                   | 3      | State specific objectives, including any prespecified hypotheses                                                                                                                     | 7                  |
| <b>Methods</b>               |        |                                                                                                                                                                                      |                    |
| Study design                 | 4      | Present key elements of study design early in the paper                                                                                                                              | 8                  |
| Setting                      | 5      | Describe the setting, locations, and relevant dates, including periods of recruitment, exposure, follow-up, and data collection                                                      | 8-9                |
| Participants                 | 6      | (a) Give the eligibility criteria, and the sources and methods of selection of participants. Describe methods of follow-up                                                           | 8                  |
|                              |        | (b) For matched studies, give matching criteria and number of exposed and unexposed                                                                                                  | NA                 |
| Variables                    | 7      | Clearly define all outcomes, exposures, predictors, potential confounders, and effect modifiers. Give diagnostic criteria, if applicable                                             | 9-11               |
| Data sources/<br>measurement | 8*     | For each variable of interest, give sources of data and details of methods of assessment (measurement). Describe comparability of assessment methods if there is more than one group | 9                  |
| Bias                         | 9      | Describe any efforts to address potential sources of bias                                                                                                                            | 17                 |
| Study size                   | 10     | Explain how the study size was arrived at                                                                                                                                            | 8                  |
| Quantitative variables       | 11     | Explain how quantitative variables were handled in the analyses. If applicable, describe which groupings were chosen and why                                                         | 12                 |
| Statistical methods          | 12     | (a) Describe all statistical methods, including those used to control for confounding                                                                                                | 12                 |
|                              |        | (b) Describe any methods used to examine subgroups and interactions                                                                                                                  | NA                 |
|                              |        | (c) Explain how missing data were addressed                                                                                                                                          | NA                 |
|                              |        | (d) If applicable, explain how loss to follow-up was addressed                                                                                                                       | NA                 |
|                              |        | (e) Describe any sensitivity analyses                                                                                                                                                | NA                 |
| <b>Results</b>               |        |                                                                                                                                                                                      |                    |



|                          |     |                                                                                                                                                                                                              |           |
|--------------------------|-----|--------------------------------------------------------------------------------------------------------------------------------------------------------------------------------------------------------------|-----------|
| Participants             | 13* | (a) Report numbers of individuals at each stage of study—eg numbers potentially eligible, examined for eligibility, confirmed eligible, included in the study, completing follow-up, and analysed            | 8         |
|                          |     | (b) Give reasons for non-participation at each stage                                                                                                                                                         | NA        |
|                          |     | (c) Consider use of a flow diagram                                                                                                                                                                           | NA        |
| Descriptive data         | 14* | (a) Give characteristics of study participants (eg demographic, clinical, social) and information on exposures and potential confounders                                                                     | 13        |
|                          |     | (b) Indicate number of participants with missing data for each variable of interest                                                                                                                          | NA        |
|                          |     | (c) Summarise follow-up time (eg, average and total amount)                                                                                                                                                  | 8         |
| Outcome data             | 15* | Report numbers of outcome events or summary measures over time                                                                                                                                               | NA        |
| Main results             | 16  | (a) Give unadjusted estimates and, if applicable, confounder-adjusted estimates and their precision (eg, 95% confidence interval). Make clear which confounders were adjusted for and why they were included | 11, 13-14 |
|                          |     | (b) Report category boundaries when continuous variables were categorized                                                                                                                                    | NA        |
|                          |     | (c) If relevant, consider translating estimates of relative risk into absolute risk for a meaningful time period                                                                                             | NA        |
| Other analyses           | 17  | Report other analyses done—eg analyses of subgroups and interactions, and sensitivity analyses                                                                                                               | NA        |
| <b>Discussion</b>        |     |                                                                                                                                                                                                              |           |
| Key results              | 18  | Summarise key results with reference to study objectives                                                                                                                                                     | 14        |
| <b>Limitations</b>       |     |                                                                                                                                                                                                              |           |
| Interpretation           | 20  | Give a cautious overall interpretation of results considering objectives, limitations, multiplicity of analyses, results from similar studies, and other relevant evidence                                   | 17        |
| Generalisability         | 21  | Discuss the generalisability (external validity) of the study results                                                                                                                                        | 17        |
| <b>Other information</b> |     |                                                                                                                                                                                                              |           |
| Funding                  | 22  | Give the source of funding and the role of the funders for the present study and, if applicable, for the original study on which the present article is based                                                | 20        |

\*Give information separately for cases and controls in case-control studies and, if applicable, for exposed and unexposed groups in cohort and cross-sectional studies.

**Note:** An Explanation and Elaboration article discusses each checklist item and gives methodological background and published examples of transparent reporting. The STROBE checklist is best used in conjunction with this article (freely available on the Web sites of PLoS Medicine at <http://www.plosmedicine.org/>, Annals of Internal Medicine at <http://www.annals.org/>, and Epidemiology at <http://www.epidem.com/>). Information on the STROBE Initiative is available at [www.strobe-statement.org](http://www.strobe-statement.org).

# BMJ Open

## **Incidence and risk factors of depressive symptoms in four years of follow-up among mid-aged and elderly community-dwelling Chinese adults: Findings from the China health and Retirement Longitudinal Study**

|                                 |                                                                                                                                                                                                                                                                                                                                                                                                                                                                                                                                                                                                                                                                           |
|---------------------------------|---------------------------------------------------------------------------------------------------------------------------------------------------------------------------------------------------------------------------------------------------------------------------------------------------------------------------------------------------------------------------------------------------------------------------------------------------------------------------------------------------------------------------------------------------------------------------------------------------------------------------------------------------------------------------|
| Journal:                        | <i>BMJ Open</i>                                                                                                                                                                                                                                                                                                                                                                                                                                                                                                                                                                                                                                                           |
| Manuscript ID                   | bmjopen-2019-029529.R2                                                                                                                                                                                                                                                                                                                                                                                                                                                                                                                                                                                                                                                    |
| Article Type:                   | Research                                                                                                                                                                                                                                                                                                                                                                                                                                                                                                                                                                                                                                                                  |
| Date Submitted by the Author:   | 21-Jun-2019                                                                                                                                                                                                                                                                                                                                                                                                                                                                                                                                                                                                                                                               |
| Complete List of Authors:       | Wen, Yue; West China Hospital, Sichuan University, Department of Gastrointestinal Surgery<br>Liu, Chunjuan; West China Hospital, Sichuan University, Department of Gastrointestinal Surgery<br>Liao, Jing; West China Hospital, Sichuan University, Department of Gastrointestinal Surgery<br>Yin, Yiqiong; West China Hospital, Sichuan University, Department of Gastrointestinal Surgery<br>Wu, Dongmei; University of Electronic Science and Technology of China, The Clinical Hospital of Chengdu Brain Science Institute, MOE Key Lab for Neuroinformation; The Fourth People's Hospital of Chengdu & Chengdu Mental Health Center, Psychiatric Research Laboratory |
| <b>Primary Subject Heading</b>: | Mental health                                                                                                                                                                                                                                                                                                                                                                                                                                                                                                                                                                                                                                                             |
| Secondary Subject Heading:      | Epidemiology                                                                                                                                                                                                                                                                                                                                                                                                                                                                                                                                                                                                                                                              |
| Keywords:                       | depressive symptoms, incidence, mid-aged and older adults, China                                                                                                                                                                                                                                                                                                                                                                                                                                                                                                                                                                                                          |
|                                 |                                                                                                                                                                                                                                                                                                                                                                                                                                                                                                                                                                                                                                                                           |

SCHOLARONE™  
Manuscripts

1  
2  
3 **Incidence and risk factors of depressive symptoms in four years of follow-up among mid-**  
4 **aged and elderly community-dwelling Chinese adults: Findings from the China Health and**  
5  
6  
7 **Retirement Longitudinal Study**  
8  
9

10 Yue Wen, Chunjuan Liu, Jing Liao, Yiqiong Yin\*, Dongmei Wu\*

11  
12 Correspondence should be made to:

13  
14 Dongmei Wu, PhD, RN

15  
16 Department of Nursing, The Clinical Hospital of Chengdu Brain Science Institute, MOE Key

17  
18 Lab for Neuroinformation, University of Electronic Science and Technology of China

19  
20 Huli West 1st Lane, Chengdu, Sichuan Province, China, 610036.

21  
22 Tel: 86-28-69515754

23  
24 E-mail: [wudongmei\\_2001@163.com](mailto:wudongmei_2001@163.com)

25  
26 Yiqiong Yin, BN, RN

27  
28 Chief Superintendent Nurse, Department of Gastrointestinal Surgery, West China Hospital,

29  
30 Sichuan University

31  
32 37 Guoxue Xiang Street, Chengdu, Sichuan Province, China, 610041.

33  
34 Tel: 86-28-85422877

35  
36 E-mail: [yiqiong489@163.com](mailto:yiqiong489@163.com)

37  
38 \*: Yiqiong Yin and Dongmei Wu were co-corresponding authors for this manuscript.

39  
40 The full names, institutions, city, and country of all other co-authors:

41  
42 Yue Wen, BN, RN

43  
44 Supervisor Nurse, Department of Gastrointestinal Surgery, West China Hospital, Sichuan

45  
46 University

47  
48 37 Guoxue Xiang Street, Chengdu, China, 610041. E-mail: [wenyue19820327@163.com](mailto:wenyue19820327@163.com)

1  
2  
3 Chunjuan Liu, BN, RN  
4

5 Supervisor Nurse, Department of Gastrointestinal Surgery, West China Hospital, Sichuan  
6  
7 University  
8

9  
10 37 Guoxue Xiang Street, Chengdu, China, 610041. E-mail: [liuchunjuan2002@163.com](mailto:liuchunjuan2002@163.com)  
11

12 Jing Liao, MSN, RN  
13

14 Senior Nurse, Department of Gastrointestinal Surgery, West China Hospital, Sichuan University  
15

16 37 Guoxue Xiang Street, Chengdu, China, 610041. E-mail: [m15982277765@163.com](mailto:m15982277765@163.com)  
17  
18

19 Yiqiong Yin, BN, RN  
20

21 Chief Superintendent Nurse, Department of Gastrointestinal Surgery, West China Hospital,  
22  
23 Sichuan University  
24

25 37 Guoxue Xiang Street, Chengdu, China, 610041. E-mail: [yiqiong489@163.com](mailto:yiqiong489@163.com)  
26  
27

28 Dongmei Wu, PhD, RN  
29

30 Assistant Professor, Department of Nursing, The Clinical Hospital of Chengdu Brain Science  
31

32 Institute, MOE Key Lab for Neuroinformation, University of Electronic Science and Technology  
33  
34 of China  
35

36 Huli West 1st Lane, Chengdu, China, 610036. Tel: 86-28-69515754. E-mail:  
37

38 [wudongmei\\_2001@163.com](mailto:wudongmei_2001@163.com)  
39  
40

41  
42 Word count: 7467  
43  
44  
45  
46  
47  
48  
49  
50  
51  
52  
53  
54  
55  
56  
57  
58  
59  
60

## Abstract

**Objectives.** The purpose of this study was to examine the incidence of depressive symptoms, and determine if baseline risk factors conferred a risk for incident depressive symptoms over time in a nationally representative sample of mid-aged and elderly Chinese population.

**Design.** This study was a secondary analysis of a prospective cohort from a nationally representative sample.

**Setting.** Community samples in 28 provinces of China were recruited from the baseline survey of the China Health and Retirement Longitudinal Study. A four-stage, stratified, cluster probability sampling strategy was used, which included 10,257 households with members aged 45 years or older and their spouse.

**Participants.** A total of 11,533 participants free of depressive symptoms at baseline were identified, and 10,288 were re-examined in either the first and/or the second follow-up surveys. The current analyses were conducted among the 10,288 participants.

**Primary and secondary outcome measures.** Depressive symptoms were measured by the Center for Epidemiological Studies Depression Scale short form.

**Results.** The findings showed that the incidence of depressive symptoms in a 4-year follow-up was as high as 22.3%. The incidence was higher in rural areas and women. Furthermore, longer sleeping duration and better self-perceived health status were both associated with lower risk of depressive symptoms. On contrary, having diabetes and chronic kidney disease at baseline increased the risk of depressive symptoms. However, baseline body mass index was not associated with the onset of depressive symptoms in this population.

1  
2  
3 **Conclusions.** The findings of this study highlight the importance of developing an appropriate  
4 screening test to identify depressive symptoms for those who are vulnerable and ensure these  
5 individuals can receive early interventions for depressive symptoms.  
6  
7  
8  
9

10 **Key words:** depressive symptoms, incidence, mid-aged and older adults, China  
11  
12  
13  
14  
15  
16  
17  
18  
19  
20  
21  
22  
23  
24  
25  
26  
27  
28  
29  
30  
31  
32  
33  
34  
35  
36  
37  
38  
39  
40  
41  
42  
43  
44  
45  
46  
47  
48  
49  
50  
51  
52  
53  
54  
55  
56  
57  
58  
59  
60

For peer review only

### Strengths and limitations of this study

- Since the sample was representative of community-dwelling mid-aged and older Chinese adults, the study results can be generalized to mid-aged and older Chinese adults.
- This is the first study in China to estimate the incidence of depressive symptoms in a nationally representative population in China.
- Depressive symptoms were based on self-reports instead of clinically diagnosis. Therefore, information bias may be present. However, with longitudinal design, information bias in the current study was very likely to be non-differential.
- This study was a prospective analysis of baseline risk factors with depressive symptoms at follow-up, and no causal associations between these predictors and depressive symptoms can be drawn from the analysis.

## Introduction

Depression has been recognized as a leading cause of disability and a major contributor to disease burdens globally <sup>1</sup>. An estimated 322 million adults had depression in 2015 worldwide, with nearly half of these people living in the South-East Asia and Western Pacific regions <sup>2</sup>. In China, about 4.2% adult population was estimated to be depressed, and the prevalence of depression reached a peak in older adulthood <sup>2</sup>. With fast economic growth, mid-aged adults are exposed to a high-stress lifestyle, which is thought to contribute significantly to an increase in mental health disorders in susceptible people <sup>1</sup>. Older adults, on the other hand, face noteworthy challenges to their life, including loss of independence, loss of social support due to the death of a spouse or weakened family connectedness (traditionally referred to as ‘filial piety’), financial difficulties, and medical vulnerability <sup>3</sup>. Late-life depressive symptoms increase risk for significant impairment in social function <sup>3</sup>, dementia <sup>4</sup>, declined quality of life <sup>5</sup>, and suicide <sup>6</sup>. They further complicate the prognosis of concurrent medical problems by increasing physical disability and decreasing motivation and adherence to prescribed medications and/or exercise or rehabilitation programs <sup>7 8</sup>.

Although depression has come to be regarded as the common cold of psychosocial functioning in Western culture, mental disorders are still viewed as degrading not only to the patient, but also to the entire family in Chinese culture <sup>9 10</sup>. In addition, although effective interventions have been developed to alleviate symptoms of depression, depressive symptoms are often overlooked among the elderly, since most of them mistakenly consider these symptoms to be part of the normal ageing process <sup>11</sup>. Therefore, older adults may not actively seek medical treatment and leave their depressive symptoms undiagnosed or untreated. As persons aged 45 or older will increase from 32% to 51% of the total population from 2010 to 2040 in China <sup>12</sup>,



1  
2  
3 reliable and up-to-date estimates of the proportion of this population affected by depressive  
4 symptoms are a key ingredient of effective health policy, planning, and evaluation.  
5  
6

7  
8 Recently, a number of population-based studies have estimated prevalence of depressive  
9 symptoms among mid-aged and older Chinese adults <sup>3 11 13 14</sup>. Given that all these studies were  
10 cross-sectional, the incidence of depressive symptoms among mid-aged and older Chinese adults  
11 was not clear. Furthermore, despite a myriad of studies that examined a number of health  
12 conditions associated with an increased risk of mid- and late-life depressive symptoms, including  
13 chronic diseases, overweight/obesity, sleep duration, and self-perceived health status <sup>3 14-17</sup>, the  
14 prospective relationships between these health conditions and depressive symptoms have not  
15 been well understood in this population. Such prospective relationships may provide further  
16 evidence on how baseline conditions may be predictive of depressive symptoms in the follow-up  
17 than cross-sectional analysis, especially given that these health conditions are expected to be a  
18 great challenge to an increasing aging population, and can often co-occur with depressive  
19 symptoms which may make these conditions worse <sup>3</sup>. A better understanding of these  
20 associations may also provide information that is useful in identifying patients who are  
21 vulnerable to mid-life or late-life depressive symptoms, and proactively assessing and treating  
22 modifiable risk factors during primary health care service.  
23  
24  
25  
26  
27  
28  
29  
30  
31  
32  
33  
34  
35  
36  
37  
38  
39  
40  
41

42 Therefore, the purpose of this study was to examine the incidence of depressive  
43 symptoms among mid-aged and older adults in China, and determine if baseline sleep duration,  
44 body weight, self-perceived health status, and chronic conditions conferred a risk for incident  
45 depressive symptoms over time, using baseline and four years of follow-up data from the China  
46 Health and Retirement Longitudinal Study (CHARLS).  
47  
48  
49  
50  
51  
52

### 53 **Methods**

## Study Design

This study was a secondary analysis of prospective data from the CHARLS. The CHARLS is a nationwide, community-engaged, population-based epidemiological study of Chinese adults aged 45 years or older. The purpose of the CHARLS was to obtain detailed information regarding the dynamics of retirement and how it interacts with health, health insurance, and economic well-being. The CHARLS collects detailed information on a wide range of domains, including demographics, health status, physical measures, employment history, pension insurance, retirement, income, expenditures and assets<sup>18</sup>. The current study used data from baseline, the first, and the second follow-up surveys.

## Participants

The CHARLS national baseline survey was conducted in 28 provinces (Tibet, Ningxia, and Hainan were not included) across the country from May 2011 to March 2012. It was a survey of 10,257 households with members aged 45 years or older and their spouse, for a total of about 17,708 individuals. A four-stage, stratified, cluster probability sampling strategy was used to select eligible participants<sup>18</sup>. Details of the sampling procedure are published elsewhere<sup>19</sup>. In brief, in the first stage, all counties were grouped by gross domestic product and by urban or rural regions. In the second stage, counties were stratified and sampled using probabilities proportional to size (PPS). Three rural villages and urban neighborhoods were randomly selected as primary sampling units (PSUs) using PPS in each county. In the third stage, all buildings in each PSU were recognized on Google Earth. A sample of 24 households was randomly selected among all households in each PSU. In the final stage, a short screening form was employed to ensure study eligibility in selected households and members of 45 years of age or above were

1  
2  
3 invited to enroll into the study. The response rate for the survey was over 80% (94% in rural  
4  
5 areas and 69% in urban areas) <sup>18</sup>.  
6

7  
8 The baseline cohort of the CHARLS participants was followed up every two years with  
9  
10 the same survey questionnaires and biomedical measures <sup>18</sup>. The first follow-up survey of the  
11  
12 CHARLS was fielded between July 2013 and January 2014. Subjects in this study used the same  
13  
14 inclusion and exclusion criteria as the original study. A total of 11,533 participants free of  
15  
16 depressive symptoms at baseline were identified, of whom 9,329 participated in the first follow-  
17  
18 up survey in 2013-2014, 9,157 were examined in the second follow-up survey in 2015-2016, and  
19  
20 10,288 were followed in either the first or the second follow-up surveys. The current analyses  
21  
22 were conducted among the 10,288 participants.  
23  
24  
25

## 26 **Patient and Public Involvement**

27  
28 Participants with abnormal findings, including depressive symptoms were suggested to  
29  
30 visit a physician for further clinical evaluation. In the current study, we used de-identified data  
31  
32 from the CHARLS with no direct involvement of or interaction with participants in the design,  
33  
34 recruitment or conduct of the original cohort study.  
35  
36  
37

## 38 **Variables, Definitions, and Measures**

39  
40 **Depressive symptoms.** The Center for Epidemiological Studies Depression Scale (CES-  
41  
42 D) short form was used to measure depressive symptoms <sup>20</sup>. The CES-D short form consists of  
43  
44 ten items, and each item was rated on a four-point Likert scale with answers ranging from 0  
45  
46 (rarely or none of the time) to 3 (most or all of the time) with the total possible summary score of  
47  
48 0 to 30. The time frame for the CES-D short form refers to the week prior to interview. Item 5  
49  
50 (“feeling hopeful about the future”) and 8 (“feeling happy”) were reversely scored before  
51  
52  
53  
54  
55  
56  
57  
58  
59  
60

1  
2  
3 analysis. Higher scores corresponds to higher levels of depressive symptoms, and a score of 12  
4  
5 or higher has been used as the cut-off point for depressive symptoms <sup>21</sup>.  
6

7  
8 The CES-D short form has been validated among a subsample of 742 CHARLS  
9  
10 participants aged 60 years and older, showing adequate psychometric properties <sup>21</sup>.  
11  
12 Confirmatory factor analysis showed that the two-factor model had the best fit. Depressive affect  
13  
14 and somatic retardation were loaded as the first factor, and positive affect was loaded as the  
15  
16 second factor. The two-factor structure varied across both genders in multi-group analysis ( $\chi^2=$   
17  
18 144.13,  $p<0.001$ ).  $R^2$  coefficient was used to measure the reliability of each item, and some of  
19  
20 them differed between both gender groups. For example, depressive affect and somatic  
21  
22 retardation accounted for 37% and 64% of the variance in the depression indicator (“bothered”)  
23  
24 for the males and females, respectively <sup>21</sup>.  
25  
26  
27

28 **Measure of health conditions associated with depressive symptoms.** These factors  
29  
30 included chronic conditions, overweight/obesity, sleep duration, and self-perceived health status.  
31  
32 Information on chronic conditions was primarily based on self-reports except hypertension and  
33  
34 diabetes. Participants were asked if they had been diagnosed with any of the following health  
35  
36 conditions: arthritis, dyslipidemia, cancer (excluding minor skin cancers), liver diseases (except  
37  
38 for fatty liver, tumors or cancer), cardiovascular diseases (heart attack, coronary heart disease,  
39  
40 angina, congestive heart failure, or other heart problems), stroke, kidney disease (except for  
41  
42 cancer or tumor), stomach or other gastrointestinal diseases (except for tumor or cancer),  
43  
44 memory-related diseases, and asthma. Participants answered “yes” to these questions were  
45  
46 defined as having these doctor-diagnosed conditions.  
47  
48  
49  
50

51 Hypertension was defined based on the most current guidelines from the American Heart  
52  
53 Association, which have lowered the threshold of hypertension cut-off points to 130/80 mmHg <sup>22</sup>.  
54  
55

1  
2  
3 A systolic blood pressure measurement of 130 mmHg and higher, or a diastolic measurement of  
4  
5 80 mmHg and higher, or 130/80 mmHg and higher, or taking antihypertensive medications  
6  
7 including modern western medicine, traditional Chinese medicine, or using other treatment for  
8  
9 hypertension was considered as having hypertension<sup>22</sup>. Blood pressure was measured three  
10  
11 times (approximately 45 seconds apart) for each participant on the left arm in sitting position,  
12  
13 using an electronic blood pressure monitor (Omron™ HEM-7112)<sup>23</sup>.  
14  
15

16  
17 The diagnosis of diabetes was based on the current guidelines from the American  
18  
19 Diabetes Association (2018). Readings of 126 mg/dL or higher for fasting blood glucose  $\geq$ 126  
20  
21 mg/dL, or readings of 200 mg/dL or higher for random blood glucose, or readings of 6.5% or  
22  
23 higher for glycated hemoglobin, or use of insulin, or taking oral hypoglycemic medications  
24  
25 including traditional Chinese medicine, modern western medicine, or other diabetes treatment  
26  
27 was considered as having diabetes<sup>24</sup>.  
28  
29

30  
31 Weight was measured to the nearest 0.1 kg using a digital scale (Omron™ HN-286,  
32  
33 Yangzhou, China) on an even, uncarpeted surface, with participants removing heavy outer  
34  
35 clothing. Height was measured without shoes to the nearest 0.1 cm using a stadiometer  
36  
37 (Seca™213, Hangzhou, China). Body mass index (BMI, weight in kilograms divided by height  
38  
39 in meters squared) was calculated from the participants' weight and height.  
40  
41

42  
43 Self-perceived health status is a powerful indicator of the health status of elderly people  
44  
45<sup>25</sup>. It was measured based on self-reports to the following question, “Would you rate health  
46  
47 as...”, with five response options provided: excellent, very good, good, fair, and poor.  
48

49  
50 Sleep duration in hours was collected using a question, “During the past month, how  
51  
52 many hours of actual sleep did you get at night (average hours for one night)? (This may be  
53  
54 shorter than the number of hours you spend in bed.)”  
55

1  
2  
3 **Covariates.** Factors that could confound the main association were identified a priori  
4 from current literature. Covariates included age, gender<sup>3</sup>, education<sup>26</sup>, and marital status<sup>3 27</sup>.  
5  
6 Consistent with a prior CHARLS publication<sup>28</sup>, education was categorized as illiterate or no  
7 formal education, some primary school but can read and write, primary school including home  
8 schooling, and middle school or above. Marital status was grouped as married versus not married.  
9  
10  
11  
12  
13

### 14 **Ethical Considerations**

15  
16  
17 The CHARLS was approved by the Ethical Review Committee. The current study is a  
18 secondary analysis of the de-identified CHARLS public data. The Ethics Review Committee  
19 granted the current study exemption from review.  
20  
21  
22

### 23 **Statistical Analysis**

24  
25  
26 **Incidence of depressive symptoms.** The incidence of depressive symptoms was  
27 analyzed taking into account the complex survey design and nonresponse rate in both estimates  
28 and the corresponding standard errors (SEs). Participants were categorized into 5-year age  
29 groups. SAS PROC SURVEYFREQ procedure was used to obtain the overall and gender  
30 specific incidence of depressive symptoms among all participants and by the 5-year age groups.  
31  
32 In addition, overall and gender-specific incidence of depressive symptoms was estimated by  
33 rural and urban areas. We estimated the incidence of four outcomes of depressive symptoms:  
34 having depressive symptoms in the first follow-up survey (2013-2014); having depressive  
35 symptoms in the second follow-up survey (2015-2016); ever having depressive symptoms in the  
36 first or the second follow-up survey; and consistently having depressive symptoms in both  
37 follow-up surveys.  
38  
39  
40  
41  
42  
43  
44  
45  
46  
47  
48  
49  
50

51 **Prospective analysis.** Baseline characteristics of the participants were summarized as  
52 frequency and percentage for categorical variables and mean and standard deviation or median  
53  
54  
55

1  
2  
3 and interquartile range for continuous variables. Associations of baseline health behaviors,  
4 including chronic conditions, overweight/obesity, sleep duration, and self-perceived health status,  
5 with the incidence of ever having depressive symptoms in 4 years of follow-up were evaluated  
6 by a multivariate logistic regression model, while controlling for all covariates as mentioned  
7 above. Odds ratios (ORs) and the corresponding 95% confidence intervals (CIs) were reported.  
8 The SAS 9.4 (SAS Institute Inc., Cary, North Carolina) was used to perform the analyses. All the  
9 p values were two-sided, and  $p < 0.05$  was considered significant.

## 19 Results

### 21 Sample Characteristics

22 A total of 10,288 participants aged 45 years or older were included in the estimate of  
23 depressive symptoms incidence. As shown in Table 1, the average age of all participants was  
24 58.5 years and roughly half participants (49.3%) were women. Most of the participants (73.3%)  
25 lived in rural areas and 60.6% participants had education of primary school or above. The  
26 majority of participants (90.0%) were married or living with a partner at the time of data  
27 collection. About a third of the participants (31.5%) were current smokers and 17.9% were  
28 current regular drinkers. Participants had an average BMI of 23.7 kg/m<sup>2</sup>. The mean duration of  
29 sleep per night was 6.7 hours, and less than 20% of participants perceived their health as very  
30 good or excellent. The mean CES-D short form score was 5.1 at baseline.

### 44 Incidence of Depressive Symptoms

45 As shown in Table 2 and in Figure 1, the incidence of ever having depressive symptoms  
46 in 4 years was 22.3% (95% CI: 21.3%-23.3%). The incidence was much higher in rural areas  
47 than that in urban areas (25.7% vs. 15.3%,  $p < 0.0001$ ). Women had higher incidence of  
48 depressive symptoms than men (27.9% vs. 16.7%,  $p < 0.0001$ ). There is no clear pattern of the  
49  
50  
51  
52  
53  
54  
55

1  
2  
3 incidence of depressive symptoms over age groups (Figure 1). The incidence was highest among  
4  
5 the 65-70 years of age group and lowest among the 45-50 years of age group.  
6  
7

### 8 **Baseline Risk Factors and Incident Depressive Symptoms**

9  
10 As shown in Table 3, in the fully adjusted multivariable logistic regression model,  
11  
12 sleeping duration and self-perceived health status were both inversely associated with the risk of  
13  
14 depressive symptoms. Specifically, participants with an hour longer of sleeping had a 10% (95%  
15  
16 CI: 7%-13%,  $p < 0.0001$ ) lower risk of developing depressive symptoms in 4 years of follow up.  
17  
18 Compared to individuals who perceived their health status as poor, those who perceived their  
19  
20 health status as fair, good, very good, and excellent had 42% (95% CI: 39%-52%), 47% (95% CI:  
21  
22 36%-57%), 64% (95% CI: 54%-72%), and 62% (95% CI: 43%-74%) lower risk of developing  
23  
24 depressive symptoms, respectively. In addition, three chronic conditions, diabetes (OR=1.19, 95%  
25  
26 CI: 1.00-1.42,  $p = 0.04$ ), chronic kidney disease (OR=1.37, 95% CI: 1.05-1.79,  $p = 0.02$ ), chronic  
27  
28 digestive disorders (OR=1.15, 95% CI: 1.01-1.31,  $p = 0.04$ ), and arthritis (OR=1.43, 95% CI:  
29  
30 1.28-1.61,  $p < 0.0001$ ) were associated with higher risk of depressive symptoms. However,  
31  
32 baseline BMI was not associated with the onset of depressive symptoms in this population  
33  
34 (OR=0.99, 95% CI: 0.97-1.01). Chronic lung disease ( $p = 0.001$ ), chronic liver disease ( $p = 0.004$ ),  
35  
36 and asthma ( $p = 0.02$ ) were positively associated with incidence of depressive disorder in the raw  
37  
38 analysis, but became non-significant in the fully adjusted model (all  $p > 0.05$ ).  
39  
40  
41  
42  
43  
44

### 45 **Discussion**

46  
47 Through analysis to data of a nationally representative sample of mid-aged and older  
48  
49 Chinese adults, we found that the incidence of depressive symptoms in a 4-year follow-up was as  
50  
51 high as 22.3%. Large disparities in the incidence of depressive symptoms were observed  
52  
53 between rural and urban areas and between men and women. Furthermore, longer sleeping  
54  
55  
56  
57  
58  
59  
60



1  
2  
3 duration and better self-perceived health status were both associated with lower risk of  
4  
5 depressive symptoms. On contrary, having diabetes and chronic kidney disease at baseline  
6  
7 increased the risk of depressive symptoms. However, baseline BMI was not associated with  
8  
9 depressive symptoms in this population.  
10

11  
12 This is the first study that examined the incidence of depressive symptoms in a nationally  
13  
14 representative population in China. Our study found that in 4 years of follow-up, as high as 22.3%  
15  
16 of the mid-aged and older Chinese adults developed depressive symptoms. Using the same  
17  
18 database, a recent study reported that the prevalence of depressive symptoms at CHARLS  
19  
20 baseline survey was up to 26.2%<sup>13</sup>. Collectively, these findings revealed that depressive  
21  
22 symptoms were a major public health challenge in China, and intervention programs should be  
23  
24 developed to reduce the burden of depressive symptoms. Furthermore, large disparities were also  
25  
26 observed between rural and urban residents and between men and women. In particular, women  
27  
28 and residents living in rural areas were at a higher risk of developing depressive symptoms. The  
29  
30 high incidence rate is not only relevant to middle-aged and older Chinese adults, it also has  
31  
32 implications for younger generations of the Chinese. Many depressive symptoms cases remained  
33  
34 undiagnosed, and even among those who were aware of the condition, very few sought  
35  
36 treatments due to cultural stigma<sup>9 10</sup>. Middle-aged and elderly grandparents are the primary  
37  
38 caregivers of infants, toddlers, and young children in rural China. Depressed caregivers were  
39  
40 more likely to show negative parenting interactions (e.g., limited facial and behavioral affect)  
41  
42 with their children, and these interactions were directly relevant for children's development<sup>29 30</sup>.  
43  
44 A strong negative correlation has been reported between the levels of depression of  
45  
46 grandmothers and the levels of developmental outcomes of the grandchildren in their care,  
47  
48 including cognitive, language, social-emotional, and motor functions<sup>31 32</sup>. Taken together,  
49  
50  
51  
52  
53  
54  
55

1  
2  
3 changes in social policies and intervention programs should be developed to address timely  
4 diagnosis and treatment of depression for these people, which will help improve young  
5  
6 children's developmental outcomes in rural China.  
7  
8  
9

10 Individuals with longer sleep duration had lower risk of depressive symptoms. This  
11 finding is in line with previous studies<sup>33 34</sup>. Sleep disorders are often the presenting and core  
12 symptoms of depression<sup>35</sup>. However, treatment of depression did not resolve sleep symptoms,  
13 which may confer a greater risk for depression recurrence and relapse<sup>35</sup>. Therefore, sleep  
14 deprivation should be at least considered as an early indicator of depressive symptoms.  
15  
16 Individuals with sleep deprivation should be aware of their high risk of depressive symptoms and  
17 manage to improve the length of their sleeping.  
18  
19  
20  
21  
22  
23  
24  
25

26 Better self-perceived health status also reduced the risk of depressive symptoms in the  
27 current study. The finding is consistent with studies among other populations<sup>36 37</sup>. Self-perceived  
28 health is a powerful indicator of the overall health status of elderly people<sup>25</sup>. Many factors,  
29 including sociodemographic characteristics, chronic disease, functional status, social  
30 relationships, neighborhood environment, and nutrition pattern, were all important determinants  
31 of self-perceived health<sup>25</sup>. These factors are also associated with depressive symptoms. The  
32 current study adjusted most of the factors, except for functional status, social relationship, and  
33 nutrition pattern, which were not available in the CHARLS database. However, poorer self-  
34 perceived health status was still significantly associated with higher risk of depressive symptoms.  
35  
36 Future studies additionally controlling for those factors will help to evaluate the contribution of  
37 those factors on the associations of self-perceived health status with depressive symptoms.  
38  
39 Furthermore, such study may also help delineate whether self-perceived health status may  
40 represent other factors that may lead to depressive symptoms. Finally, individuals with  
41  
42  
43  
44  
45  
46  
47  
48  
49  
50  
51  
52  
53  
54  
55

1  
2  
3 depressive disorders were more likely to report poor self-perceived health<sup>38 39</sup>. Therefore, there  
4  
5 might be a bidirectional association between depressive symptoms and self-perceived health.  
6

7  
8 Future studies examining the bi-directional relationship are warranted.  
9

10       Among 12 chronic conditions, baseline chronic kidney disease increased the risk of  
11  
12 depressive symptoms at follow-up. Although the underlying mechanisms have not been well  
13  
14 understood, some authors suggested that the psychosocial and biologic changes in dialysis may  
15  
16 explain this relationship<sup>40</sup>. In addition to chronic kidney disease, baseline diabetes also  
17  
18 conferred a higher risk of symptoms of depression over time in this study. Similar results were  
19  
20 reported in a meta-analysis of 11 studies, which found that people with diabetes at baseline had a  
21  
22 24% higher risk of developing depression at follow-up compared to those without diabetes<sup>41</sup>. In  
23  
24 addition, high prevalence of depression among people with diabetes and/or chronic kidney  
25  
26 disease has also been observed in cross-sectional studies<sup>42-44</sup>. In concordance with these findings,  
27  
28 this study added further evidence that compared to other chronic conditions at baseline, baseline  
29  
30 chronic disease and diabetes were more likely to be associated with depressive symptoms over  
31  
32 time in a population of mid-aged and older Chinese population.  
33  
34  
35  
36

37       Overweight/obesity is well established to interfere with mental health, with depressive  
38  
39 symptoms being more common among overweight/obese individuals than their normal-weight  
40  
41 counterparts, especially in overweight/obese women<sup>45 46</sup>. A meta-analysis of longitudinal studies  
42  
43 further confirmed this relationship, in which excess weight at baseline increased a higher risk for  
44  
45 incident depression at follow-up<sup>47</sup>. In contrast to these findings from Western and European  
46  
47 countries, using data from a prospective survey of a large, representative sample of mid-aged and  
48  
49 elderly community-dwelling residents in Mainland China, we did not find a relationship between  
50  
51 baseline BMI and subsequent depressive symptoms over time. These inconsistent findings may  
52  
53  
54  
55  
56

1  
2  
3 suggest that because participants in the current study were predominantly low in BMI at baseline  
4  
5 (mean BMI was 23.7 kg/m<sup>2</sup>), their likelihood of experiencing depressive symptoms may have  
6  
7 been lower compared to those participants reported in Luppino et al <sup>47</sup>. However, these are  
8  
9 preliminary findings that need to be further investigated in future prospective studies in this  
10  
11 population.  
12  
13

14  
15 The study has several important strengths. First, to the best of our knowledge, this is the  
16  
17 first study to estimate incidence of depressive symptoms in a nationally representative sample of  
18  
19 middle-aged and older Chinese adults. Previous studies have focused on the estimation of  
20  
21 depressive symptoms prevalence <sup>48 49</sup> or investigated the incidence of depressive symptoms in a  
22  
23 regional sample <sup>50</sup>. Second, since the sample was representative of community-dwelling mid-  
24  
25 aged and older Chinese adults, the results can be generalized to mid-aged and older Chinese  
26  
27 adults. Third, a Chinese specific cut-off point of the CES-D short form score for depressive  
28  
29 symptoms has been used, and the cut-off point was validated among middle-aged and older  
30  
31 Chinese adults <sup>21</sup>. Therefore, our study provided more reliable estimate of the incidence of  
32  
33 depressive symptoms. Finally, strict quality control measures, including GPS matching, data  
34  
35 checking, recording and checking interviews, and calling back participants, were implemented at  
36  
37 each stage of the study to ensure data quality and reliability.  
38  
39  
40  
41

42  
43 There were also some limitations in this study that should be acknowledged. First,  
44  
45 depressive symptoms were based on self-reports instead of clinically diagnosis. Therefore,  
46  
47 information bias may be present. However, with longitudinal design, information bias in the  
48  
49 current study was very likely to be non-differential. Since non-differential misclassification  
50  
51 generally bias the association estimates towards the null, our study findings were more robust.  
52  
53 Second, nighttime sleep duration was also measured based on self-reports. The use of self-  
54  
55

1  
2  
3 reported measures in the CHARLS surveys may have biased study results, since participants may  
4 consistently under- or overestimate their nighttime sleep duration <sup>51</sup>. Objective or direct  
5  
6 measures of sleep duration should be used to increase precision and accuracy of self-report  
7  
8 assessment. Finally, this study was a prospective analysis of baseline risk factors with depressive  
9  
10 symptoms at follow-up, and no causal associations between these predictors and depressive  
11  
12 symptoms can be drawn from the analysis.  
13  
14  
15

16  
17 The findings of the current study have important implications for clinical practice. Health  
18 care professionals are especially encouraged to address the needs for better mental health in  
19 elderly population <sup>52</sup>. In view of the high incidence of depressive symptoms (22.3%) among mid-  
20 aged and elderly Chinese, the findings of this study highlight the importance of developing an  
21 appropriate screening test to identify depressive symptoms for those who are vulnerable and  
22 ensure these individuals can receive early interventions for depressive symptoms. The screening  
23 test should include items such as areas of living (rural or urban areas), gender, age groups,  
24 nighttime sleep duration, self-perceived health status, and certain chronic conditions, especially  
25 chronic kidney disease and diabetes. In addition, intervention strategies that address short  
26 nighttime sleep duration may be used to alleviate depressive symptoms and improve mental  
27 health in this population. Intervention programs should also be prioritized to target at specific  
28 populations, such as women and residents living in rural areas, as these populations were at a  
29 higher risk of developing depressive symptoms. Finally, new patients with chronic kidney  
30 disease and diabetes should be screened for depression using the CES-D short form at initial visit.  
31  
32 Persons with depressive symptoms (a score of 12 or higher) should then be assessed by a  
33 clinician using the structured clinical interview for Diagnostic and Statistical Manual of Mental  
34 Disorders, Fifth Edition. Potential participants with serious depressive symptoms should be  
35  
36  
37  
38  
39  
40  
41  
42  
43  
44  
45  
46  
47  
48  
49  
50  
51  
52  
53  
54  
55  
56  
57  
58  
59  
60

1  
2  
3 referred immediately to a mental health professional. Individuals with these two conditions are  
4 particularly vulnerable to the deleterious effects of affective symptoms, since symptoms of  
5 depression is a known risk factor for noncompliance with medical treatment and adverse health  
6 outcomes<sup>53 54</sup>.  
7  
8  
9  
10

### 11 12 **Conclusions**

13  
14 To conclude, our study found a high incidence of depressive symptoms in 4 years of  
15 follow-up among a nationally representative mid-aged and older Chinese population. In addition,  
16 great disparities in the incidence of depressive symptoms were observed between individuals  
17 lived in rural and urban areas and between men and women. Furthermore, we identified that  
18 worse self-perceived health, shorter duration of sleeping, diabetes and chronic kidney disease at  
19 baseline increased the risk for depressive symptoms. These findings supported the importance of  
20 baseline status to longitudinal changes in depressive symptoms. Thus, interventions for  
21 vulnerable mid-aged and older adults should focus on addressing short nighttime sleep duration.  
22 These findings also help identify individuals at higher risk for depressive symptoms, such as  
23 those with chronic kidney disease and diabetes, or women and residents living in rural areas, so  
24 that early interventions can be implemented to prevent depressive symptoms.  
25  
26  
27  
28  
29  
30  
31  
32  
33  
34  
35  
36  
37  
38  
39

### 40 **Figure Legend**

41  
42 Figure 1. The Incidence of Depressive Symptoms in 4 Years of Follow-up among  
43 Participants of the CHARLS  
44  
45  
46  
47  
48  
49  
50  
51  
52  
53  
54  
55  
56  
57  
58  
59  
60

### **Contributorship Statement**

All authors contribute to the conception and design of this study. YW, YY, and DW were responsible for the design, analysis, drafting and revision of this manuscript. CL and JL were responsible for interpretation of data and preparation of the manuscript.

### **Competing Interests Statement**

None declared.

### **Funding Statement**

This work was supported by the Sichuan Science and Technology Program grant number 2018JY0306 to Dr. Dongmei Wu. The CHARLS is funded by Peking University, the National Natural Science Foundation of China, the Behavioral and Social Research Division of the National Institute on Aging, and the World Bank.

### **Acknowledgments**

The authors would gratefully acknowledge the assistance Dr. Tingting Liu, an assistant professor at University of Arkansas Eleanor Mann School of Nursing for editing the manuscript.

### **Patient Consent for Publication**

Not required.

### **Data Sharing Statement**

The study used a public data from the CHARLS that were obtained from the CHARLS home page at <http://charls.pku.edu.cn/en>.

## References

1. Qin X, Wang S, Hsieh C. The prevalence of depression and depressive symptoms among adults in China: Estimation based on a National Household Survey. *China Economic Review* 2016 doi: 10.1016/j.chieco.2016.04.001
2. World Health Organization. Depression and other common mental disorders: Global health estimates. Geneva, Swiss: World Health Organization 2017.
3. Lei X, Sun X, Strauss J, et al. Depressive symptoms and SES among the mid-aged and elderly in China: Evidence from the China Health and Retirement Longitudinal Study national baseline. *Social Science & Medicine* 2014;120:224-32. doi: 10.1016/j.socscimed.2014.09.028 [published Online First: 2014/09/28]
4. Diniz BS, Butters MA, Albert SM, et al. Late-life depression and risk of vascular dementia and Alzheimer's disease: Systematic review and meta-analysis of community-based cohort studies. *The British journal of psychiatry : the journal of mental science* 2013;202:329-35. doi: 10.1192/bjp.bp.112.118307 [published Online First: 2013/05/03]
5. Sivertsen H, Bjørkløf GH, Engedal K, et al. Depression and quality of life in older persons: A review. *Dementia and geriatric cognitive disorders* 2015;40:311-39. doi: 10.1159/000437299
6. Wang CW, Chan CL, Yip PS. Suicide rates in China from 2002 to 2011: An update. *Social psychiatry and psychiatric epidemiology* 2014;49:929-41. doi: 10.1007/s00127-013-0789-5 [published Online First: 2013/11/19]
7. Holzapfel N, Lowe B, Wild B, et al. Self-care and depression in patients with chronic heart failure. *Heart & Lung* 2009;38:392-97. doi: 10.1016/j.hrtlng.2008.11.001 [published Online First: 2009/09/17]



- 1  
2  
3 8. Gonzalez JS, Safren SA, Delahanty LM, et al. Symptoms of depression prospectively predict  
4  
5 poorer self-care in patients with type 2 diabetes. *Diabetetic Medicine* 2008;25:1102-07.  
6  
7 doi: 10.1111/j.1464-5491.2008.02535.x [published Online First: 2009/02/03]  
8  
9
- 10 9. Zeng B, Sun W, Gary RA, et al. Towards a conceptual model of diabetes self-management  
11  
12 among Chinese immigrants in the United States. *International journal of environmental*  
13  
14 *research and public health* 2014;11:6727-42. doi: 10.3390/ijerph110706727 [published  
15  
16 Online First: 2014/07/01]  
17  
18
- 19 10. He P, Hu Y, Li C, et al. Predictors of depressive symptoms among mid-aged and older men  
20  
21 with diabetes in China. *Research and theory for nursing practice* 2019;33(1):6-22. doi:  
22  
23 10.1891/1541-6577.33.1.6 [published Online First: 2019/02/24]  
24  
25
- 26 11. Xu Y, Yang J, Gao J, et al. Decomposing socioeconomic inequalities in depressive  
27  
28 symptoms among the elderly in China. *BMC public health* 2016;16:1214. doi:  
29  
30 10.1186/s12889-016-3876-1 [published Online First: 2016/12/03]  
31  
32
- 33 12. United Nations Department of Economic and Social Affairs/Population Division. World  
34  
35 population prospects: The 2012 revision, volume II: Demographic profiles. New York, NY:  
36  
37 United Nations 2012.  
38  
39
- 40 13. Li C, Miles T, Shen L, et al. Early-life exposure to severe famine and subsequent risk of  
41  
42 depressive symptoms in late adulthood: The China Health and Retirement Longitudinal  
43  
44 Study. *British Journal of Psychiatry* 2018;213:579-86. doi: 10.1192/bjp.2018.116  
45  
46 [published Online First: 2018/08/31]  
47  
48
- 49 14. Yu J, Li J, Cuijpers P, et al. Prevalence and correlates of depressive symptoms in Chinese  
50  
51 older adults: A population-based study. *International journal of geriatric psychiatry*  
52  
53 2012;27:305-12. doi: 10.1002/gps.2721 [published Online First: 2011/05/04]  
54  
55  
56

- 1  
2  
3 15. Alvaro PK, Roberts RM, Harris JK. A systematic review assessing bidirectionality between  
4  
5 sleep disturbances, anxiety, and depression. *Sleep* 2013;36:1059-68. doi:  
6  
7 10.5665/sleep.2810 [published Online First: 2013/07/03]  
8  
9
- 10 16. Wilson-Genderson M, Heid AR, Pruchno R. Onset of multiple chronic conditions and  
11  
12 depressive symptoms: A life events perspective. *Innovation in Aging* 2017;1:igx022-  
13  
14 igx22. doi: 10.1093/geroni/igx022  
15  
16
- 17 17. Qian J, Li N, Ren X. Obesity and depressive symptoms among Chinese people aged 45 and  
18  
19 over. *Scientific reports* 2017;7:45637. doi: 10.1038/srep45637  
20  
21
- 22 18. Zhao Y, Hu Y, Smith JP, et al. Cohort profile: The China Health and Retirement  
23  
24 Longitudinal Study (CHARLS). *International journal of epidemiology* 2014;43:61-68.  
25  
26 doi: 10.1093/ije/dys203 [published Online First: 2012/12/18]  
27  
28
- 29 19. Li C, Liu T, Sun W, et al. Prevalence and risk factors of arthritis in a middle-aged and older  
30  
31 Chinese population: The China Health and Retirement Longitudinal Study.  
32  
33 *Rheumatology (Oxford, England)* 2015;54:697-706. doi: 10.1093/rheumatology/keu391  
34  
35 [published Online First: 2014/10/08]  
36  
37
- 38 20. Andresen EM, Malmgren JA, Carter WB, et al. Screening for depression in well older adults:  
39  
40 Evaluation of a short form of the CES-D (Center for Epidemiologic Studies Depression  
41  
42 Scale). *American journal of preventive medicine* 1994;10(2):77-84. [published Online  
43  
44 First: 1994/03/01]  
45  
46
- 47 21. Chen H, Mui AC. Factorial validity of the Center for Epidemiologic Studies Depression  
48  
49 Scale short form in older population in China. *International psychogeriatrics / IPA*  
50  
51 2014;26:49-57. doi: 10.1017/s1041610213001701 [published Online First: 2013/10/16]  
52  
53  
54  
55  
56  
57  
58  
59  
60

- 1  
2  
3 22. Whelton PK, Carey RM, Aronow WS, et al. 2017  
4  
5 ACC/AHA/AAPA/ABC/ACPM/AGS/APhA/ASH/ASPC/NMA/PCNA guideline for the  
6  
7 prevention, detection, evaluation, and management of high blood pressure in adults: A  
8  
9 report of the American College of Cardiology/American Heart Association Task Force on  
10  
11 Clinical Practice Guidelines. *Journal of the American College of Cardiology*  
12  
13 2018;71:e127-e248. doi: 10.1016/j.jacc.2017.11.006 [published Online First: 2017/11/18]  
14  
15  
16  
17 23. Zhao Y, Crimmins E, Hu P, et al. China Health And Retirement Longitudinal Study: 2011-  
18  
19 2012 national baseline blood data users' guide. Beijing, China: China Center for  
20  
21 Economic Research, Peking Universtiy 2014.  
22  
23  
24 24. American Diabetes Association. 2. Classification and diagnosis of diabetes: Standards of  
25  
26 medical care in diabetes-2018. *Diabetes care* 2018;41:S13-S27. doi: 10.2337/dc18-S002  
27  
28 [published Online First: 2017/12/10]  
29  
30  
31 25. Machón M, Vergara I, Dorronsoro M, et al. Self-perceived health in functionally independent  
32  
33 older people: Associated factors. *BMC geriatrics* 2016;16:66. doi: 10.1186/s12877-016-  
34  
35 0239-9 [published Online First: 2016/03/11]  
36  
37  
38 26. Bjelland I, Krokstad S, Mykletun A, et al. Does a higher educational level protect against  
39  
40 anxiety and depression? The HUNT study. *Social science & medicine (1982)*  
41  
42 2008;66:1334-45. doi: 10.1016/j.socscimed.2007.12.019 [published Online First:  
43  
44 2008/02/01]  
45  
46  
47 27. Cheng HG, Chen S, McBride O, et al. Prospective relationship of depressive symptoms,  
48  
49 drinking, and tobacco smoking among middle-aged and elderly community-dwelling  
50  
51 adults: Results from the China Health and Retirement Longitudinal Study (CHARLS).  
52  
53  
54  
55  
56  
57  
58  
59  
60

- 1  
2  
3 *Journal of affective disorders* 2016;195:136-43. doi: 10.1016/j.jad.2016.02.023  
4  
5 [published Online First: 2016/02/20]  
6  
7
- 8 28. Zuo M, Gan C, Liu T, et al. Physical predictors of cognitive function in individuals with  
9  
10 hypertension: Evidence from the CHARLS baseline survey. *Western journal of nursing*  
11  
12 *research* 2018 doi: 10.1177/0193945918770794 [published Online First: 2018/05/11]  
13  
14
- 15 29. Lovejoy MC, Graczyk PA, O'Hare E, et al. Maternal depression and parenting behavior: A  
16  
17 meta-analytic review. *Clinical psychology review* 2000;20(5):561-92. [published Online  
18  
19 First: 2000/06/22]  
20  
21
- 22 30. Pelaez M, Field T, Pickens JN, et al. Disengaged and authoritarian parenting behavior of  
23  
24 depressed mothers with their toddlers. *Infant behavior & development* 2008;31(1):145-8.  
25  
26 doi: 10.1016/j.infbeh.2007.06.002 [published Online First: 2007/07/27]  
27  
28
- 29 31. Yue A, Gao J, Yang M, et al. Caregiver depression and early child development: A mixed-  
30  
31 methods study from rural China. *Frontiers in psychology* 2018;9:2500. doi:  
32  
33 10.3389/fpsyg.2018.02500 [published Online First: 2019/01/09]  
34  
35
- 36 32. Zhang S, Dang R, Yang N, et al. Effect of caregiver's mental health on early childhood  
37  
38 development across different rural communities in China. *International journal of*  
39  
40 *environmental research and public health* 2018;15(11) doi: 10.3390/ijerph15112341  
41  
42 [published Online First: 2018/10/27]  
43  
44
- 45 33. Sun Y, Shi L, Bao Y, et al. The bidirectional relationship between sleep duration and  
46  
47 depression in community-dwelling middle-aged and elderly individuals: Evidence from a  
48  
49 longitudinal study. *Sleep medicine* 2018;52:221-29. doi: 10.1016/j.sleep.2018.03.011  
50  
51 [published Online First: 2018/06/05]  
52  
53  
54  
55  
56  
57  
58  
59  
60

- 1  
2  
3 34. Li Y, Wu Y, Zhai L, et al. Longitudinal association of sleep duration with depressive  
4  
5 symptoms among middle-aged and older Chinese. *Scientific reports* 2017;7:11794. doi:  
6  
7 10.1038/s41598-017-12182-0 [published Online First: 2017/09/20]  
8  
9  
10 35. Nutt D, Wilson S, Paterson L. Sleep disorders as core symptoms of depression. *Dialogues in*  
11  
12 *clinical neuroscience* 2008;10(3):329-36. [published Online First: 2008/11/05]  
13  
14  
15 36. Cole MG, Dendukuri N. Risk factors for depression among elderly community subjects: A  
16  
17 systematic review and meta-analysis. *American Journal of Psychiatry* 2003;160:1147-56.  
18  
19 doi: 10.1176/appi.ajp.160.6.1147 [published Online First: 2003/06/05]  
20  
21  
22 37. Conti CL, Barbosa WM, Simão JBP, et al. Pesticide exposure, tobacco use, poor self-  
23  
24 perceived health and presence of chronic disease are determinants of depressive  
25  
26 symptoms among coffee growers from Southeast Brazil. *Psychiatry Res* 2018;260:187-92.  
27  
28 doi: 10.1016/j.psychres.2017.11.063 [published Online First: 2017/12/01]  
29  
30  
31 38. Leão T, Perelman J. Depression symptoms as mediators of inequalities in self-reported health:  
32  
33 the case of Southern European elderly. *J Public Health (Oxf)* 2018;40(4):756-63. doi:  
34  
35 10.1093/pubmed/fox173  
36  
37  
38 39. Alarcão V, Madeira T, Peixoto-Plácido C, et al. Gender differences in psychosocial  
39  
40 determinants of self-perceived health among Portuguese older adults in nursing homes.  
41  
42 *Aging Ment Health* 2018:1-8. doi: 10.1080/13607863.2018.1471583 [published Online  
43  
44 First: 2018/05/23]  
45  
46  
47 40. Sonikian M, Metaxaki P, Papavasileiou D, et al. Effects of interleukin-6 on depression risk in  
48  
49 dialysis patients. *American journal of nephrology* 2010;31:303-08. doi:  
50  
51 10.1159/000285110 [published Online First: 2010/02/18]  
52  
53  
54  
55  
56  
57  
58  
59  
60

- 1  
2  
3 41. Nouwen A, Winkley K, Twisk J, et al. Type 2 diabetes mellitus as a risk factor for the onset  
4  
5 of depression: A systematic review and meta-analysis. *Diabetologia* 2010;53:2480-86.  
6  
7 doi: 10.1007/s00125-010-1874-x [published Online First: 2010/08/17]  
8  
9
- 10 42. Anderson RJ, Freedland KE, Clouse RE, et al. The prevalence of comorbid depression in  
11  
12 adults with diabetes: A meta-analysis. *Diabetes care* 2001;24(6):1069-78. [published  
13  
14 Online First: 2001/05/26]  
15  
16
- 17 43. Palmer S, Vecchio M, Craig JC, et al. Prevalence of depression in chronic kidney disease:  
18  
19 Systematic review and meta-analysis of observational studies. *Kidney international*  
20  
21 2013;84:179-91. doi: 10.1038/ki.2013.77 [published Online First: 2013/03/15]  
22  
23
- 24 44. Roy T, Lloyd CE. Epidemiology of depression and diabetes: A systematic review. *Journal of*  
25  
26 *affective disorders* 2012;142 Suppl:S8-S21. doi: 10.1016/s0165-0327(12)70004-6  
27  
28 [published Online First: 2012/10/25]  
29  
30
- 31 45. Atlantis E, Baker M. Obesity effects on depression: Systematic review of epidemiological  
32  
33 studies. *International journal of obesity (2005)* 2008;32:881-91. doi: 10.1038/ijo.2008.54  
34  
35 [published Online First: 2008/04/17]  
36  
37
- 38 46. de Wit L, Luppino F, van Straten A, et al. Depression and obesity: A meta-analysis of  
39  
40 community-based studies. *Psychiatry research* 2010;178:230-35. doi:  
41  
42 10.1016/j.psychres.2009.04.015 [published Online First: 2010/05/14]  
43  
44
- 45 47. Luppino FS, de Wit LM, Bouvy PF, et al. Overweight, obesity, and depression: A systematic  
46  
47 review and meta-analysis of longitudinal studies. *Archives of general psychiatry*  
48  
49 2010;67:220-29. doi: 10.1001/archgenpsychiatry.2010.2 [published Online First:  
50  
51 2010/03/03]  
52  
53  
54  
55  
56  
57  
58  
59  
60

- 1  
2  
3 48. Lee S, Tsang A, Huang YQ, et al. The epidemiology of depression in metropolitan China.  
4  
5 *Psychol Med* 2009;39(5):735-47. doi: 10.1017/S0033291708004091 [published Online  
6  
7 First: 2008/08/20]  
8  
9
- 10 49. Charlson FJ, Baxter AJ, Cheng HG, et al. The burden of mental, neurological, and substance  
11  
12 use disorders in China and India: a systematic analysis of community representative  
13  
14 epidemiological studies. *Lancet* 2016 doi: 10.1016/S0140-6736(16)30590-6  
15  
16
- 17 50. Wang T, Xiao S, Yang C, et al. Prevalence and incidence of depression disorder and  
18  
19 cognitive impairment in the elderly in Shanghai, China. *Alzheimer's & Dementia*  
20  
21 2015;11(7):P832-P33.  
22  
23
- 24 51. Li J, Cacchione PZ, Hodgson N, et al. Afternoon napping and cognition in Chinese older  
25  
26 adults: Findings from the China Health and Retirement Longitudinal Study Baseline  
27  
28 Assessment. *Journal of American Geriatrics Society* 2017;65:373-80. doi:  
29  
30 10.1111/jgs.14368 [published Online First: 2016/12/21]  
31  
32
- 33 52. Avasthi A, Grover S. Clinical practice guidelines for management of depression in elderly.  
34  
35 *Indian journal of psychiatry* 2018;60:S341-S62. doi: 10.4103/0019-5545.224474  
36  
37 [published Online First: 2018/03/15]  
38  
39
- 40 53. Zhang Y, Ting RZ, Yang W, et al. Depression in Chinese patients with type 2 diabetes:  
41  
42 Associations with hyperglycemia, hypoglycemia, and poor treatment adherence. *Journal*  
43  
44 *of diabetes* 2015;7:800-8008. doi: 10.1111/1753-0407.12238 [published Online First:  
45  
46 2014/10/29]  
47  
48
- 49 54. Fischer MJ, Kimmel PL, Greene T, et al. Elevated depressive affect is associated with  
50  
51 adverse cardiovascular outcomes among African Americans with chronic kidney disease.  
52  
53  
54  
55  
56  
57  
58  
59  
60

1  
2  
3 *Kidney international* 2011;80:670-78. doi: 10.1038/ki.2011.153 [published Online First:  
4  
5 2011/06/03]  
6  
7  
8  
9  
10  
11  
12  
13  
14  
15  
16  
17  
18  
19  
20  
21  
22  
23  
24  
25  
26  
27  
28  
29  
30  
31  
32  
33  
34  
35  
36  
37  
38  
39  
40  
41  
42  
43  
44  
45  
46  
47  
48  
49  
50  
51  
52  
53  
54  
55  
56  
57  
58  
59  
60

For peer review only



## Tables

**Table 1. Baseline characteristics of the CHARLS participants free of depressive symptoms**

| Variable                                       | Distribution   |
|------------------------------------------------|----------------|
| N                                              | 10,288         |
| age, years, mean (SD)                          | 58.5 (9.8)     |
| Male, n (%)                                    | 5845 (50.7%)   |
| Living in rural areas, n (%)                   | 8,440 (73.3%)  |
| Education, n (%)                               |                |
| <i>No formal education or illiterate</i>       | 2,736 (23.7%)  |
| <i>Some primary school</i>                     | 1,804 (15.7%)  |
| <i>Finished primary school</i>                 | 2,590 (22.5%)  |
| <i>Junior high school or above</i>             | 4,394 (38.1%)  |
| Currently married, n (%)                       | 10,375 (90.0%) |
| Smoking status, n (%)                          |                |
| <i>Current smoker</i>                          | 3,629 (31.5%)  |
| <i>Former smoker</i>                           | 1,034 (9.0%)   |
| <i>Never smoking</i>                           | 6,868 (60.0%)  |
| Drinking status, n (%)                         |                |
| <i>Regular drinkers</i>                        | 1,951 (17.9%)  |
| <i>Occasional drinkers</i>                     | 476 (4.4%)     |
| <i>Former drinkers</i>                         | 646 (5.9%)     |
| <i>Never drinking</i>                          | 7,833 (71.8%)  |
| Weight, kg, mean (SD)                          | 60 (11.8)      |
| Height, m, mean (SD)                           | 1.6 (0.1)      |
| Body mass index, kg/m <sup>2</sup> , mean (SD) | 23.7 (4)       |
| Sleeping duration, hours, mean (SD)            | 6.7 (1.7)      |
| CES-D short form score                         | 5.1 (3.3)      |
| Self-perceived health status, n (%)            |                |
| <i>Excellent</i>                               | 483 (4.2%)     |
| <i>Very good</i>                               | 1,744 (15.1%)  |
| <i>Good</i>                                    | 4,136 (35.9%)  |
| <i>Fair</i>                                    | 3,977 (34.5%)  |
| <i>Poor</i>                                    | 1,187 (10.3%)  |
| Chronic conditions, n (%)                      |                |
| <i>Hypertension</i>                            | 4,045 (40.3%)  |
| <i>Dyslipidemia</i>                            | 1,016 (9.0%)   |
| <i>Diabetes</i>                                | 1,210 (15.0%)  |
| <i>Cancer</i>                                  | 97 (0.8%)      |
| <i>Liver disease</i>                           | 387 (3.4%)     |
| <i>Heart disease</i>                           | 1,162 (10.1%)  |
| <i>Stroke</i>                                  | 188 (1.6%)     |
| <i>Kidney disease</i>                          | 563 (4.9%)     |

|                                 |               |
|---------------------------------|---------------|
| <i>Gastrointestinal disease</i> | 2,180 (18.9%) |
| <i>Dementia</i>                 | 105 (0.9%)    |
| <i>Arthritis</i>                | 3,221 (28.0%) |
| <i>Asthma</i>                   | 312 (2.7%)    |

*Note.* CES-D=Center for Epidemiologic Study of Depression short form; SD=standard deviation.

For peer review only

**Table 2. Incidence of depressive symptoms among the CHARLS participants**

|         | Ever having depressive Symptoms | Depressive symptoms in both visits 2 & 3 | Depressive symptoms in 2 years | Depressive symptoms in 4 years |
|---------|---------------------------------|------------------------------------------|--------------------------------|--------------------------------|
| Overall | 22.3 (21.3-23.3)                | 4.4 (4.0-4.9)                            | 13.2 (12.5-14.1)               | 16.8 (15.9-17.7)               |
| Rural   | 25.7 (24.6-26.8)                | 5.3 (4.8-5.8)                            | 15.3 (14.3-16.2)               | 18.8 (17.8-19.8)               |
| Urban   | 15.3 (13.4-17.2)                | 2.6 (1.9-3.3)                            | 9.0 (7.4-10.6)                 | 12.2 (10.4-14.1)               |
| Men     | 16.7 (15.5-17.9)                | 3.0 (2.5-3.5)                            | 9.9 (9.0-10.9)                 | 12.2 (11.1-13.2)               |
| Women   | 27.9 (26.4-29.4)                | 5.8 (5.1-6.6)                            | 16.6 (15.3-17.9)               | 21.5 (20.1-22.9)               |

For peer review only

**Table 3. Raw and multi-variables adjusted associations with the incidence of depressive symptoms in 4 years of follow-up.**

| Variables                                         | Multi-Variate Adjusted |                  | Raw Association  |                  |
|---------------------------------------------------|------------------------|------------------|------------------|------------------|
|                                                   | OR (95% CI)            | P                | OR (95% CI)      | P                |
| Age, per year older                               | 0.99 (0.98-0.99)       | <b>0.001</b>     | 0.99 (0.99-1.00) | 0.59             |
| Male vs. Female                                   | 0.60 (0.51-0.71)       | <b>&lt;.0001</b> | 0.51 (0.46-0.56) | <b>&lt;.0001</b> |
| Education level                                   |                        |                  |                  |                  |
| <i>No formal education or illiterate</i>          | ref.                   | <b>&lt;.0001</b> | ref.             | <b>&lt;.0001</b> |
| <i>Some primary school</i>                        | 1.06 (0.90-1.25)       |                  | 0.93 (0.80-1.08) |                  |
| <i>Finished primary school</i>                    | 0.83 (0.71-0.97)       |                  | 0.67 (0.57-0.77) |                  |
| <i>Junior high school or above</i>                | 0.71 (0.61-0.84)       |                  | 0.48 (0.42-0.55) |                  |
| Rural vs. Urban                                   | 1.61 (1.38-1.88)       | <b>&lt;.0001</b> | 1.72 (1.50-1.96) | <b>&lt;.0001</b> |
| Not married vs Married                            | 1.25 (1.04-1.51)       | <b>0.02</b>      | 1.28 (1.08-1.51) | <b>0.004</b>     |
| Smoking status                                    |                        |                  |                  |                  |
| <i>Non-smokers</i>                                | ref.                   |                  | ref.             |                  |
| <i>Current smokers</i>                            | 1.02 (0.86-1.20)       | <b>0.03</b>      | 0.51 (0.41-0.62) | <b>&lt;.0001</b> |
| <i>Former smokers</i>                             | 0.75 (0.59-0.96)       |                  | 0.68 (0.60-0.76) |                  |
| Drinking status                                   |                        |                  |                  |                  |
| <i>Never drinkers</i>                             | Ref.                   |                  | ref.             |                  |
| <i>Former drinkers</i>                            | 1.02 (0.80-1.30)       | 0.15             | 0.84 (0.67-1.04) | <b>&lt;.0001</b> |
| <i>Occasional drinkers</i>                        | 0.79 (0.59-1.06)       |                  | 0.59 (0.45-0.78) |                  |
| <i>Regular drinkers</i>                           | 0.85 (0.71-1.01)       |                  | 0.59 (0.51-0.68) |                  |
| Body mass index, per 1 kg/m <sup>2</sup> increase | 0.99 (0.98-1.01)       | 0.20             | 0.99 (0.98-1.00) | 0.14             |
| Self-perceived health status                      |                        |                  |                  |                  |
| <i>Excellent</i>                                  | 0.36 (0.25-0.52)       | <b>&lt;.0001</b> | 0.28 (0.20-0.39) | <b>&lt;.0001</b> |
| <i>Very good</i>                                  | 0.36 (0.29-0.45)       |                  | 0.28 (0.23-0.35) |                  |
| <i>Good</i>                                       | 0.53 (0.44-0.63)       |                  | 0.45 (0.38-0.53) |                  |
| <i>Fair</i>                                       | 0.61 (0.52-0.73)       |                  | 0.56 (0.48-0.66) |                  |
| <i>Poor</i>                                       | ref.                   |                  | ref.             |                  |
| Sleep duration, per hour longer                   | 0.89 (0.87-0.92)       | <b>&lt;.0001</b> | 0.88 (0.85-0.90) | <b>&lt;.0001</b> |
| Hypertension (Y vs. N)                            | 1.07 (0.95-1.21)       | 0.25             | 1.07 (0.96-1.18) | 0.22             |
| Dyslipidemia (Y vs. N)                            | 0.85 (0.69-1.04)       | 0.12             | 0.91 (0.76-1.09) | 0.29             |
| Diabetes (Y vs. N)                                | 1.19 (1.00-1.42)       | <b>0.04</b>      | 1.11 (0.95-2.30) | 0.19             |
| Cancer (Y vs. N)                                  | 0.92 (0.48-1.77)       | 0.80             | 1.17 (0.65-2.12) | 0.61             |
| Chronic Lung Disease (Y vs. N)                    | 1.18 (0.97-1.44)       | 0.10             | 1.33 (1.12-1.58) | <b>0.001</b>     |
| Chronic Liver Disease (Y vs. N)                   | 0.90 (0.67-1.22)       | 0.51             | 1.04 (0.79-1.37) | 0.81             |
| Heart Disease (Y vs. N)                           | 1.06 (0.88-1.28)       | 0.54             | 1.27 (1.08-1.49) | <b>0.004</b>     |
| Stroke (Y vs. N)                                  | 0.88 (0.56-1.39)       | 0.59             | 1.12 (0.75-1.66) | 0.58             |
| Chronic Kidney Disease (Y vs. N)                  | 1.32 (1.04-1.67)       | <b>0.02</b>      | 1.45 (1.16-1.80) | <b>0.001</b>     |
| Chronic Digestive Disorders (Y vs. N)             | 1.15 (1.01-1.31)       | <b>0.04</b>      | 1.43 (1.26-1.61) | <b>&lt;.0001</b> |
| Psychological Disorders (Y vs. N)                 | 1.00 (0.53-1.89)       | 0.99             | 1.44 (0.81-2.56) | 0.22             |
| Dementia (Y vs. N)                                | 1.31 (0.72-2.38)       | 0.37             | 1.15 (0.67-1.97) | 0.62             |
| Arthritis (Y vs. N)                               | 1.43 (1.28-1.61)       | <b>&lt;.0001</b> | 1.72 (1.54-1.91) | <b>&lt;.0001</b> |
| Asthma (Y vs. N)                                  | 1.25 (0.90-1.75)       | 0.19             | 1.43 (1.06-1.91) | <b>0.02</b>      |

1  
2  
3  
4  
5  
6  
7  
8  
9  
10  
11  
12  
13  
14  
15  
16  
17  
18  
19  
20  
21  
22  
23  
24  
25  
26  
27  
28  
29  
30  
31  
32  
33  
34  
35  
36  
37  
38  
39  
40  
41  
42  
43  
44  
45  
46  
47  
48  
49  
50  
51  
52  
53  
54  
55  
56  
57  
58  
59  
60

Note. CI=confidence interval; OR=odds ratio

For peer review only

1  
2  
3  
4  
5  
6  
7  
8  
9  
10  
11  
12  
13  
14  
15  
16  
17  
18  
19  
20  
21  
22  
23  
24  
25  
26  
27  
28  
29  
30  
31  
32  
33  
34  
35  
36  
37  
38  
39  
40  
41  
42  
43  
44  
45  
46  
47  
48  
49  
50  
51  
52  
53  
54  
55  
56  
57  
58  
59  
60



254x190mm (300 x 300 DPI)

**STROBE 2007 (v4) Statement—Checklist of items that should be included in reports of cohort studies**

| Section/Topic                | Item # | Recommendation                                                                                                                                                                       | Reported on page # |
|------------------------------|--------|--------------------------------------------------------------------------------------------------------------------------------------------------------------------------------------|--------------------|
| <b>Title and abstract</b>    | 1      | (a) Indicate the study’s design with a commonly used term in the title or the abstract                                                                                               | 3                  |
|                              |        | (b) Provide in the abstract an informative and balanced summary of what was done and what was found                                                                                  | 3                  |
| <b>Introduction</b>          |        |                                                                                                                                                                                      |                    |
| Background/rationale         | 2      | Explain the scientific background and rationale for the investigation being reported                                                                                                 | 6-7                |
| Objectives                   | 3      | State specific objectives, including any prespecified hypotheses                                                                                                                     | 7                  |
| <b>Methods</b>               |        |                                                                                                                                                                                      |                    |
| Study design                 | 4      | Present key elements of study design early in the paper                                                                                                                              | 8                  |
| Setting                      | 5      | Describe the setting, locations, and relevant dates, including periods of recruitment, exposure, follow-up, and data collection                                                      | 8-9                |
| Participants                 | 6      | (a) Give the eligibility criteria, and the sources and methods of selection of participants. Describe methods of follow-up                                                           | 8                  |
|                              |        | (b) For matched studies, give matching criteria and number of exposed and unexposed                                                                                                  | NA                 |
| Variables                    | 7      | Clearly define all outcomes, exposures, predictors, potential confounders, and effect modifiers. Give diagnostic criteria, if applicable                                             | 9-11               |
| Data sources/<br>measurement | 8*     | For each variable of interest, give sources of data and details of methods of assessment (measurement). Describe comparability of assessment methods if there is more than one group | 9                  |
| Bias                         | 9      | Describe any efforts to address potential sources of bias                                                                                                                            | 17                 |
| Study size                   | 10     | Explain how the study size was arrived at                                                                                                                                            | 8                  |
| Quantitative variables       | 11     | Explain how quantitative variables were handled in the analyses. If applicable, describe which groupings were chosen and why                                                         | 12                 |
| Statistical methods          | 12     | (a) Describe all statistical methods, including those used to control for confounding                                                                                                | 12                 |
|                              |        | (b) Describe any methods used to examine subgroups and interactions                                                                                                                  | NA                 |
|                              |        | (c) Explain how missing data were addressed                                                                                                                                          | NA                 |
|                              |        | (d) If applicable, explain how loss to follow-up was addressed                                                                                                                       | NA                 |
|                              |        | (e) Describe any sensitivity analyses                                                                                                                                                | NA                 |
| <b>Results</b>               |        |                                                                                                                                                                                      |                    |

|                          |     |                                                                                                                                                                                                              |           |
|--------------------------|-----|--------------------------------------------------------------------------------------------------------------------------------------------------------------------------------------------------------------|-----------|
| Participants             | 13* | (a) Report numbers of individuals at each stage of study—eg numbers potentially eligible, examined for eligibility, confirmed eligible, included in the study, completing follow-up, and analysed            | 8         |
|                          |     | (b) Give reasons for non-participation at each stage                                                                                                                                                         | NA        |
|                          |     | (c) Consider use of a flow diagram                                                                                                                                                                           | NA        |
| Descriptive data         | 14* | (a) Give characteristics of study participants (eg demographic, clinical, social) and information on exposures and potential confounders                                                                     | 13        |
|                          |     | (b) Indicate number of participants with missing data for each variable of interest                                                                                                                          | NA        |
|                          |     | (c) Summarise follow-up time (eg, average and total amount)                                                                                                                                                  | 8         |
| Outcome data             | 15* | Report numbers of outcome events or summary measures over time                                                                                                                                               | NA        |
| Main results             | 16  | (a) Give unadjusted estimates and, if applicable, confounder-adjusted estimates and their precision (eg, 95% confidence interval). Make clear which confounders were adjusted for and why they were included | 11, 13-14 |
|                          |     | (b) Report category boundaries when continuous variables were categorized                                                                                                                                    | NA        |
|                          |     | (c) If relevant, consider translating estimates of relative risk into absolute risk for a meaningful time period                                                                                             | NA        |
| Other analyses           | 17  | Report other analyses done—eg analyses of subgroups and interactions, and sensitivity analyses                                                                                                               | NA        |
| <b>Discussion</b>        |     |                                                                                                                                                                                                              |           |
| Key results              | 18  | Summarise key results with reference to study objectives                                                                                                                                                     | 14        |
| <b>Limitations</b>       |     |                                                                                                                                                                                                              |           |
| Interpretation           | 20  | Give a cautious overall interpretation of results considering objectives, limitations, multiplicity of analyses, results from similar studies, and other relevant evidence                                   | 17        |
| Generalisability         | 21  | Discuss the generalisability (external validity) of the study results                                                                                                                                        | 17        |
| <b>Other information</b> |     |                                                                                                                                                                                                              |           |
| Funding                  | 22  | Give the source of funding and the role of the funders for the present study and, if applicable, for the original study on which the present article is based                                                | 20        |

\*Give information separately for cases and controls in case-control studies and, if applicable, for exposed and unexposed groups in cohort and cross-sectional studies.

**Note:** An Explanation and Elaboration article discusses each checklist item and gives methodological background and published examples of transparent reporting. The STROBE checklist is best used in conjunction with this article (freely available on the Web sites of PLoS Medicine at <http://www.plosmedicine.org/>, Annals of Internal Medicine at <http://www.annals.org/>, and Epidemiology at <http://www.epidem.com/>). Information on the STROBE Initiative is available at [www.strobe-statement.org](http://www.strobe-statement.org).



# BMJ Open

## **Incidence and risk factors of depressive symptoms in four years of follow-up among mid-aged and elderly community-dwelling Chinese adults: Findings from the China health and Retirement Longitudinal Study**

|                                 |                                                                                                                                                                                                                                                                                                                                                                                                                                                                                                                                                                                                                                                                           |
|---------------------------------|---------------------------------------------------------------------------------------------------------------------------------------------------------------------------------------------------------------------------------------------------------------------------------------------------------------------------------------------------------------------------------------------------------------------------------------------------------------------------------------------------------------------------------------------------------------------------------------------------------------------------------------------------------------------------|
| Journal:                        | <i>BMJ Open</i>                                                                                                                                                                                                                                                                                                                                                                                                                                                                                                                                                                                                                                                           |
| Manuscript ID                   | bmjopen-2019-029529.R3                                                                                                                                                                                                                                                                                                                                                                                                                                                                                                                                                                                                                                                    |
| Article Type:                   | Research                                                                                                                                                                                                                                                                                                                                                                                                                                                                                                                                                                                                                                                                  |
| Date Submitted by the Author:   | 06-Jul-2019                                                                                                                                                                                                                                                                                                                                                                                                                                                                                                                                                                                                                                                               |
| Complete List of Authors:       | Wen, Yue; West China Hospital, Sichuan University, Department of Gastrointestinal Surgery<br>Liu, Chunjuan; West China Hospital, Sichuan University, Department of Gastrointestinal Surgery<br>Liao, Jing; West China Hospital, Sichuan University, Department of Gastrointestinal Surgery<br>Yin, Yiqiong; West China Hospital, Sichuan University, Department of Gastrointestinal Surgery<br>Wu, Dongmei; University of Electronic Science and Technology of China, The Clinical Hospital of Chengdu Brain Science Institute, MOE Key Lab for Neuroinformation; The Fourth People's Hospital of Chengdu & Chengdu Mental Health Center, Psychiatric Research Laboratory |
| <b>Primary Subject Heading</b>: | Mental health                                                                                                                                                                                                                                                                                                                                                                                                                                                                                                                                                                                                                                                             |
| Secondary Subject Heading:      | Epidemiology                                                                                                                                                                                                                                                                                                                                                                                                                                                                                                                                                                                                                                                              |
| Keywords:                       | depressive symptoms, incidence, mid-aged and older adults, China                                                                                                                                                                                                                                                                                                                                                                                                                                                                                                                                                                                                          |
|                                 |                                                                                                                                                                                                                                                                                                                                                                                                                                                                                                                                                                                                                                                                           |

SCHOLARONE™  
Manuscripts

1  
2  
3 **Incidence and risk factors of depressive symptoms in four years of follow-up among mid-**  
4 **aged and elderly community-dwelling Chinese adults: Findings from the China Health and**  
5  
6 **Retirement Longitudinal Study**  
7  
8

9  
10 Yue Wen, Chunjuan Liu, Jing Liao, Yiqiong Yin\*, Dongmei Wu\*

11  
12 Correspondence should be made to:

13  
14 Dongmei Wu, PhD, RN

15  
16 Department of Nursing, The Clinical Hospital of Chengdu Brain Science Institute, MOE Key

17  
18 Lab for Neuroinformation, University of Electronic Science and Technology of China

19  
20 Huli West 1st Lane, Chengdu, Sichuan Province, China, 610036.

21  
22 Tel: 86-28-69515754

23  
24 E-mail: [wudongmei\\_2001@163.com](mailto:wudongmei_2001@163.com)

25  
26 Yiqiong Yin, BN, RN

27  
28 Chief Superintendent Nurse, Department of Gastrointestinal Surgery, West China Hospital,

29  
30 Sichuan University

31  
32 37 Guoxue Xiang Street, Chengdu, Sichuan Province, China, 610041.

33  
34 Tel: 86-28-85422877

35  
36 E-mail: [yiqiong489@163.com](mailto:yiqiong489@163.com)

37  
38 \*: Yiqiong Yin and Dongmei Wu were co-corresponding authors for this manuscript.

39  
40 The full names, institutions, city, and country of all other co-authors:

41  
42 Yue Wen, BN, RN

43  
44 Supervisor Nurse, Department of Gastrointestinal Surgery, West China Hospital, Sichuan

45  
46 University

47  
48 37 Guoxue Xiang Street, Chengdu, China, 610041. E-mail: [wenyue19820327@163.com](mailto:wenyue19820327@163.com)

1  
2  
3 Chunjuan Liu, BN, RN

4  
5 Supervisor Nurse, Department of Gastrointestinal Surgery, West China Hospital, Sichuan  
6  
7 University

8  
9  
10 37 Guoxue Xiang Street, Chengdu, China, 610041. E-mail: [liuchunjuan2002@163.com](mailto:liuchunjuan2002@163.com)

11  
12 Jing Liao, MSN, RN

13  
14 Senior Nurse, Department of Gastrointestinal Surgery, West China Hospital, Sichuan University

15  
16 37 Guoxue Xiang Street, Chengdu, China, 610041. E-mail: [m15982277765@163.com](mailto:m15982277765@163.com)

17  
18 Yiqiong Yin, BN, RN

19  
20 Chief Superintendent Nurse, Department of Gastrointestinal Surgery, West China Hospital,  
21  
22 Sichuan University

23  
24 37 Guoxue Xiang Street, Chengdu, China, 610041. E-mail: [yiqiong489@163.com](mailto:yiqiong489@163.com)

25  
26 Dongmei Wu, PhD, RN

27  
28 Assistant Professor, Department of Nursing, The Clinical Hospital of Chengdu Brain Science

29  
30 Institute, MOE Key Lab for Neuroinformation, University of Electronic Science and Technology  
31  
32 of China

33  
34 Huli West 1st Lane, Chengdu, China, 610036. Tel: 86-28-69515754. E-mail:

35  
36  
37  
38  
39  
40 [wudongmei\\_2001@163.com](mailto:wudongmei_2001@163.com)

41  
42 Word count: 7493

## Abstract

**Objectives.** The purpose of this study was to examine the incidence of depressive symptoms, and determine if baseline risk factors conferred a risk for incident depressive symptoms over time in a nationally representative sample of mid-aged and elderly Chinese population.

**Design.** This study was a secondary analysis of a prospective cohort from a nationally representative sample.

**Setting.** Community samples in 28 provinces of China were recruited from the baseline survey of the China Health and Retirement Longitudinal Study. A four-stage, stratified, cluster probability sampling strategy was used, which included 10,257 households with members aged 45 years or older and their spouse.

**Participants.** A total of 11,533 participants free of depressive symptoms at baseline were identified, and 10,288 were re-examined in either the first and/or the second follow-up surveys. The current analyses were conducted among the 10,288 participants.

**Primary and secondary outcome measures.** Depressive symptoms were measured by the Center for Epidemiological Studies Depression Scale short form.

**Results.** The findings showed that the incidence of depressive symptoms in a 4-year follow-up was as high as 22.3%. The incidence was much higher in rural areas (25.7%) and in women (27.9%). Furthermore, participants with an hour longer of sleeping had a 10% lower risk of developing depressive symptoms. Compared to individuals who perceived their health status as poor, those who perceived their health status as excellent had 62% lower risk of developing depressive symptoms. In addition, diabetes (OR=1.19, p=.04) and chronic kidney disease (OR=1.32, p=.02) at baseline increased the risk of depressive symptoms. However, baseline body mass index was not associated with the onset of depressive symptoms in this population.

1  
2  
3 **Conclusions.** This study highlight the importance of developing an appropriate screening test to  
4 identify depressive symptoms for those who are vulnerable and ensure these individuals can  
5 receive early interventions for depressive symptoms.  
6  
7  
8  
9

10 **Key words:** depressive symptoms, incidence, mid-aged and older adults, China  
11  
12  
13  
14  
15  
16  
17  
18  
19  
20  
21  
22  
23  
24  
25  
26  
27  
28  
29  
30  
31  
32  
33  
34  
35  
36  
37  
38  
39  
40  
41  
42  
43  
44  
45  
46  
47  
48  
49  
50  
51  
52  
53  
54  
55  
56  
57  
58  
59  
60

For peer review only

### Strengths and limitations of this study

- Since the sample was representative of community-dwelling mid-aged and older Chinese adults, the study results can be generalized to mid-aged and older Chinese adults.
- Depressive symptoms were based on self-reports instead of clinically diagnosis. Therefore, information bias may be present. However, with longitudinal design, information bias in the current study was very likely to be non-differential.
- This study was a prospective analysis of baseline risk factors with depressive symptoms at follow-up, and no causal associations between these predictors and depressive symptoms can be drawn from the analysis.

## Introduction

Depression has been recognized as a leading cause of disability and a major contributor to disease burdens globally<sup>1</sup>. An estimated 322 million adults had depression in 2015 worldwide, with nearly half of these people living in the South-East Asia and Western Pacific regions<sup>2</sup>. In China, about 4.2% adult population was estimated to be depressed, and the prevalence of depression reached a peak in older adulthood<sup>2</sup>. With fast economic growth, mid-aged adults are exposed to a high-stress lifestyle, which is thought to contribute significantly to an increase in mental health disorders in susceptible people<sup>1</sup>. Older adults, on the other hand, face noteworthy challenges to their life, including loss of independence, loss of social support due to the death of a spouse or weakened family connectedness (traditionally referred to as ‘filial piety’), financial difficulties, and medical vulnerability<sup>3</sup>. Late-life depressive symptoms increase risk for significant impairment in social function<sup>3</sup>, dementia<sup>4</sup>, declined quality of life<sup>5</sup>, and suicide<sup>6</sup>. They further complicate the prognosis of concurrent medical problems by increasing physical disability and decreasing motivation and adherence to prescribed medications and/or exercise or rehabilitation programs<sup>7,8</sup>.

Although depression has come to be regarded as the common cold of psychosocial functioning in Western culture, mental disorders are still viewed as degrading not only to the patient, but also to the entire family in Chinese culture<sup>9,10</sup>. In addition, although effective interventions have been developed to alleviate symptoms of depression, depressive symptoms are often overlooked among the elderly, since most of them mistakenly consider these symptoms to be part of the normal ageing process<sup>11</sup>. Therefore, older adults may not actively seek medical treatment and leave their depressive symptoms undiagnosed or untreated. As persons aged 45 or older will increase from 32% to 51% of the total population from 2010 to 2040 in China<sup>12</sup>,

1  
2  
3 reliable and up-to-date estimates of the proportion of this population affected by depressive  
4 symptoms are a key ingredient of effective health policy, planning, and evaluation.  
5  
6

7  
8 Recently, a number of population-based studies have estimated prevalence of depressive  
9 symptoms among mid-aged and older Chinese adults<sup>3 11 13 14</sup>. Given that all these studies were  
10 cross-sectional, the incidence of depressive symptoms among mid-aged and older Chinese adults  
11 was not clear. Furthermore, despite a myriad of studies that examined a number of health  
12 conditions associated with an increased risk of mid- and late-life depressive symptoms, including  
13 chronic diseases, overweight/obesity, sleep duration, and self-perceived health status<sup>3 14-17</sup>, the  
14 prospective relationships between these health conditions and depressive symptoms have not  
15 been well understood in this population. Such prospective relationships may provide further  
16 evidence on how baseline conditions may be predictive of depressive symptoms in the follow-up  
17 than cross-sectional analysis, especially given that these health conditions are expected to be a  
18 great challenge to an increasing aging population, and can often co-occur with depressive  
19 symptoms which may make these conditions worse<sup>3</sup>. A better understanding of these  
20 associations may also provide information that is useful in identifying patients who are  
21 vulnerable to mid-life or late-life depressive symptoms, and proactively assessing and treating  
22 modifiable risk factors during primary health care service.  
23  
24  
25  
26  
27  
28  
29  
30  
31  
32  
33  
34  
35  
36  
37  
38  
39  
40  
41

42 Therefore, the purpose of this study was to examine the incidence of depressive  
43 symptoms among mid-aged and older adults in China, and determine if baseline sleep duration,  
44 body weight, self-perceived health status, and chronic conditions conferred a risk for incident  
45 depressive symptoms over time, using baseline and four years of follow-up data from the China  
46 Health and Retirement Longitudinal Study (CHARLS).  
47  
48  
49  
50  
51  
52

### 53 **Methods**



## Study Design

This study was a secondary analysis of prospective data from the CHARLS. The CHARLS is a nationwide, community-engaged, population-based epidemiological study of Chinese adults aged 45 years or older. The purpose of the CHARLS was to obtain detailed information regarding the dynamics of retirement and how it interacts with health, health insurance, and economic well-being. The CHARLS collects detailed information on a wide range of domains, including demographics, health status, physical measures, employment history, pension insurance, retirement, income, expenditures and assets<sup>18</sup>. The current study used data from baseline, the first, and the second follow-up surveys.

## Participants

The CHARLS national baseline survey was conducted in 28 provinces (Tibet, Ningxia, and Hainan were not included) across the country from May 2011 to March 2012. It was a survey of 10,257 households with members aged 45 years or older and their spouse, for a total of about 17,708 individuals. A four-stage, stratified, cluster probability sampling strategy was used to select eligible participants<sup>18</sup>. Details of the sampling procedure are published elsewhere<sup>19</sup>. In brief, in the first stage, all counties were grouped by gross domestic product and by urban or rural regions. In the second stage, counties were stratified and sampled using probabilities proportional to size (PPS). Three rural villages and urban neighborhoods were randomly selected as primary sampling units (PSUs) using PPS in each county. In the third stage, all buildings in each PSU were recognized on Google Earth. A sample of 24 households was randomly selected among all households in each PSU. In the final stage, a short screening form was employed to ensure study eligibility in selected households and members of 45 years of age or above were

1  
2  
3 invited to enroll into the study. The response rate for the survey was over 80% (94% in rural  
4  
5 areas and 69% in urban areas) <sup>18</sup>.  
6

7  
8 The baseline cohort of the CHARLS participants was followed up every two years with  
9  
10 the same survey questionnaires and biomedical measures <sup>18</sup>. The first follow-up survey of the  
11  
12 CHARLS was fielded between July 2013 and January 2014. Subjects in this study used the same  
13  
14 inclusion and exclusion criteria as the original study. A total of 11,533 participants free of  
15  
16 depressive symptoms at baseline were identified, of whom 9,329 participated in the first follow-  
17  
18 up survey in 2013-2014, 9,157 were examined in the second follow-up survey in 2015-2016, and  
19  
20 10,288 were followed in either the first or the second follow-up surveys. The current analyses  
21  
22 were conducted among the 10,288 participants.  
23  
24  
25

## 26 **Patient and Public Involvement**

27  
28 Participants with abnormal findings, including depressive symptoms were suggested to  
29  
30 visit a physician for further clinical evaluation. In the current study, we used de-identified data  
31  
32 from the CHARLS with no direct involvement of or interaction with participants in the design,  
33  
34 recruitment or conduct of the original cohort study.  
35  
36  
37

## 38 **Variables, Definitions, and Measures**

39  
40 **Depressive symptoms.** The Center for Epidemiological Studies Depression Scale (CES-  
41  
42 D) short form was used to measure depressive symptoms <sup>20</sup>. The CES-D short form consists of  
43  
44 ten items, and each item is rated on a four-point Likert scale with answers ranging from 0 (rarely  
45  
46 or none of the time) to 3 (most or all of the time) with the total possible summary score of 0 to  
47  
48 30. The time frame for the CES-D short form refers to the week prior to interview. Item 5  
49  
50 (“feeling hopeful about the future”) and 8 (“feeling happy”) are reversely scored before analysis.  
51  
52  
53  
54  
55  
56  
57  
58  
59  
60

1  
2  
3 Higher scores corresponds to higher levels of depressive symptoms, and a score of 12 or higher  
4  
5 has been used as the cut-off point for depressive symptoms <sup>21</sup>.  
6

7  
8 The CES-D short form has been validated among a subsample of 742 CHARLS  
9  
10 participants aged 60 years and older, showing adequate psychometric properties <sup>21</sup>.  
11  
12 Confirmatory factor analysis showed that the two-factor model had the best fit. Depressive affect  
13  
14 and somatic retardation were loaded as the first factor, and positive affect was loaded as the  
15  
16 second factor. The two-factor structure varied across both genders in multi-group analysis ( $\chi^2=$   
17  
18 144.13,  $p<0.001$ ).  $R^2$  coefficient was used to measure the reliability of each item, and some of  
19  
20 them differed between both gender groups. For example, depressive affect and somatic  
21  
22 retardation accounted for 37% and 64% of the variance in the depression indicator (“bothered”)  
23  
24 for the males and females, respectively <sup>21</sup>.  
25  
26  
27

28 **Measure of health conditions associated with depressive symptoms.** These factors  
29  
30 included chronic conditions, overweight/obesity, sleep duration, and self-perceived health status.  
31  
32 Information on chronic conditions was primarily based on self-reports except hypertension and  
33  
34 diabetes. Participants were asked if they had been diagnosed with any of the following health  
35  
36 conditions: arthritis, dyslipidemia, cancer (excluding minor skin cancers), liver diseases (except  
37  
38 for fatty liver, tumors or cancer), cardiovascular diseases (heart attack, coronary heart disease,  
39  
40 angina, congestive heart failure, or other heart problems), stroke, kidney disease (except for  
41  
42 cancer or tumor), stomach or other gastrointestinal diseases (except for tumor or cancer),  
43  
44 memory-related diseases, and asthma. Participants answered “yes” to these questions were  
45  
46 defined as having these doctor-diagnosed conditions.  
47  
48  
49  
50

51 Hypertension was defined based on the most current guidelines from the American Heart  
52  
53 Association, which have lowered the threshold of hypertension cut-off points to 130/80 mmHg <sup>22</sup>.  
54  
55

1  
2  
3 A systolic blood pressure measurement of 130 mmHg and higher, or a diastolic measurement of  
4  
5 80 mmHg and higher, or 130/80 mmHg and higher, or taking antihypertensive medications  
6  
7 including modern western medicine, traditional Chinese medicine, or using other treatment for  
8  
9 hypertension was considered as having hypertension<sup>22</sup>. Blood pressure was measured three  
10  
11 times (approximately 45 seconds apart) for each participant on the left arm in sitting position,  
12  
13 using an electronic blood pressure monitor (Omron™ HEM-7112)<sup>23</sup>.  
14  
15

16  
17 The diagnosis of diabetes was based on the current guidelines from the American  
18  
19 Diabetes Association (2018). Readings of 126 mg/dL or higher for fasting blood glucose  $\geq$ 126  
20  
21 mg/dL, or readings of 200 mg/dL or higher for random blood glucose, or readings of 6.5% or  
22  
23 higher for glycated hemoglobin, or use of insulin, or taking oral hypoglycemic medications  
24  
25 including traditional Chinese medicine, modern western medicine, or other diabetes treatment  
26  
27 was considered as having diabetes<sup>24</sup>.  
28  
29

30  
31 Weight was measured to the nearest 0.1 kg using a digital scale (Omron™ HN-286,  
32  
33 Yangzhou, China) on an even, uncarpeted surface, with participants removing heavy outer  
34  
35 clothing. Height was measured without shoes to the nearest 0.1 cm using a stadiometer  
36  
37 (Seca™213, Hangzhou, China). Body mass index (BMI, weight in kilograms divided by height  
38  
39 in meters squared) was calculated from the participants' weight and height.  
40  
41

42  
43 Self-perceived health status is a powerful indicator of the health status of elderly people  
44  
45<sup>25</sup>. It was measured based on self-reports to the following question, “Would you rate health  
46  
47 as...”, with five response options provided: excellent, very good, good, fair, and poor.  
48

49  
50 Sleep duration in hours was collected using a question, “During the past month, how  
51  
52 many hours of actual sleep did you get at night (average hours for one night)? (This may be  
53  
54 shorter than the number of hours you spend in bed.)”  
55

1  
2  
3 **Covariates.** Factors that could confound the main association were identified a priori  
4 from current literature. Covariates included age, gender<sup>3</sup>, education<sup>26</sup>, and marital status<sup>3 27</sup>.  
5  
6 Consistent with a prior CHARLS publications<sup>28 29</sup>, education was categorized as illiterate or no  
7 formal education, some primary school but can read and write, primary school including home  
8 schooling, and middle school or above. Marital status was grouped as married versus not married.  
9  
10  
11  
12  
13

### 14 **Ethical Considerations**

15  
16  
17 The CHARLS was approved by the Peking University Ethical Review Committee. The  
18 current study is a secondary analysis of the de-identified CHARLS public data. The Ethics  
19 Review Committee granted the current study exemption from review.  
20  
21  
22  
23

### 24 **Statistical Analysis**

25  
26 **Incidence of depressive symptoms.** The incidence of depressive symptoms was  
27 analyzed taking into account the complex survey design and nonresponse rate in both estimates  
28 and the corresponding standard errors (SEs). Participants were categorized into 5-year age  
29 groups. SAS PROC SURVEYFREQ procedure was used to obtain the overall and gender  
30 specific incidence of depressive symptoms among all participants and by the 5-year age groups.  
31  
32 In addition, overall and gender-specific incidence of depressive symptoms was estimated by  
33 rural and urban areas. We estimated the incidence of four outcomes of depressive symptoms:  
34 having depressive symptoms in the first follow-up survey (2013-2014); having depressive  
35 symptoms in the second follow-up survey (2015-2016); ever having depressive symptoms in the  
36 first or the second follow-up survey; and consistently having depressive symptoms in both  
37 follow-up surveys.  
38  
39  
40  
41  
42  
43  
44  
45  
46  
47  
48  
49  
50

51 **Prospective analysis.** Baseline characteristics of the participants were summarized as  
52 frequency and percentage for categorical variables and mean and standard deviation or median  
53  
54  
55

1  
2  
3 and interquartile range for continuous variables. Associations of baseline health behaviors,  
4 including chronic conditions, overweight/obesity, sleep duration, and self-perceived health status,  
5 with the incidence of ever having depressive symptoms in 4 years of follow-up were evaluated  
6 by a multivariate logistic regression model, while controlling for all covariates as mentioned  
7 above. Odds ratios (ORs) and the corresponding 95% confidence intervals (CIs) were reported.  
8 The SAS 9.4 (SAS Institute Inc., Cary, North Carolina) was used to perform the analyses. All the  
9 p values were two-sided, and  $p < 0.05$  was considered significant.

## 19 Results

### 21 Sample Characteristics

22 A total of 10,288 participants aged 45 years or older were included in the estimate of  
23 depressive symptoms incidence. As shown in Table 1, the average age of all participants was  
24 58.5 years and roughly half participants (49.3%) were women. Most of the participants (73.3%)  
25 lived in rural areas and 60.6% participants had education of primary school or above. The  
26 majority of participants (90.0%) were married or living with a partner at the time of data  
27 collection. About a third of the participants (31.5%) were current smokers and 17.9% were  
28 current regular drinkers. Participants had an average BMI of 23.7 kg/m<sup>2</sup>. The mean duration of  
29 sleep per night was 6.7 hours, and less than 20% of participants perceived their health as very  
30 good or excellent. The mean CES-D short form score was 5.1 at baseline.

### 44 Incidence of Depressive Symptoms

45 As shown in Table 2 and in Figure 1, the incidence of ever having depressive symptoms  
46 in 4 years was 22.3% (95% CI: 21.3%-23.3%). The incidence was much higher in rural areas  
47 than that in urban areas (25.7% vs. 15.3%,  $p < .0001$ ). Women had higher incidence of depressive  
48 symptoms than men (27.9% vs. 16.7%,  $p < .0001$ ). There is no clear pattern of the incidence of  
49  
50  
51  
52  
53  
54  
55

depressive symptoms over age groups (Figure 1). The incidence was highest among the 65-70 years of age group and lowest among the 45-50 years of age group.

### **Baseline Risk Factors and Incident Depressive Symptoms**

As shown in Table 3, in the fully adjusted multivariable logistic regression model, sleeping duration and self-perceived health status were both inversely associated with the risk of depressive symptoms. Specifically, participants with an hour longer of sleeping had a 10% (95% CI: 7%-13%,  $p < .0001$ ) lower risk of developing depressive symptoms in 4 years of follow up. Compared to individuals who perceived their health status as poor, those who perceived their health status as fair, good, very good, and excellent had 42% (95% CI: 39%-52%), 47% (95% CI: 36%-57%), 64% (95% CI: 54%-72%), and 62% (95% CI: 43%-74%) lower risk of developing depressive symptoms, respectively. In addition, three chronic conditions, diabetes (OR=1.19, 95% CI: 1.00-1.42,  $p = .04$ ), chronic kidney disease (OR=1.32, 95% CI: 1.04-1.67,  $p = .02$ ), chronic digestive disorders (OR=1.15, 95% CI: 1.01-1.31,  $p = .04$ ), and arthritis (OR=1.43, 95% CI: 1.28-1.61,  $p < .0001$ ) were associated with higher risk of depressive symptoms. However, baseline BMI was not associated with the onset of depressive symptoms in this population (OR=0.99, 95% CI: 0.97-1.01). Chronic lung disease ( $p = .001$ ), chronic liver disease ( $p = .004$ ), and asthma ( $p = .02$ ) were positively associated with incidence of depressive disorder in the raw analysis, but became non-significant in the fully adjusted model (all  $p > .05$ ).

### **Discussion**

Through analysis to data of a nationally representative sample of mid-aged and older Chinese adults, we found that the incidence of depressive symptoms in a 4-year follow-up was as high as 22.3%. Large disparities in the incidence of depressive symptoms were observed between rural and urban areas and between men and women. Furthermore, longer sleeping

1  
2  
3 duration and better self-perceived health status were both associated with lower risk of  
4  
5 depressive symptoms. In addition, diabetes and chronic kidney disease at baseline increased the  
6  
7 risk of depressive symptoms. However, baseline BMI was not associated with depressive  
8  
9 symptoms in this population.  
10  
11

12 Our study found that in 4 years of follow-up, as high as 22.3% of the mid-aged and older  
13  
14 Chinese adults developed depressive symptoms. Using the same database, a recent study  
15  
16 reported that the prevalence of depressive symptoms at CHARLS baseline survey was up to 26.2%  
17  
18 <sup>13</sup>. Collectively, these findings revealed that depressive symptoms were a major public health  
19  
20 challenge in China, and intervention programs should be developed to reduce the burden of  
21  
22 depressive symptoms. Furthermore, large disparities were also observed between rural and urban  
23  
24 residents and between men and women. In particular, women and residents living in rural areas  
25  
26 were at a higher risk of developing depressive symptoms. The high incidence rate is not only  
27  
28 relevant to middle-aged and older Chinese adults, it also has implications for younger  
29  
30 generations of the Chinese. Many depressive symptoms cases remained undiagnosed, and even  
31  
32 among those who were aware of the condition, very few sought treatments due to cultural stigma  
33  
34 <sup>9 10</sup>. Middle-aged and elderly grandparents are the primary caregivers of infants, toddlers, and  
35  
36 young children in rural China. Depressed caregivers were more likely to show negative parenting  
37  
38 interactions (e.g., limited facial and behavioral affect) with their children, and these interactions  
39  
40 were directly relevant for children's development <sup>30 31</sup>. A strong negative correlation has been  
41  
42 reported between the levels of depression of grandmothers and the levels of developmental  
43  
44 outcomes of the grandchildren in their care, including cognitive, language, social-emotional, and  
45  
46 motor functions <sup>32 33</sup>. Taken together, changes in social policies and intervention programs  
47  
48  
49  
50  
51  
52  
53  
54  
55  
56  
57  
58  
59  
60



1  
2  
3 should be developed to address timely diagnosis and treatment of depression for these people,  
4  
5 which will help improve young children's developmental outcomes in rural China.  
6

7  
8 Individuals with longer sleep duration had lower risk of depressive symptoms. This  
9  
10 finding is in line with previous studies<sup>34 35</sup>. Sleep disorders are often the presenting and core  
11  
12 symptoms of depression<sup>36</sup>. However, treatment of depression did not resolve sleep symptoms,  
13  
14 which may confer a greater risk for depression recurrence and relapse<sup>36</sup>. Therefore, sleep  
15  
16 deprivation should be at least considered as an early indicator of depressive symptoms.  
17

18  
19 Individuals with sleep deprivation should be aware of their high risk of depressive symptoms and  
20  
21 manage to improve the length of their sleeping.  
22

23  
24 Better self-perceived health status also reduced the risk of depressive symptoms in the  
25  
26 current study. The finding is consistent with studies among other populations<sup>37 38</sup>. Self-perceived  
27  
28 health is a powerful indicator of the overall health status of elderly people<sup>25</sup>. Many factors,  
29  
30 including sociodemographic characteristics, chronic disease, functional status, social  
31  
32 relationships, neighborhood environment, and nutrition pattern, were all important determinants  
33  
34 of self-perceived health<sup>25</sup>. These factors are also associated with depressive symptoms. The  
35  
36 current study adjusted most of the factors, except for functional status, social relationship, and  
37  
38 nutrition pattern, which were not available in the CHARLS database. However, poorer self-  
39  
40 perceived health status was still significantly associated with higher risk of depressive symptoms.  
41  
42 Future studies additionally controlling for those factors will help to evaluate the contribution of  
43  
44 those factors on the associations of self-perceived health status with depressive symptoms.  
45  
46 Furthermore, such study may also help delineate whether self-perceived health status may  
47  
48 represent other factors that may lead to depressive symptoms. Finally, individuals with  
49  
50 depressive disorders were more likely to report poor self-perceived health<sup>39 40</sup>. Therefore, there  
51  
52  
53  
54  
55

1  
2  
3 might be a bidirectional association between depressive symptoms and self-perceived health.  
4  
5 Future studies examining the bi-directional relationship are warranted.  
6

7  
8 Among 12 chronic conditions, baseline chronic kidney disease increased the risk of  
9  
10 depressive symptoms at follow-up. Although the underlying mechanisms have not been well  
11  
12 understood, some authors suggested that the psychosocial and biologic changes in dialysis may  
13  
14 explain this relationship<sup>41</sup>. In addition to chronic kidney disease, baseline diabetes also  
15  
16 conferred a higher risk of symptoms of depression over time in this study. Similar results were  
17  
18 reported in a meta-analysis of 11 studies, which found that people with diabetes at baseline had a  
19  
20 24% higher risk of developing depression at follow-up compared to those without diabetes<sup>42</sup>. In  
21  
22 addition, high prevalence of depression among people with diabetes and/or chronic kidney  
23  
24 disease has also been observed in cross-sectional studies<sup>43-45</sup>. In concordance with these findings,  
25  
26 this study added further evidence that compared to other chronic conditions at baseline, baseline  
27  
28 chronic disease and diabetes were more likely to be associated with depressive symptoms over  
29  
30 time in a population of mid-aged and older Chinese population.  
31  
32  
33  
34

35 Overweight/obesity is well established to interfere with mental health, with depressive  
36  
37 symptoms being more common among overweight/obese individuals than their normal-weight  
38  
39 counterparts, especially in overweight/obese women<sup>46,47</sup>. A meta-analysis of longitudinal studies  
40  
41 further confirmed this relationship, in which excess weight at baseline increased a higher risk for  
42  
43 incident depression at follow-up<sup>48</sup>. In contrast to these findings from Western and European  
44  
45 countries, using data from a prospective survey of a large, representative sample of mid-aged and  
46  
47 elderly community-dwelling residents in Mainland China, we did not find a relationship between  
48  
49 baseline BMI and subsequent depressive symptoms over time. These inconsistent findings may  
50  
51 suggest that because participants in the current study were predominantly low in BMI at baseline  
52  
53  
54  
55  
56  
57  
58  
59  
60

1  
2  
3 (mean BMI was 23.7 kg/m<sup>2</sup>), their likelihood of experiencing depressive symptoms may have  
4  
5 been lower compared to those participants reported in Luppino et al<sup>48</sup>. However, these are  
6  
7 preliminary findings that need to be further investigated in future prospective studies in this  
8  
9 population.  
10

11  
12 The study has several important strengths. First, to the best of our knowledge, this is the  
13  
14 first study that examined the incidence of depressive symptoms in a nationally representative  
15  
16 population in China. Previous studies have focused on the estimation of depressive symptoms  
17  
18 prevalence<sup>49 50</sup> or investigated the incidence of depressive symptoms in a regional sample<sup>51</sup>.  
19  
20 Second, since the sample was representative of community-dwelling mid-aged and older Chinese  
21  
22 adults, the results can be generalized to mid-aged and older Chinese adults. Third, a Chinese  
23  
24 specific cut-off point of the CES-D short form score for depressive symptoms has been used, and  
25  
26 the cut-off point was validated among middle-aged and older Chinese adults<sup>21</sup>. Therefore, our  
27  
28 study provided more reliable estimate of the incidence of depressive symptoms. Finally, strict  
29  
30 quality control measures, including GPS matching, data checking, recording and checking  
31  
32 interviews, and calling back participants, were implemented at each stage of the study to ensure  
33  
34 data quality and reliability.  
35  
36  
37  
38  
39

40  
41 There were also some limitations in this study that should be acknowledged. First,  
42  
43 depressive symptoms were based on self-reports instead of clinically diagnosis. Therefore,  
44  
45 information bias may be present. However, with longitudinal design, information bias in the  
46  
47 current study was very likely to be non-differential. Since non-differential misclassification  
48  
49 generally bias the association estimates towards the null, our study findings were more robust.  
50  
51 Second, nighttime sleep duration was also measured based on self-reports. The use of self-  
52  
53 reported measures in the CHARLS surveys may have biased study results, since participants may  
54  
55  
56  
57  
58  
59  
60

1  
2  
3 consistently under- or overestimate their nighttime sleep duration <sup>52</sup>. Objective or direct  
4  
5 measures of sleep duration should be used to increase precision and accuracy of self-report  
6  
7 assessment. Finally, this study was a prospective analysis of baseline risk factors with depressive  
8  
9 symptoms at follow-up, and no causal associations between these predictors and depressive  
10  
11 symptoms can be drawn from the analysis.  
12  
13

14  
15 The findings of the current study have important implications for clinical practice. Health  
16  
17 care professionals are especially encouraged to address the needs for better mental health in  
18  
19 elderly population <sup>53</sup>. In view of the high incidence of depressive symptoms (22.3%) among mid-  
20  
21 aged and elderly Chinese, the findings of this study highlight the importance of developing an  
22  
23 appropriate screening test to identify depressive symptoms for those who are vulnerable and  
24  
25 ensure these individuals can receive early interventions for depressive symptoms. The screening  
26  
27 test should include items such as areas of living (rural or urban areas), gender, age groups,  
28  
29 nighttime sleep duration, self-perceived health status, and certain chronic conditions, especially  
30  
31 chronic kidney disease and diabetes. In addition, intervention strategies that address short  
32  
33 nighttime sleep duration may be used to alleviate depressive symptoms and improve mental  
34  
35 health in this population. Intervention programs should also be prioritized to target at specific  
36  
37 populations, such as women and residents living in rural areas, as these populations were at a  
38  
39 higher risk of developing depressive symptoms. Finally, new patients with chronic kidney  
40  
41 disease and diabetes should be screened for depression using the CES-D short form at initial visit.  
42  
43  
44  
45  
46  
47 Persons with depressive symptoms (a score of 12 or higher) should then be assessed by a  
48  
49 clinician using the structured clinical interview for Diagnostic and Statistical Manual of Mental  
50  
51 Disorders, Fifth Edition. Potential participants with serious depressive symptoms should be  
52  
53 referred immediately to a mental health professional. Individuals with these two conditions are  
54  
55  
56  
57  
58  
59  
60

1  
2  
3 particularly vulnerable to the deleterious effects of affective symptoms, since symptoms of  
4  
5 depression is a known risk factor for noncompliance with medical treatment and adverse health  
6  
7 outcomes<sup>54 55</sup>.  
8  
9

### 10 **Conclusions**

11  
12 To conclude, our study found a high incidence of depressive symptoms in 4 years of  
13  
14 follow-up among a nationally representative mid-aged and older Chinese population. In addition,  
15  
16 great disparities in the incidence of depressive symptoms were observed between individuals  
17  
18 lived in rural and urban areas and between men and women. Furthermore, we identified that  
19  
20 worse self-perceived health, shorter duration of sleeping, diabetes and chronic kidney disease at  
21  
22 baseline increased the risk for depressive symptoms. These findings supported the importance of  
23  
24 baseline status to longitudinal changes in depressive symptoms. Thus, interventions for  
25  
26 vulnerable mid-aged and older adults should focus on addressing short nighttime sleep duration.  
27  
28 These findings also help identify individuals at higher risk for depressive symptoms, such as  
29  
30 those with chronic kidney disease and diabetes, or women and residents living in rural areas, so  
31  
32 that early interventions can be implemented to prevent depressive symptoms.  
33  
34  
35  
36

### 37 **Figure Legend**

38  
39  
40 Figure 1. The Incidence of Depressive Symptoms in 4 Years of Follow-up among  
41  
42 Participants of the CHARLS  
43  
44  
45  
46  
47  
48  
49  
50  
51  
52  
53  
54  
55  
56

### **Contributorship Statement**

All authors contribute to the conception and design of this study. YW, YY, and DW were responsible for the design, analysis, drafting and revision of this manuscript. CL and JL were responsible for interpretation of data and preparation of the manuscript.

### **Competing Interests Statement**

None declared.

### **Funding Statement**

This work was supported by the Sichuan Science and Technology Program grant number 2018JY0306 to Dr. Dongmei Wu. The CHARLS is funded by Peking University, the National Natural Science Foundation of China, the Behavioral and Social Research Division of the National Institute on Aging, and the World Bank.

### **Acknowledgments**

The authors would gratefully acknowledge the assistance Dr. Tingting Liu, an assistant professor at University of Arkansas Eleanor Mann School of Nursing for editing the manuscript.

### **Patient Consent for Publication**

Not required.

### **Data Sharing Statement**

The study used a public data from the CHARLS that were obtained from the CHARLS home page at <http://charls.pku.edu.cn/en>.

## References

1. Qin X, Wang S, Hsieh C. The prevalence of depression and depressive symptoms among adults in China: Estimation based on a National Household Survey. *China Economic Review* 2016 doi: 10.1016/j.chieco.2016.04.001
2. World Health Organization. Depression and other common mental disorders: Global health estimates. Geneva, Swiss: World Health Organization 2017.
3. Lei X, Sun X, Strauss J, et al. Depressive symptoms and SES among the mid-aged and elderly in China: Evidence from the China Health and Retirement Longitudinal Study national baseline. *Social Science & Medicine* 2014;120:224-32. doi: 10.1016/j.socscimed.2014.09.028 [published Online First: 2014/09/28]
4. Diniz BS, Butters MA, Albert SM, et al. Late-life depression and risk of vascular dementia and Alzheimer's disease: Systematic review and meta-analysis of community-based cohort studies. *The British journal of psychiatry : the journal of mental science* 2013;202:329-35. doi: 10.1192/bjp.bp.112.118307 [published Online First: 2013/05/03]
5. Sivertsen H, Bjørkløf GH, Engedal K, et al. Depression and quality of life in older persons: A review. *Dementia and geriatric cognitive disorders* 2015;40:311-39. doi: 10.1159/000437299
6. Wang CW, Chan CL, Yip PS. Suicide rates in China from 2002 to 2011: An update. *Social psychiatry and psychiatric epidemiology* 2014;49:929-41. doi: 10.1007/s00127-013-0789-5 [published Online First: 2013/11/19]
7. Holzapfel N, Lowe B, Wild B, et al. Self-care and depression in patients with chronic heart failure. *Heart & Lung* 2009;38:392-97. doi: 10.1016/j.hrtlng.2008.11.001 [published Online First: 2009/09/17]

- 1  
2  
3 8. Gonzalez JS, Safren SA, Delahanty LM, et al. Symptoms of depression prospectively predict  
4  
5 poorer self-care in patients with type 2 diabetes. *Diabetetic Medicine* 2008;25:1102-07.  
6  
7 doi: 10.1111/j.1464-5491.2008.02535.x [published Online First: 2009/02/03]  
8  
9
- 10 9. Zeng B, Sun W, Gary RA, et al. Towards a conceptual model of diabetes self-management  
11  
12 among Chinese immigrants in the United States. *International journal of environmental*  
13  
14 *research and public health* 2014;11:6727-42. doi: 10.3390/ijerph110706727 [published  
15  
16 Online First: 2014/07/01]  
17  
18
- 19 10. He P, Hu Y, Li C, et al. Predictors of depressive symptoms among mid-aged and older men  
20  
21 with diabetes in China. *Research and theory for nursing practice* 2019;33(1):6-22. doi:  
22  
23 10.1891/1541-6577.33.1.6 [published Online First: 2019/02/24]  
24  
25
- 26 11. Xu Y, Yang J, Gao J, et al. Decomposing socioeconomic inequalities in depressive  
27  
28 symptoms among the elderly in China. *BMC public health* 2016;16:1214. doi:  
29  
30 10.1186/s12889-016-3876-1 [published Online First: 2016/12/03]  
31  
32
- 33 12. United Nations Department of Economic and Social Affairs/Population Division. World  
34  
35 population prospects: The 2012 revision, volume II: Demographic profiles. New York, NY:  
36  
37 United Nations 2012.  
38  
39
- 40 13. Li C, Miles T, Shen L, et al. Early-life exposure to severe famine and subsequent risk of  
41  
42 depressive symptoms in late adulthood: The China Health and Retirement Longitudinal  
43  
44 Study. *British Journal of Psychiatry* 2018;213:579-86. doi: 10.1192/bjp.2018.116  
45  
46 [published Online First: 2018/08/31]  
47  
48
- 49 14. Yu J, Li J, Cuijpers P, et al. Prevalence and correlates of depressive symptoms in Chinese  
50  
51 older adults: A population-based study. *International journal of geriatric psychiatry*  
52  
53 2012;27:305-12. doi: 10.1002/gps.2721 [published Online First: 2011/05/04]  
54  
55  
56  
57  
58  
59



- 1  
2  
3 15. Alvaro PK, Roberts RM, Harris JK. A systematic review assessing bidirectionality between  
4  
5 sleep disturbances, anxiety, and depression. *Sleep* 2013;36:1059-68. doi:  
6  
7 10.5665/sleep.2810 [published Online First: 2013/07/03]  
8  
9
- 10 16. Wilson-Genderson M, Heid AR, Pruchno R. Onset of multiple chronic conditions and  
11  
12 depressive symptoms: A life events perspective. *Innovation in Aging* 2017;1:igx022-  
13  
14 igx22. doi: 10.1093/geroni/igx022  
15  
16
- 17 17. Qian J, Li N, Ren X. Obesity and depressive symptoms among Chinese people aged 45 and  
18  
19 over. *Scientific reports* 2017;7:45637. doi: 10.1038/srep45637  
20  
21
- 22 18. Zhao Y, Hu Y, Smith JP, et al. Cohort profile: The China Health and Retirement  
23  
24 Longitudinal Study (CHARLS). *International journal of epidemiology* 2014;43:61-68.  
25  
26 doi: 10.1093/ije/dys203 [published Online First: 2012/12/18]  
27  
28
- 29 19. Li C, Liu T, Sun W, et al. Prevalence and risk factors of arthritis in a middle-aged and older  
30  
31 Chinese population: The China Health and Retirement Longitudinal Study.  
32  
33 *Rheumatology (Oxford, England)* 2015;54:697-706. doi: 10.1093/rheumatology/keu391  
34  
35 [published Online First: 2014/10/08]  
36  
37
- 38 20. Andresen EM, Malmgren JA, Carter WB, et al. Screening for depression in well older adults:  
39  
40 Evaluation of a short form of the CES-D (Center for Epidemiologic Studies Depression  
41  
42 Scale). *American journal of preventive medicine* 1994;10(2):77-84. [published Online  
43  
44 First: 1994/03/01]  
45  
46
- 47 21. Chen H, Mui AC. Factorial validity of the Center for Epidemiologic Studies Depression  
48  
49 Scale short form in older population in China. *International psychogeriatrics / IPA*  
50  
51 2014;26:49-57. doi: 10.1017/s1041610213001701 [published Online First: 2013/10/16]  
52  
53  
54  
55  
56  
57  
58  
59  
60

- 1  
2  
3 22. Whelton PK, Carey RM, Aronow WS, et al. 2017  
4  
5 ACC/AHA/AAPA/ABC/ACPM/AGS/APhA/ASH/ASPC/NMA/PCNA Guideline for the  
6  
7 Prevention, Detection, Evaluation, and Management of High Blood Pressure in Adults:  
8  
9 Executive Summary: A Report of the American College of Cardiology/American Heart  
10  
11 Association Task Force on Clinical Practice Guidelines. *Circulation* 2018;138(17):e426-  
12  
13 e83. doi: 10.1161/cir.0000000000000597 [published Online First: 2018/10/26]  
14  
15  
16  
17 23. Zhao Y, Crimmins E, Hu P, et al. China Health And Retirement Longitudinal Study: 2011-  
18  
19 2012 national baseline blood data users' guide. Beijing, China: China Center for  
20  
21 Economic Research, Peking Universtiy 2014.  
22  
23  
24 24. American Diabetes Association. 2. Classification and diagnosis of diabetes: Standards of  
25  
26 medical care in diabetes-2018. *Diabetes care* 2018;41:S13-S27. doi: 10.2337/dc18-S002  
27  
28 [published Online First: 2017/12/10]  
29  
30  
31 25. Machón M, Vergara I, Dorronsoro M, et al. Self-perceived health in functionally independent  
32  
33 older people: Associated factors. *BMC geriatrics* 2016;16:66. doi: 10.1186/s12877-016-  
34  
35 0239-9 [published Online First: 2016/03/11]  
36  
37  
38 26. Bjelland I, Krokstad S, Mykletun A, et al. Does a higher educational level protect against  
39  
40 anxiety and depression? The HUNT study. *Social science & medicine (1982)*  
41  
42 2008;66:1334-45. doi: 10.1016/j.socscimed.2007.12.019 [published Online First:  
43  
44 2008/02/01]  
45  
46  
47 27. Cheng HG, Chen S, McBride O, et al. Prospective relationship of depressive symptoms,  
48  
49 drinking, and tobacco smoking among middle-aged and elderly community-dwelling  
50  
51 adults: Results from the China Health and Retirement Longitudinal Study (CHARLS).  
52  
53  
54  
55  
56  
57  
58  
59  
60

- 1  
2  
3 *Journal of affective disorders* 2016;195:136-43. doi: 10.1016/j.jad.2016.02.023  
4  
5 [published Online First: 2016/02/20]  
6  
7  
8 28. Zuo M, Gan C, Liu T, et al. Physical predictors of cognitive function in individuals with  
9  
10 hypertension: Evidence from the CHARLS baseline survey. *Western journal of nursing*  
11  
12 *research* 2019;41(4):592-614. doi: 10.1177/0193945918770794 [published Online First:  
13  
14 2018/05/11]  
15  
16  
17 29. Zhang M, Liu T, Li C, et al. Physical performance and cognitive functioning among  
18  
19 individuals with diabetes: Findings from the China Health and Retirement Longitudinal  
20  
21 Study Baseline Survey. *Journal of advanced nursing* 2019;75(5):1029-41. doi:  
22  
23 10.1111/jan.13901 [published Online First: 2018/11/07]  
24  
25  
26 30. Lovejoy MC, Graczyk PA, O'Hare E, et al. Maternal depression and parenting behavior: A  
27  
28 meta-analytic review. *Clinical psychology review* 2000;20(5):561-92. [published Online  
29  
30 First: 2000/06/22]  
31  
32  
33 31. Pelaez M, Field T, Pickens JN, et al. Disengaged and authoritarian parenting behavior of  
34  
35 depressed mothers with their toddlers. *Infant behavior & development* 2008;31(1):145-8.  
36  
37 doi: 10.1016/j.infbeh.2007.06.002 [published Online First: 2007/07/27]  
38  
39  
40 32. Yue A, Gao J, Yang M, et al. Caregiver depression and early child development: A mixed-  
41  
42 methods study from rural China. *Frontiers in psychology* 2018;9:2500. doi:  
43  
44 10.3389/fpsyg.2018.02500 [published Online First: 2019/01/09]  
45  
46  
47 33. Zhang S, Dang R, Yang N, et al. Effect of caregiver's mental health on early childhood  
48  
49 development across different rural communities in China. *International journal of*  
50  
51 *environmental research and public health* 2018;15(11) doi: 10.3390/ijerph15112341  
52  
53 [published Online First: 2018/10/27]  
54  
55  
56  
57  
58  
59  
60

- 1  
2  
3 34. Sun Y, Shi L, Bao Y, et al. The bidirectional relationship between sleep duration and  
4  
5 depression in community-dwelling middle-aged and elderly individuals: Evidence from a  
6  
7 longitudinal study. *Sleep medicine* 2018;52:221-29. doi: 10.1016/j.sleep.2018.03.011  
8  
9 [published Online First: 2018/06/05]  
10  
11  
12 35. Li Y, Wu Y, Zhai L, et al. Longitudinal association of sleep duration with depressive  
13  
14 symptoms among middle-aged and older Chinese. *Scientific reports* 2017;7:11794. doi:  
15  
16 10.1038/s41598-017-12182-0 [published Online First: 2017/09/20]  
17  
18  
19 36. Nutt D, Wilson S, Paterson L. Sleep disorders as core symptoms of depression. *Dialogues in*  
20  
21 *clinical neuroscience* 2008;10(3):329-36. [published Online First: 2008/11/05]  
22  
23  
24 37. Cole MG, Dendukuri N. Risk factors for depression among elderly community subjects: A  
25  
26 systematic review and meta-analysis. *American Journal of Psychiatry* 2003;160:1147-56.  
27  
28 doi: 10.1176/appi.ajp.160.6.1147 [published Online First: 2003/06/05]  
29  
30  
31 38. Conti CL, Barbosa WM, Simão JBP, et al. Pesticide exposure, tobacco use, poor self-  
32  
33 perceived health and presence of chronic disease are determinants of depressive  
34  
35 symptoms among coffee growers from Southeast Brazil. *Psychiatry Res* 2018;260:187-92.  
36  
37 doi: 10.1016/j.psychres.2017.11.063 [published Online First: 2017/12/01]  
38  
39  
40 39. Leão T, Perelman J. Depression symptoms as mediators of inequalities in self-reported health:  
41  
42 the case of Southern European elderly. *J Public Health (Oxf)* 2018;40(4):756-63. doi:  
43  
44 10.1093/pubmed/idx173  
45  
46  
47 40. Alarcão V, Madeira T, Peixoto-Plácido C, et al. Gender differences in psychosocial  
48  
49 determinants of self-perceived health among Portuguese older adults in nursing homes.  
50  
51 *Aging Ment Health* 2018:1-8. doi: 10.1080/13607863.2018.1471583 [published Online  
52  
53 First: 2018/05/23]  
54  
55  
56  
57  
58  
59  
60

- 1  
2  
3 41. Sonikian M, Metaxaki P, Papavasileiou D, et al. Effects of interleukin-6 on depression risk in  
4  
5 dialysis patients. *American journal of nephrology* 2010;31:303-08. doi:  
6  
7 10.1159/000285110 [published Online First: 2010/02/18]  
8  
9  
10 42. Nouwen A, Winkley K, Twisk J, et al. Type 2 diabetes mellitus as a risk factor for the onset  
11  
12 of depression: A systematic review and meta-analysis. *Diabetologia* 2010;53:2480-86.  
13  
14 doi: 10.1007/s00125-010-1874-x [published Online First: 2010/08/17]  
15  
16  
17 43. Anderson RJ, Freedland KE, Clouse RE, et al. The prevalence of comorbid depression in  
18  
19 adults with diabetes: A meta-analysis. *Diabetes care* 2001;24(6):1069-78. [published  
20  
21 Online First: 2001/05/26]  
22  
23  
24 44. Palmer S, Vecchio M, Craig JC, et al. Prevalence of depression in chronic kidney disease:  
25  
26 Systematic review and meta-analysis of observational studies. *Kidney international*  
27  
28 2013;84:179-91. doi: 10.1038/ki.2013.77 [published Online First: 2013/03/15]  
29  
30  
31 45. Roy T, Lloyd CE. Epidemiology of depression and diabetes: A systematic review. *Journal of*  
32  
33 *affective disorders* 2012;142 Suppl:S8-S21. doi: 10.1016/s0165-0327(12)70004-6  
34  
35 [published Online First: 2012/10/25]  
36  
37  
38 46. Atlantis E, Baker M. Obesity effects on depression: Systematic review of epidemiological  
39  
40 studies. *International journal of obesity (2005)* 2008;32:881-91. doi: 10.1038/ijo.2008.54  
41  
42 [published Online First: 2008/04/17]  
43  
44  
45 47. de Wit L, Luppino F, van Straten A, et al. Depression and obesity: A meta-analysis of  
46  
47 community-based studies. *Psychiatry research* 2010;178:230-35. doi:  
48  
49 10.1016/j.psychres.2009.04.015 [published Online First: 2010/05/14]  
50  
51  
52 48. Luppino FS, de Wit LM, Bouvy PF, et al. Overweight, obesity, and depression: A systematic  
53  
54 review and meta-analysis of longitudinal studies. *Archives of general psychiatry*  
55  
56

- 1  
2  
3 2010;67:220-29. doi: 10.1001/archgenpsychiatry.2010.2 [published Online First:  
4  
5 2010/03/03]  
6  
7  
8 49. Lee S, Tsang A, Huang YQ, et al. The epidemiology of depression in metropolitan China.  
9  
10 *Psychol Med* 2009;39(5):735-47. doi: 10.1017/S0033291708004091 [published Online  
11  
12 First: 2008/08/20]  
13  
14  
15 50. Charlson FJ, Baxter AJ, Cheng HG, et al. The burden of mental, neurological, and substance  
16  
17 use disorders in China and India: a systematic analysis of community representative  
18  
19 epidemiological studies. *Lancet* 2016 doi: 10.1016/S0140-6736(16)30590-6  
20  
21  
22 51. Wang T, Xiao S, Yang C, et al. Prevalence and incidence of depression disorder and  
23  
24 cognitive impairment in the elderly in Shanghai, China. *Alzheimer's & Dementia*  
25  
26 2015;11(7):P832-P33.  
27  
28  
29 52. Li J, Cacchione PZ, Hodgson N, et al. Afternoon napping and cognition in Chinese older  
30  
31 adults: Findings from the China Health and Retirement Longitudinal Study Baseline  
32  
33 Assessment. *Journal of American Geriatrics Society* 2017;65:373-80. doi:  
34  
35 10.1111/jgs.14368 [published Online First: 2016/12/21]  
36  
37  
38 53. Avasthi A, Grover S. Clinical practice guidelines for management of depression in elderly.  
39  
40 *Indian journal of psychiatry* 2018;60:S341-S62. doi: 10.4103/0019-5545.224474  
41  
42 [published Online First: 2018/03/15]  
43  
44  
45 54. Zhang Y, Ting RZ, Yang W, et al. Depression in Chinese patients with type 2 diabetes:  
46  
47 Associations with hyperglycemia, hypoglycemia, and poor treatment adherence. *Journal*  
48  
49 *of diabetes* 2015;7:800-8008. doi: 10.1111/1753-0407.12238 [published Online First:  
50  
51 2014/10/29]  
52  
53  
54  
55  
56  
57  
58  
59  
60

- 1  
2  
3 55. Fischer MJ, Kimmel PL, Greene T, et al. Elevated depressive affect is associated with  
4  
5 adverse cardiovascular outcomes among African Americans with chronic kidney disease.  
6  
7 *Kidney international* 2011;80:670-78. doi: 10.1038/ki.2011.153 [published Online First:  
8  
9 2011/06/03]  
10  
11  
12  
13  
14  
15  
16  
17  
18  
19  
20  
21  
22  
23  
24  
25  
26  
27  
28  
29  
30  
31  
32  
33  
34  
35  
36  
37  
38  
39  
40  
41  
42  
43  
44  
45  
46  
47  
48  
49  
50  
51  
52  
53  
54  
55  
56  
57  
58  
59  
60

For peer review only

## Tables

**Table 1. Baseline characteristics of the CHARLS participants free of depressive symptoms**

| Variable                                       | Distribution   |
|------------------------------------------------|----------------|
| N                                              | 10,288         |
| age, years, mean (SD)                          | 58.5 (9.8)     |
| Male, n (%)                                    | 5845 (50.7%)   |
| Living in rural areas, n (%)                   | 8,440 (73.3%)  |
| Education, n (%)                               |                |
| <i>No formal education or illiterate</i>       | 2,736 (23.7%)  |
| <i>Some primary school</i>                     | 1,804 (15.7%)  |
| <i>Finished primary school</i>                 | 2,590 (22.5%)  |
| <i>Junior high school or above</i>             | 4,394 (38.1%)  |
| Currently married, n (%)                       | 10,375 (90.0%) |
| Smoking status, n (%)                          |                |
| <i>Current smoker</i>                          | 3,629 (31.5%)  |
| <i>Former smoker</i>                           | 1,034 (9.0%)   |
| <i>Never smoking</i>                           | 6,868 (60.0%)  |
| Drinking status, n (%)                         |                |
| <i>Regular drinkers</i>                        | 1,951 (17.9%)  |
| <i>Occasional drinkers</i>                     | 476 (4.4%)     |
| <i>Former drinkers</i>                         | 646 (5.9%)     |
| <i>Never drinking</i>                          | 7,833 (71.8%)  |
| Weight, kg, mean (SD)                          | 60 (11.8)      |
| Height, m, mean (SD)                           | 1.6 (0.1)      |
| Body mass index, kg/m <sup>2</sup> , mean (SD) | 23.7 (4)       |
| Sleeping duration, hours, mean (SD)            | 6.7 (1.7)      |
| CES-D short form score                         | 5.1 (3.3)      |
| Self-perceived health status, n (%)            |                |
| <i>Excellent</i>                               | 483 (4.2%)     |
| <i>Very good</i>                               | 1,744 (15.1%)  |
| <i>Good</i>                                    | 4,136 (35.9%)  |
| <i>Fair</i>                                    | 3,977 (34.5%)  |
| <i>Poor</i>                                    | 1,187 (10.3%)  |
| Chronic conditions, n (%)                      |                |
| <i>Hypertension</i>                            | 4,045 (40.3%)  |
| <i>Dyslipidemia</i>                            | 1,016 (9.0%)   |
| <i>Diabetes</i>                                | 1,210 (15.0%)  |
| <i>Cancer</i>                                  | 97 (0.8%)      |
| <i>Liver disease</i>                           | 387 (3.4%)     |
| <i>Heart disease</i>                           | 1,162 (10.1%)  |
| <i>Stroke</i>                                  | 188 (1.6%)     |
| <i>Kidney disease</i>                          | 563 (4.9%)     |



|                                 |               |
|---------------------------------|---------------|
| <i>Gastrointestinal disease</i> | 2,180 (18.9%) |
| <i>Dementia</i>                 | 105 (0.9%)    |
| <i>Arthritis</i>                | 3,221 (28.0%) |
| <i>Asthma</i>                   | 312 (2.7%)    |

*Note.* CES-D=Center for Epidemiologic Study of Depression short form; SD=standard deviation.

For peer review only

**Table 2. Incidence of depressive symptoms among the CHARLS participants**

|         | Ever having depressive Symptoms | Depressive symptoms in both visits 2 & 3 | Depressive symptoms in 2 years | Depressive symptoms in 4 years |
|---------|---------------------------------|------------------------------------------|--------------------------------|--------------------------------|
| Overall | 22.3 (21.3-23.3)                | 4.4 (4.0-4.9)                            | 13.2 (12.5-14.1)               | 16.8 (15.9-17.7)               |
| Rural   | 25.7 (24.6-26.8)                | 5.3 (4.8-5.8)                            | 15.3 (14.3-16.2)               | 18.8 (17.8-19.8)               |
| Urban   | 15.3 (13.4-17.2)                | 2.6 (1.9-3.3)                            | 9.0 (7.4-10.6)                 | 12.2 (10.4-14.1)               |
| Men     | 16.7 (15.5-17.9)                | 3.0 (2.5-3.5)                            | 9.9 (9.0-10.9)                 | 12.2 (11.1-13.2)               |
| Women   | 27.9 (26.4-29.4)                | 5.8 (5.1-6.6)                            | 16.6 (15.3-17.9)               | 21.5 (20.1-22.9)               |

For peer review only

**Table 3. Raw and multi-variables adjusted associations with the incidence of depressive symptoms in 4 years of follow-up.**

| Variables                                         | Multi-Variate Adjusted |                  | Raw Association  |                  |
|---------------------------------------------------|------------------------|------------------|------------------|------------------|
|                                                   | OR (95% CI)            | P                | OR (95% CI)      | P                |
| Age, per year older                               | 0.99 (0.98-0.99)       | <b>0.001</b>     | 0.99 (0.99-1.00) | 0.59             |
| Male vs. Female                                   | 0.60 (0.51-0.71)       | <b>&lt;.0001</b> | 0.51 (0.46-0.56) | <b>&lt;.0001</b> |
| Education level                                   |                        |                  |                  |                  |
| <i>No formal education or illiterate</i>          | ref.                   | <b>&lt;.0001</b> | ref.             | <b>&lt;.0001</b> |
| <i>Some primary school</i>                        | 1.06 (0.90-1.25)       |                  | 0.93 (0.80-1.08) |                  |
| <i>Finished primary school</i>                    | 0.83 (0.71-0.97)       |                  | 0.67 (0.57-0.77) |                  |
| <i>Junior high school or above</i>                | 0.71 (0.61-0.84)       |                  | 0.48 (0.42-0.55) |                  |
| Rural vs. Urban                                   | 1.61 (1.38-1.88)       | <b>&lt;.0001</b> | 1.72 (1.50-1.96) | <b>&lt;.0001</b> |
| Not married vs Married                            | 1.25 (1.04-1.51)       | <b>0.02</b>      | 1.28 (1.08-1.51) | <b>0.004</b>     |
| Smoking status                                    |                        |                  |                  |                  |
| <i>Non-smokers</i>                                | ref.                   |                  | ref.             |                  |
| <i>Current smokers</i>                            | 1.02 (0.86-1.20)       | <b>0.03</b>      | 0.51 (0.41-0.62) | <b>&lt;.0001</b> |
| <i>Former smokers</i>                             | 0.75 (0.59-0.96)       |                  | 0.68 (0.60-0.76) |                  |
| Drinking status                                   |                        |                  |                  |                  |
| <i>Never drinkers</i>                             | Ref.                   |                  | ref.             |                  |
| <i>Former drinkers</i>                            | 1.02 (0.80-1.30)       | 0.15             | 0.84 (0.67-1.04) | <b>&lt;.0001</b> |
| <i>Occasional drinkers</i>                        | 0.79 (0.59-1.06)       |                  | 0.59 (0.45-0.78) |                  |
| <i>Regular drinkers</i>                           | 0.85 (0.71-1.01)       |                  | 0.59 (0.51-0.68) |                  |
| Body mass index, per 1 kg/m <sup>2</sup> increase | 0.99 (0.98-1.01)       | 0.20             | 0.99 (0.98-1.00) | 0.14             |
| Self-perceived health status                      |                        |                  |                  |                  |
| <i>Excellent</i>                                  | 0.36 (0.25-0.52)       | <b>&lt;.0001</b> | 0.28 (0.20-0.39) | <b>&lt;.0001</b> |
| <i>Very good</i>                                  | 0.36 (0.29-0.45)       |                  | 0.28 (0.23-0.35) |                  |
| <i>Good</i>                                       | 0.53 (0.44-0.63)       |                  | 0.45 (0.38-0.53) |                  |
| <i>Fair</i>                                       | 0.61 (0.52-0.73)       |                  | 0.56 (0.48-0.66) |                  |
| <i>Poor</i>                                       | ref.                   |                  | ref.             |                  |
| Sleep duration, per hour longer                   | 0.89 (0.87-0.92)       | <b>&lt;.0001</b> | 0.88 (0.85-0.90) | <b>&lt;.0001</b> |
| Hypertension (Y vs. N)                            | 1.07 (0.95-1.21)       | 0.25             | 1.07 (0.96-1.18) | 0.22             |
| Dyslipidemia (Y vs. N)                            | 0.85 (0.69-1.04)       | 0.12             | 0.91 (0.76-1.09) | 0.29             |
| Diabetes (Y vs. N)                                | 1.19 (1.00-1.42)       | <b>0.04</b>      | 1.11 (0.95-2.30) | 0.19             |
| Cancer (Y vs. N)                                  | 0.92 (0.48-1.77)       | 0.80             | 1.17 (0.65-2.12) | 0.61             |
| Chronic Lung Disease (Y vs. N)                    | 1.18 (0.97-1.44)       | 0.10             | 1.33 (1.12-1.58) | <b>0.001</b>     |
| Chronic Liver Disease (Y vs. N)                   | 0.90 (0.67-1.22)       | 0.51             | 1.04 (0.79-1.37) | 0.81             |
| Heart Disease (Y vs. N)                           | 1.06 (0.88-1.28)       | 0.54             | 1.27 (1.08-1.49) | <b>0.004</b>     |
| Stroke (Y vs. N)                                  | 0.88 (0.56-1.39)       | 0.59             | 1.12 (0.75-1.66) | 0.58             |
| Chronic Kidney Disease (Y vs. N)                  | 1.32 (1.04-1.67)       | <b>0.02</b>      | 1.45 (1.16-1.80) | <b>0.001</b>     |
| Chronic Digestive Disorders (Y vs. N)             | 1.15 (1.01-1.31)       | <b>0.04</b>      | 1.43 (1.26-1.61) | <b>&lt;.0001</b> |
| Psychological Disorders (Y vs. N)                 | 1.00 (0.53-1.89)       | 0.99             | 1.44 (0.81-2.56) | 0.22             |
| Dementia (Y vs. N)                                | 1.31 (0.72-2.38)       | 0.37             | 1.15 (0.67-1.97) | 0.62             |
| Arthritis (Y vs. N)                               | 1.43 (1.28-1.61)       | <b>&lt;.0001</b> | 1.72 (1.54-1.91) | <b>&lt;.0001</b> |
| Asthma (Y vs. N)                                  | 1.25 (0.90-1.75)       | 0.19             | 1.43 (1.06-1.91) | <b>0.02</b>      |

1  
2  
3  
4  
5  
6  
7  
8  
9  
10  
11  
12  
13  
14  
15  
16  
17  
18  
19  
20  
21  
22  
23  
24  
25  
26  
27  
28  
29  
30  
31  
32  
33  
34  
35  
36  
37  
38  
39  
40  
41  
42  
43  
44  
45  
46  
47  
48  
49  
50  
51  
52  
53  
54  
55  
56  
57  
58  
59  
60

Note. CI=confidence interval; OR=odds ratio

For peer review only

1  
2  
3  
4  
5  
6  
7  
8  
9  
10  
11  
12  
13  
14  
15  
16  
17  
18  
19  
20  
21  
22  
23  
24  
25  
26  
27  
28  
29  
30  
31  
32  
33  
34  
35  
36  
37  
38  
39  
40  
41  
42  
43  
44  
45  
46  
47  
48  
49  
50  
51  
52  
53  
54  
55  
56  
57  
58  
59  
60



254x190mm (300 x 300 DPI)

**STROBE 2007 (v4) Statement—Checklist of items that should be included in reports of *cohort studies***

| Section/Topic                | Item # | Recommendation                                                                                                                                                                       | Reported on page # |
|------------------------------|--------|--------------------------------------------------------------------------------------------------------------------------------------------------------------------------------------|--------------------|
| <b>Title and abstract</b>    | 1      | (a) Indicate the study's design with a commonly used term in the title or the abstract                                                                                               | 3                  |
|                              |        | (b) Provide in the abstract an informative and balanced summary of what was done and what was found                                                                                  | 3                  |
| <b>Introduction</b>          |        |                                                                                                                                                                                      |                    |
| Background/rationale         | 2      | Explain the scientific background and rationale for the investigation being reported                                                                                                 | 6-7                |
| Objectives                   | 3      | State specific objectives, including any prespecified hypotheses                                                                                                                     | 7                  |
| <b>Methods</b>               |        |                                                                                                                                                                                      |                    |
| Study design                 | 4      | Present key elements of study design early in the paper                                                                                                                              | 8                  |
| Setting                      | 5      | Describe the setting, locations, and relevant dates, including periods of recruitment, exposure, follow-up, and data collection                                                      | 8-9                |
| Participants                 | 6      | (a) Give the eligibility criteria, and the sources and methods of selection of participants. Describe methods of follow-up                                                           | 8                  |
|                              |        | (b) For matched studies, give matching criteria and number of exposed and unexposed                                                                                                  | NA                 |
| Variables                    | 7      | Clearly define all outcomes, exposures, predictors, potential confounders, and effect modifiers. Give diagnostic criteria, if applicable                                             | 9-11               |
| Data sources/<br>measurement | 8*     | For each variable of interest, give sources of data and details of methods of assessment (measurement). Describe comparability of assessment methods if there is more than one group | 9                  |
| Bias                         | 9      | Describe any efforts to address potential sources of bias                                                                                                                            | 17                 |
| Study size                   | 10     | Explain how the study size was arrived at                                                                                                                                            | 8                  |
| Quantitative variables       | 11     | Explain how quantitative variables were handled in the analyses. If applicable, describe which groupings were chosen and why                                                         | 12                 |
| Statistical methods          | 12     | (a) Describe all statistical methods, including those used to control for confounding                                                                                                | 12                 |
|                              |        | (b) Describe any methods used to examine subgroups and interactions                                                                                                                  | NA                 |
|                              |        | (c) Explain how missing data were addressed                                                                                                                                          | NA                 |
|                              |        | (d) If applicable, explain how loss to follow-up was addressed                                                                                                                       | NA                 |
|                              |        | (e) Describe any sensitivity analyses                                                                                                                                                | NA                 |
| <b>Results</b>               |        |                                                                                                                                                                                      |                    |

|                          |     |                                                                                                                                                                                                              |           |
|--------------------------|-----|--------------------------------------------------------------------------------------------------------------------------------------------------------------------------------------------------------------|-----------|
| Participants             | 13* | (a) Report numbers of individuals at each stage of study—eg numbers potentially eligible, examined for eligibility, confirmed eligible, included in the study, completing follow-up, and analysed            | 8         |
|                          |     | (b) Give reasons for non-participation at each stage                                                                                                                                                         | NA        |
|                          |     | (c) Consider use of a flow diagram                                                                                                                                                                           | NA        |
| Descriptive data         | 14* | (a) Give characteristics of study participants (eg demographic, clinical, social) and information on exposures and potential confounders                                                                     | 13        |
|                          |     | (b) Indicate number of participants with missing data for each variable of interest                                                                                                                          | NA        |
|                          |     | (c) Summarise follow-up time (eg, average and total amount)                                                                                                                                                  | 8         |
| Outcome data             | 15* | Report numbers of outcome events or summary measures over time                                                                                                                                               | NA        |
| Main results             | 16  | (a) Give unadjusted estimates and, if applicable, confounder-adjusted estimates and their precision (eg, 95% confidence interval). Make clear which confounders were adjusted for and why they were included | 11, 13-14 |
|                          |     | (b) Report category boundaries when continuous variables were categorized                                                                                                                                    | NA        |
|                          |     | (c) If relevant, consider translating estimates of relative risk into absolute risk for a meaningful time period                                                                                             | NA        |
| Other analyses           | 17  | Report other analyses done—eg analyses of subgroups and interactions, and sensitivity analyses                                                                                                               | NA        |
| <b>Discussion</b>        |     |                                                                                                                                                                                                              |           |
| Key results              | 18  | Summarise key results with reference to study objectives                                                                                                                                                     | 14        |
| <b>Limitations</b>       |     |                                                                                                                                                                                                              |           |
| Interpretation           | 20  | Give a cautious overall interpretation of results considering objectives, limitations, multiplicity of analyses, results from similar studies, and other relevant evidence                                   | 17        |
| Generalisability         | 21  | Discuss the generalisability (external validity) of the study results                                                                                                                                        | 17        |
| <b>Other information</b> |     |                                                                                                                                                                                                              |           |
| Funding                  | 22  | Give the source of funding and the role of the funders for the present study and, if applicable, for the original study on which the present article is based                                                | 20        |

\*Give information separately for cases and controls in case-control studies and, if applicable, for exposed and unexposed groups in cohort and cross-sectional studies.

**Note:** An Explanation and Elaboration article discusses each checklist item and gives methodological background and published examples of transparent reporting. The STROBE checklist is best used in conjunction with this article (freely available on the Web sites of PLoS Medicine at <http://www.plosmedicine.org/>, Annals of Internal Medicine at <http://www.annals.org/>, and Epidemiology at <http://www.epidem.com/>). Information on the STROBE Initiative is available at [www.strobe-statement.org](http://www.strobe-statement.org).

# BMJ Open

## **Incidence and risk factors of depressive symptoms in four years of follow-up among mid-aged and elderly community-dwelling Chinese adults: Findings from the China health and Retirement Longitudinal Study**

|                                 |                                                                                                                                                                                                                                                                                                                                                                                                                                                                                                                                                                                                                                                                           |
|---------------------------------|---------------------------------------------------------------------------------------------------------------------------------------------------------------------------------------------------------------------------------------------------------------------------------------------------------------------------------------------------------------------------------------------------------------------------------------------------------------------------------------------------------------------------------------------------------------------------------------------------------------------------------------------------------------------------|
| Journal:                        | <i>BMJ Open</i>                                                                                                                                                                                                                                                                                                                                                                                                                                                                                                                                                                                                                                                           |
| Manuscript ID                   | bmjopen-2019-029529.R4                                                                                                                                                                                                                                                                                                                                                                                                                                                                                                                                                                                                                                                    |
| Article Type:                   | Research                                                                                                                                                                                                                                                                                                                                                                                                                                                                                                                                                                                                                                                                  |
| Date Submitted by the Author:   | 18-Jul-2019                                                                                                                                                                                                                                                                                                                                                                                                                                                                                                                                                                                                                                                               |
| Complete List of Authors:       | Wen, Yue; West China Hospital, Sichuan University, Department of Gastrointestinal Surgery<br>Liu, Chunjuan; West China Hospital, Sichuan University, Department of Gastrointestinal Surgery<br>Liao, Jing; West China Hospital, Sichuan University, Department of Gastrointestinal Surgery<br>Yin, Yiqiong; West China Hospital, Sichuan University, Department of Gastrointestinal Surgery<br>Wu, Dongmei; University of Electronic Science and Technology of China, The Clinical Hospital of Chengdu Brain Science Institute, MOE Key Lab for Neuroinformation; The Fourth People's Hospital of Chengdu & Chengdu Mental Health Center, Psychiatric Research Laboratory |
| <b>Primary Subject Heading</b>: | Mental health                                                                                                                                                                                                                                                                                                                                                                                                                                                                                                                                                                                                                                                             |
| Secondary Subject Heading:      | Epidemiology                                                                                                                                                                                                                                                                                                                                                                                                                                                                                                                                                                                                                                                              |
| Keywords:                       | depressive symptoms, incidence, mid-aged and older adults, China                                                                                                                                                                                                                                                                                                                                                                                                                                                                                                                                                                                                          |
|                                 |                                                                                                                                                                                                                                                                                                                                                                                                                                                                                                                                                                                                                                                                           |

SCHOLARONE™  
Manuscripts



1  
2  
3 **Incidence and risk factors of depressive symptoms in four years of follow-up among mid-**  
4 **aged and elderly community-dwelling Chinese adults: Findings from the China Health and**  
5  
6  
7 **Retirement Longitudinal Study**  
8  
9

10 Yue Wen, Chunjuan Liu, Jing Liao, Yiqiong Yin\*, Dongmei Wu\*

11  
12 Correspondence should be made to:

13  
14 Dongmei Wu, PhD, RN

15  
16 Department of Nursing, The Clinical Hospital of Chengdu Brain Science Institute, MOE Key

17  
18 Lab for Neuroinformation, University of Electronic Science and Technology of China

19  
20 Huli West 1st Lane, Chengdu, Sichuan Province, China, 610036.

21  
22 Tel: 86-28-69515754

23  
24 E-mail: [wudongmei\\_2001@163.com](mailto:wudongmei_2001@163.com)

25  
26 Yiqiong Yin, BN, RN

27  
28 Chief Superintendent Nurse, Department of Gastrointestinal Surgery, West China Hospital,

29  
30 Sichuan University

31  
32 37 Guoxue Xiang Street, Chengdu, Sichuan Province, China, 610041.

33  
34 Tel: 86-28-85422877

35  
36 E-mail: [yiqiong489@163.com](mailto:yiqiong489@163.com)

37  
38 \*: Yiqiong Yin and Dongmei Wu were co-corresponding authors for this manuscript.

39  
40 The full names, institutions, city, and country of all other co-authors:

41  
42 Yue Wen, BN, RN

43  
44 Supervisor Nurse, Department of Gastrointestinal Surgery, West China Hospital, Sichuan

45  
46 University

47  
48 37 Guoxue Xiang Street, Chengdu, China, 610041. E-mail: [wenyue19820327@163.com](mailto:wenyue19820327@163.com)

1  
2  
3 Chunjuan Liu, BN, RN  
4

5 Supervisor Nurse, Department of Gastrointestinal Surgery, West China Hospital, Sichuan  
6  
7 University  
8

9  
10 37 Guoxue Xiang Street, Chengdu, China, 610041. E-mail: [liuchunjuan2002@163.com](mailto:liuchunjuan2002@163.com)  
11

12 Jing Liao, MSN, RN  
13

14 Senior Nurse, Department of Gastrointestinal Surgery, West China Hospital, Sichuan University  
15

16 37 Guoxue Xiang Street, Chengdu, China, 610041. E-mail: [m15982277765@163.com](mailto:m15982277765@163.com)  
17

18 Yiqiong Yin, BN, RN  
19

20 Chief Superintendent Nurse, Department of Gastrointestinal Surgery, West China Hospital,  
21  
22 Sichuan University  
23

24 37 Guoxue Xiang Street, Chengdu, China, 610041. E-mail: [yiqiong489@163.com](mailto:yiqiong489@163.com)  
25

26 Dongmei Wu, PhD, RN  
27

28 Assistant Professor, Department of Nursing, The Clinical Hospital of Chengdu Brain Science  
29

30 Institute, MOE Key Lab for Neuroinformation, University of Electronic Science and Technology  
31  
32 of China  
33

34 Huli West 1st Lane, Chengdu, China, 610036. Tel: 86-28-69515754. E-mail:  
35

36  
37  
38  
39 [wudongmei\\_2001@163.com](mailto:wudongmei_2001@163.com)  
40

41  
42 Word count: 7802  
43  
44  
45  
46  
47  
48  
49  
50  
51  
52  
53  
54  
55  
56  
57  
58  
59  
60

## Abstract

**Objectives.** The purpose of this study was to examine the incidence of depressive symptoms, and determine if baseline risk factors conferred a risk for incident depressive symptoms in nationally representative sample of mid-aged and elderly Chinese adults.

**Design.** This study was a secondary analysis of a prospective cohort from a nationally representative sample.

**Setting.** Community samples were recruited from the baseline survey of the China Health and Retirement Longitudinal Study. A four-stage, stratified, cluster probability sampling strategy was used, which included 10,257 households with members aged 45 years or older and their spouse.

**Participants.** A total of 11,533 participants free of depressive symptoms at baseline were identified, and 10,288 were re-examined in either the first and/or the second follow-up surveys. The current analysis was conducted among the 10,288 participants.

**Primary and secondary outcome measures.** Depressive symptoms were measured by the Center for Epidemiological Studies Depression Scale short form.

**Results.** The findings showed that the incidence of depressive symptoms in a 4-year follow-up was as high as 22.3%. The incidence was much higher in rural areas (25.7%) and in women (27.9%). Furthermore, participants with one-hour longer of nighttime sleep had a 10% lower risk of developing depressive symptoms. Compared to individuals who perceived their health status as poor, those who perceived their health status as excellent had a 62% lower risk of developing depressive symptoms. In addition, having diabetes (OR=1.19), chronic kidney disease (OR=1.32), chronic digestive disorders (OR=1.15), and arthritis (OR=1.43) at baseline increased the risk of depressive symptoms. However, baseline body mass index was not associated with the subsequent depressive symptoms in this population.

1  
2  
3 **Conclusions.** This study highlights the importance of developing an appropriate screening test to  
4 identify depressive symptoms for those who are vulnerable and ensure these individuals can  
5 receive early interventions for depressive symptoms.  
6  
7  
8  
9

10 **Key words:** depressive symptoms, incidence, mid-aged and older adults, China  
11  
12  
13  
14  
15  
16  
17  
18  
19  
20  
21  
22  
23  
24  
25  
26  
27  
28  
29  
30  
31  
32  
33  
34  
35  
36  
37  
38  
39  
40  
41  
42  
43  
44  
45  
46  
47  
48  
49  
50  
51  
52  
53  
54  
55  
56  
57  
58  
59  
60

For peer review only

### Strengths and limitations of this study

- Since the sample was representative of community-dwelling mid-aged and older Chinese adults, the study results can be generalized to mid-aged and older Chinese adults.
- Depressive symptoms were based on self-reports instead of clinical diagnosis. Therefore, information bias may be present. However, with a longitudinal design, information bias in the current study was likely to be non-differential.
- This study was a prospective analysis of baseline risk factors of depressive symptoms at follow-up, and no causal associations between these predictors and depressive symptoms can be drawn from the analysis.

## Introduction

Depression has been recognized as a leading cause of disability and a major contributor to disease burdens globally<sup>1</sup>. An estimated 322 million adults had depression in 2015 worldwide, with nearly half of these people living in the South-East Asia and Western Pacific regions<sup>2</sup>. In China, about 4.2% adults was estimated to be depressed, and the prevalence of depression reached a peak in older adulthood<sup>2</sup>. With fast economic growth, mid-aged adults are exposed to a high-stress lifestyle, which is thought to contribute significantly to an increase in mental health disorders in susceptible people<sup>1</sup>. Older adults, on the other hand, face noteworthy challenges to their life, including loss of independence, loss of social support due to the death of a spouse or weakened family connectedness (traditionally referred to as ‘filial piety’), financial difficulties, and medical vulnerability<sup>3</sup>. Late-life depressive symptoms increase risk for significant impairment in social function<sup>3</sup>, dementia<sup>4</sup>, declined quality of life<sup>5</sup>, and suicide<sup>6</sup>. They further complicate the prognosis of concurrent medical problems by increasing physical disability and decreasing motivation and adherence to prescribed medications and/or exercise or rehabilitation programs<sup>7,8</sup>.

Although depression has come to be regarded as the common cold of psychosocial functioning in Western culture, mental disorders are still viewed as degrading not only to the patient, but also to the entire family in Chinese culture<sup>9,10</sup>. In addition, although effective interventions have been developed to alleviate symptoms of depression, depressive symptoms are often overlooked among the elderly, since most of them mistakenly consider these symptoms to be part of the normal aging process<sup>11</sup>. Therefore, older adults may not actively seek medical treatment and leave their depressive symptoms undiagnosed or untreated. As persons aged 45 or older will increase from 32% to 51% of the total population from 2010 to 2040 in China<sup>12</sup>,

1  
2  
3 reliable and up-to-date estimates of the proportion of this population affected by depressive  
4 symptoms are a key ingredient of effective health policy, planning, and evaluations.  
5  
6

7  
8 Recently, a number of population-based studies have estimated the prevalence of  
9  
10 depressive symptoms among mid-aged and older Chinese adults <sup>3 11 13 14</sup>. Given that all these  
11 studies were cross-sectional, the incidence of depressive symptoms among mid-aged and older  
12 Chinese adults was not clear. Furthermore, despite a myriad of studies that examined a number  
13 of health conditions associated with an increased risk of mid- and late-life depressive symptoms,  
14 including chronic diseases, overweight/obesity, sleep duration, and self-perceived health status <sup>3</sup>  
15 <sup>14-17</sup>, the prospective relationships between these health conditions and depressive symptoms  
16 have not been well understood in this population. Such prospective relationships may provide  
17 further evidence on how baseline conditions may be predictive of depressive symptoms in the  
18 follow-up periods than cross-sectional analysis, especially given that these health conditions are  
19 expected to be a great challenge to an increasing aging population, and can often co-occur with  
20 depressive symptoms which may make these conditions even worse <sup>3</sup>. A better understanding of  
21 these associations may also provide information that is useful in identifying patients who are  
22 vulnerable to mid-life or late-life depressive symptoms, and proactively assessing and treating  
23 modifiable risk factors during primary health care service.  
24  
25  
26  
27  
28  
29  
30  
31  
32  
33  
34  
35  
36  
37  
38  
39  
40  
41

42 Therefore, the purpose of this study was to examine the incidence of depressive  
43 symptoms among mid-aged and older adults in China, and determine if baseline sleep duration,  
44 body weight, self-perceived health status, and chronic conditions conferred a risk for incident  
45 depressive symptoms over time, using baseline and four years of follow-up data from the China  
46 Health and Retirement Longitudinal Study (CHARLS).  
47  
48  
49  
50  
51  
52

## 53 **Methods**

## Study Design

This study was a secondary analysis of prospective data from the CHARLS. The CHARLS is a nationwide, community-engaged, population-based epidemiological study of Chinese adults aged 45 years or older. The purpose of the CHARLS was to obtain detailed information regarding the dynamics of retirement and how it interacts with health, health insurance, and economic well-being. The CHARLS collects detailed information on a wide range of domains, including demographics, health status, physical measures, employment history, pension insurance, retirement, income, expenditures and assets<sup>18</sup>. The current study used data from baseline, the first, and the second follow-up surveys.

## Participants

The CHARLS national baseline survey was conducted in 28 provinces (Tibet, Ningxia, and Hainan were not included) across the country from May 2011 to March 2012. It was a survey of 10,257 households with members aged 45 years or older and their spouse, for a total of about 17,708 individuals. A four-stage, stratified, cluster probability sampling strategy was used to select eligible participants<sup>18</sup>. Details of the sampling procedures have been published elsewhere<sup>19</sup>. In brief, in the first stage, all counties were grouped by gross domestic product and by urban or rural regions. In the second stage, counties were stratified and sampled using probabilities proportional to size (PPS). Three rural villages and urban neighborhoods were randomly selected as primary sampling units (PSUs) using PPS in each county. In the third stage, all buildings in each PSU were recognized on satellite imagery of the Google Earth. A sample of 24 households was randomly selected among all households in each PSU. In the final stage, a short screening form was employed to ensure study eligibility in selected households and



1  
2  
3 members of 45 years of age or above were invited to enroll into the study. The response rate for  
4  
5 the survey was over 80% (94% in rural areas and 69% in urban areas) <sup>18</sup>.  
6

7  
8 The baseline cohort of the CHARLS participants was followed up every two years with  
9  
10 the same survey questionnaires and biomedical measures <sup>18</sup>. The first follow-up survey of the  
11  
12 CHARLS was fielded between July 2013 and January 2014. Subjects in this study used the same  
13  
14 inclusion and exclusion criteria as the original study. A total of 11,533 participants free of  
15  
16 depressive symptoms at baseline was identified, of whom 9,329 participated in the first follow-  
17  
18 up survey in 2013-2014, 9,157 were examined in the second follow-up survey in 2015-2016, and  
19  
20 10,288 were followed in either the first or the second follow-up surveys. The current analysis  
21  
22 was conducted among the 10,288 participants.  
23  
24

### 25 26 **Patient and Public Involvement**

27  
28 In the current study, we used de-identified data from the CHARLS with no direct  
29  
30 involvement of or interaction with participants in the design, recruitment or conduct of the  
31  
32 original cohort study.  
33  
34

### 35 36 **Variables, Definitions, and Measures**

37  
38 **Depressive symptoms.** The Center for Epidemiological Studies Depression Scale (CES-  
39  
40 D) short form was used to measure depressive symptoms <sup>20</sup>. The CES-D short form consists of  
41  
42 ten items, and each item is rated on a four-point Likert scale with answers ranging from 0 (rarely  
43  
44 or none of the time) to 3 (most or all of the time) and the total possible summary score of 0 to 30.  
45  
46 The time frame for the CES-D short form refers to the week prior to the interview. Item 5  
47  
48 (“feeling hopeful about the future”) and 8 (“feeling happy”) are reversely scored before analysis.  
49  
50 Higher scores corresponds to higher levels of depressive symptoms, and a score of 12 or higher  
51  
52 has been used as the cut-off point for depressive symptoms <sup>21</sup>.  
53  
54  
55

1  
2  
3 The CES-D short form has been validated among a subsample of 742 CHARLS  
4 participants aged 60 years and older, demonstrating adequate psychometric properties <sup>21</sup>. Two  
5 factors were identified by confirmatory factor analysis. Somatic retardation and depressive affect  
6 were identified as the first factor, and positive affect was identified as the second factor. The  
7 two-factor structure varied across both genders in multi-group analysis ( $\chi^2= 144.13$ ,  $p<0.001$ ).  $R^2$   
8 coefficient was used to measure the reliability of each item, with some of items differing  
9 between men and women. For example, depressive affect and somatic retardation explained 37%  
10 and 64% of the variance in the depression indicator (“bothered”) for men and women,  
11 respectively <sup>21</sup>.  
12  
13  
14  
15  
16  
17  
18  
19  
20  
21  
22  
23

24 **Measure of health conditions associated with depressive symptoms.** These factors  
25 included chronic conditions, overweight/obesity, sleep duration, and self-perceived health status.  
26 Information on chronic conditions was primarily based on self-reports except hypertension and  
27 diabetes. Participants were asked if they had been diagnosed with any of the following health  
28 conditions: arthritis, dyslipidemia, cancer (excluding minor skin cancers), liver diseases (except  
29 for fatty liver, tumors or cancer), cardiovascular diseases (heart attack, coronary heart disease,  
30 angina, congestive heart failure, or other heart problems), stroke, kidney disease (except for  
31 cancer or tumor), stomach or other gastrointestinal diseases (except for tumor or cancer),  
32 memory-related diseases, and asthma. Participants answered “yes” to these questions were  
33 defined as having these conditions.  
34  
35  
36  
37  
38  
39  
40  
41  
42  
43  
44  
45  
46

47 Hypertension was defined based on the most current guidelines from the American Heart  
48 Association, which have lowered the threshold of hypertension cut-off points to 130/80 mmHg <sup>22</sup>.  
49 A systolic blood pressure measurement of 130 mmHg and higher, or a diastolic measurement of  
50 80 mmHg and higher, or 130/80 mmHg and higher, or taking antihypertensive medications  
51  
52  
53  
54  
55  
56  
57  
58  
59  
60

1  
2  
3 including modern western medicine, traditional Chinese medicine, or using other treatment  
4 options for hypertension was considered as having hypertension<sup>22</sup>. Blood pressure was measured  
5 three times (approximately 45 seconds apart) for each participant on the left arm in a sitting  
6 position, using an electronic blood pressure monitor (Omron™ HEM-7112)<sup>23</sup>.  
7  
8  
9

10  
11  
12 The diagnosis of diabetes was based on the current guidelines from the American  
13 Diabetes Association<sup>24</sup>. A reading of 126 mg/dL or higher for fasting blood glucose, or a reading  
14 of 200 mg/dL or higher for random blood glucose, or a reading of 6.5% or higher for glycated  
15 hemoglobin, or use of insulin, or taking oral hypoglycemic medications including traditional  
16 Chinese medicine, modern western medicine, or other diabetes treatment was considered as  
17 having diabetes<sup>24</sup>.  
18  
19  
20  
21  
22  
23  
24  
25

26 Weight was measured to the nearest 0.1 kg using a digital scale (Omron™ HN-286,  
27 Yangzhou, China) on an even, uncarpeted surface, with participants removing heavy outer  
28 clothing. Height was measured without shoes to the nearest 0.1 cm using a stadiometer  
29 (Seca™213, Hangzhou, China). Body mass index (BMI, weight in kilograms divided by height  
30 in meters squared) was calculated from the participants' weight and height.  
31  
32  
33  
34  
35  
36  
37

38 Self-perceived health status was measured based on self-reports to the following question,  
39 “Would you rate health as...”, with five response options provided: excellent, very good, good,  
40 fair, and poor.  
41  
42  
43  
44

45 Nighttime sleep duration in hours was collected using a question, “During the past month,  
46 how many hours of actual sleep did you get at night (average hours for one night)? (This may be  
47 shorter than the number of hours you spend in bed.)”  
48  
49  
50

51 **Covariates.** Factors that could confound the main association were identified a priori  
52 from current literature. Covariates included age, gender<sup>3</sup>, education<sup>25</sup>, and marital status<sup>3 26</sup>.  
53  
54  
55  
56

1  
2  
3 Consistent with a prior CHARLS publications<sup>27 28</sup>, education was categorized as illiterate or no  
4 formal education, some primary school but can read and write, primary school including home  
5 schooling, and middle school or above. Marital status was grouped as married versus not married.  
6  
7

### 8 9 10 **Ethical Considerations**

11  
12 The CHARLS was approved by the Peking University Ethical Review Committee. The  
13 current study is a secondary analysis of the de-identified CHARLS public data. The Ethics  
14 Review Committee granted an exempt research determination to the current study.  
15  
16  
17

### 18 19 **Statistical Analysis**

20  
21 **Incidence of depressive symptoms.** The incidence of depressive symptoms was  
22 analyzed taking into account the complex survey design and nonresponse rate in both estimates  
23 and the corresponding standard errors. Participants were categorized into 5-year age groups. SAS  
24 PROC SURVEYFREQ procedure was used to obtain overall and gender-specific incidence of  
25 depressive symptoms among all participants and by the 5-year age groups. In addition, overall  
26 and gender-specific incidence of depressive symptoms was estimated by rural and urban areas.  
27  
28 We estimated the incidence of four outcomes of depressive symptoms: having depressive  
29 symptoms in the first follow-up survey (2013-2014); having depressive symptoms in the second  
30 follow-up survey (2015-2016); ever having depressive symptoms in the first or the second  
31 follow-up survey; and consistently having depressive symptoms in both follow-up surveys.  
32  
33  
34  
35  
36  
37  
38  
39  
40  
41  
42  
43

44  
45 **Prospective analysis.** Baseline characteristics of the participants were summarized as  
46 frequency and percentage for categorical variables and mean and standard deviation or median  
47 and interquartile range for continuous variables. Associations of baseline health conditions,  
48 including chronic conditions, overweight/obesity, sleep duration, and self-perceived health status,  
49 with the incidence of ever having depressive symptoms in 4 years of follow-up were evaluated  
50  
51  
52  
53  
54  
55

1  
2  
3 by a multivariate logistic regression model, while controlling for all covariates as mentioned  
4  
5 above. Odds ratios (ORs) and the corresponding 95% confidence intervals (CIs) were reported.  
6  
7 The SAS 9.4 (SAS Institute Inc., Cary, North Carolina) was used to perform the analyses. All the  
8  
9 p values were two-sided, and  $p < 0.05$  was considered significant.  
10

## 11 12 **Results**

### 13 14 **Sample Characteristics**

15  
16 A total of 10,288 participants aged 45 years or older was included in the analysis. As  
17  
18 shown in Table 1, the average age of all participants was 58.5 years and roughly half participants  
19  
20 (49.3%) were women. Most of participants (73.3%) lived in rural areas and 60.6% participants  
21  
22 had primary education or above. The majority of participants (90.0%) were married or living  
23  
24 with a partner at the time of data collection. About a third of the participants (31.5%) were  
25  
26 current smokers and 17.9% were current regular drinkers. Participants had an average BMI of  
27  
28 23.7 kg/m<sup>2</sup>. The mean duration of sleep per night was 6.7 hours, and less than 20% of  
29  
30 participants perceived their health status as very good or excellent. The mean CES-D short form  
31  
32 score was 5.1 at baseline.  
33  
34  
35  
36

### 37 38 **Incidence of Depressive Symptoms**

39  
40 As shown in Table 2 and in Figure 1, the incidence of ever having depressive symptoms  
41  
42 in 4 years was 22.3% (95% CI: 21.3%-23.3%). The incidence was much higher in rural areas  
43  
44 than that in urban areas (25.7% vs. 15.3%,  $p < .0001$ ). Women had a higher incidence of  
45  
46 depressive symptoms than men (27.9% vs. 16.7%,  $p < .0001$ ). There is no clear pattern of the  
47  
48 incidence of depressive symptoms over age groups (Figure 1). The incidence was highest among  
49  
50 the 65-70 years of age group and lowest among the 45-50 years of age group.  
51  
52  
53

### 54 55 **Baseline Risk Factors and Incident Depressive Symptoms**

1  
2  
3 As shown in Table 3, in the fully adjusted multivariable logistic regression model,  
4  
5 nighttime sleep duration and self-perceived health status were both inversely associated with the  
6  
7 risk of depressive symptoms. Specifically, participants with one-hour longer of nighttime sleep  
8  
9 had a 10% (95% CI: 7%-13%,  $p<.0001$ ) lower risk of developing depressive symptoms in 4  
10  
11 years of follow up. Compared to individuals who perceived their health status as poor, those who  
12  
13 perceived their health status as fair, good, very good, and excellent had a 42% (95% CI: 39%-  
14  
15 52%), 47% (95% CI: 36%-57%), 64% (95% CI: 54%-72%), and 62% (95% CI: 43%-74%) lower  
16  
17 risk of developing depressive symptoms, respectively. In addition, four chronic conditions,  
18  
19 including diabetes (OR=1.19, 95% CI: 1.00-1.42,  $p=.04$ ), chronic kidney disease (OR=1.32, 95%  
20  
21 CI: 1.04-1.67,  $p=.02$ ), chronic digestive disorders (OR=1.15, 95% CI: 1.01-1.31,  $p=.04$ ), and  
22  
23 arthritis (OR=1.43, 95% CI: 1.28-1.61,  $p<.0001$ ), were associated with higher risk of depressive  
24  
25 symptoms. However, baseline BMI was not associated with the onset of depressive symptoms in  
26  
27 this population (OR=0.99, 95% CI: 0.97-1.01). Chronic lung disease ( $p=.001$ ), heart disease  
28  
29 ( $p=.004$ ), and asthma ( $p=.02$ ) were positively associated with incidence of depressive symptoms  
30  
31 in the raw analysis, but became non-significant in the fully adjusted model (all  $p>.05$ ).  
32  
33  
34  
35  
36

### 37 Discussion

38  
39  
40 Through the analysis of data from a nationally representative sample of mid-aged and  
41  
42 older Chinese adults, we found that the incidence of depressive symptoms in a 4-year follow-up  
43  
44 was as high as 22.3%. Large disparities in the incidence of depressive symptoms were observed  
45  
46 between rural and urban areas and between men and women. Furthermore, longer nighttime  
47  
48 sleep duration and better self-perceived health status were both associated with lower risk of  
49  
50 depressive symptoms. In addition, diabetes, chronic kidney disease, chronic digestive disorders,  
51  
52  
53  
54  
55  
56

1  
2  
3 and arthritis at baseline increased the risk of depressive symptoms. However, baseline BMI was  
4  
5 not associated with depressive symptoms in this population.  
6

7  
8 Our study found that in four years of follow-up, about 22.3% of the mid-aged and older  
9  
10 Chinese adults developed depressive symptoms. Using the same database, a recent study  
11  
12 reported that the prevalence of depressive symptoms at CHARLS baseline survey was up to 26.2%  
13  
14<sup>13</sup>. Collectively, these findings revealed that depressive symptoms were a major public health  
15  
16 challenge in China, and intervention programs should be developed to reduce the burden of  
17  
18 depressive symptoms. Furthermore, large disparities were also observed between rural and urban  
19  
20 residents and between men and women. In particular, women and residents living in rural areas  
21  
22 were at a higher risk of developing depressive symptoms. The high incidence rate was not only  
23  
24 relevant to mid-aged and older Chinese adults, but also had implications for young children's  
25  
26 developmental outcomes. Many depressive symptoms cases remained undiagnosed, and even  
27  
28 among those who were aware of the condition, few of them sought treatment due to cultural  
29  
30 stigma<sup>9 10</sup>. Mid-aged and elderly grandparents are the primary caregivers of infants, toddlers,  
31  
32 and young children in rural China. Depressed caregivers were more likely to show negative  
33  
34 parenting interactions (e.g., limited facial and behavioral affect) with their children, and these  
35  
36 interactions were directly relevant for children's development<sup>29 30</sup>. A strong negative correlation  
37  
38 has been reported between the levels of depression of grandmothers and the levels of  
39  
40 developmental outcomes of the grandchildren in their care, including cognitive, language, social-  
41  
42 emotional, and motor functions<sup>31 32</sup>. Taken together, changes in social policies and intervention  
43  
44 programs should be developed to address timely diagnosis and treatment of depression for these  
45  
46 people, which will help improve young children's developmental outcomes in rural China.  
47  
48  
49  
50  
51  
52  
53  
54  
55  
56  
57  
58  
59  
60

1  
2  
3 Individuals with longer nighttime sleep duration had a lower risk of depressive symptoms.  
4  
5 This finding is in line with previous studies<sup>33 34</sup>. Sleep disorders are often the presenting and  
6  
7 core symptoms of depression<sup>35</sup>. However, treatment of depression did not resolve sleep  
8  
9 symptoms, which may confer a greater risk for depression recurrence and relapse<sup>35</sup>. Therefore,  
10  
11 sleep deprivation should be at least considered as an early indicator of depressive symptoms.  
12  
13 Individuals with sleep deprivation should be aware of their high risk of depressive symptoms and  
14  
15 increase nighttime sleep duration.  
16  
17

18  
19 Better self-perceived health status at baseline was associated with a lower risk of  
20  
21 depressive symptoms in the current study. The finding is consistent with studies among other  
22  
23 populations<sup>36 37</sup>. Self-perceived health is a powerful indicator of the overall health status of  
24  
25 elderly people<sup>38</sup>. Many factors, including sociodemographic characteristics, chronic diseases,  
26  
27 functional status, social relationships, neighborhood environment, and nutrition pattern, are all  
28  
29 important determinants of self-perceived health status<sup>38</sup>. These factors are also associated with  
30  
31 depressive symptoms. The current study adjusted most of the factors, except for functional status,  
32  
33 social relationship, and nutrition pattern, which were not available in the CHARLS database.  
34  
35 However, poorer self-perceived health status was still significantly associated with a higher risk  
36  
37 of depressive symptoms. Future studies additionally controlling for those factors will help  
38  
39 evaluate the contribution of those factors to the association of self-perceived health status with  
40  
41 depressive symptoms. Furthermore, such study may also help delineate whether self-perceived  
42  
43 health status may represent other factors that may lead to depressive symptoms. Finally, previous  
44  
45 studies also found that individuals with depressive disorders were more likely to report poor self-  
46  
47 perceived health status<sup>39 40</sup>. Therefore, there might be a bidirectional association between  
48  
49  
50  
51  
52  
53  
54  
55  
56  
57  
58  
59  
60



1  
2  
3 depressive symptoms and self-perceived health status. Future studies examining the bidirectional  
4 relationship are therefore needed.  
5  
6

7  
8 Among 12 chronic conditions, baseline chronic kidney disease increased the risk of  
9 depressive symptoms at follow-up. Although the underlying mechanisms have not been well  
10 understood, some authors suggested that the psychosocial and biologic changes in dialysis may  
11 explain this relationship <sup>41</sup>. In addition to chronic kidney disease, baseline diabetes also  
12 conferred a higher risk of symptoms of depression over time in this study. Similar results were  
13 reported in a meta-analysis of 11 studies, which found that people with diabetes at baseline had a  
14 24% higher risk of developing depression at follow-up compared to those without diabetes <sup>42</sup>.  
15 Furthermore, a high prevalence of depression among people with diabetes and/or chronic kidney  
16 disease has also been reported in cross-sectional studies <sup>43-45</sup>. In concordance with these findings,  
17 this study added further evidence that compared to other chronic conditions at baseline, baseline  
18 chronic kidney disease and diabetes were more likely to be associated with depressive symptoms  
19 over time in a population of mid-aged and older Chinese adults.  
20  
21  
22  
23  
24  
25  
26  
27  
28  
29  
30  
31  
32  
33  
34

35 Consistent with our study, a growing body of evidence reveals a high prevalence and  
36 incidence of depression among people with arthritis. For example, in a recent meta-analysis, the  
37 prevalence of major depressive disorder among patients with rheumatoid arthritis was 17% <sup>46</sup>. In  
38 a population-based cohort in Taiwan, patients with rheumatoid arthritis were 2.06 times more  
39 likely to develop depression compared with the control patients <sup>47</sup>. The high prevalence and  
40 incidence of depression among patients with arthritis may be attributed to several factors,  
41 including the impact of the diagnosis with no cure, arthritis symptoms and flare-ups, loss of work  
42 productivity, and side effects of medications <sup>48</sup>. In the current study, we found that chronic  
43 digestive disorders at baseline conferred a higher risk for depressive symptoms over time. In line  
44  
45  
46  
47  
48  
49  
50  
51  
52  
53  
54  
55  
56  
57  
58  
59  
60

1  
2  
3 with this finding, using the National Health Insurance Research Database in Taiwan, Lee et al.  
4  
5 found that irritable bowel syndrome was a risk factor for subsequent depressive and anxiety  
6  
7 disorders <sup>49</sup>. The digestive system is sensitive to the impact of emotional factors, because the  
8  
9 function of digestive system is jointly controlled by the endocrine system and vegetative nervous  
10  
11 system, and the center of both systems is located at the same place as the center of emotion <sup>50</sup>.  
12  
13

14  
15 Overweight/obesity is well established to interfere with mental health, with depressive  
16  
17 symptoms being more common among overweight/obese individuals than their normal-weight  
18  
19 counterparts, especially in overweight/obese women <sup>51 52</sup>. This relationship was further  
20  
21 confirmed by a meta-analysis of longitudinal studies, in which excess weight at baseline  
22  
23 increased a higher risk for subsequent depression at follow-up <sup>53</sup>. In contrast to these findings  
24  
25 from Western and European countries, using data from a prospective survey of a large,  
26  
27 representative sample of mid-aged and elderly community-dwelling residents in Mainland China,  
28  
29 we did not find a relationship between baseline BMI and subsequent depressive symptoms over  
30  
31 time. These inconsistent findings may suggest that because participants in the current study were  
32  
33 predominantly low in BMI at baseline (mean baseline BMI was 23.7 kg/m<sup>2</sup>), their likelihood of  
34  
35 experiencing depressive symptoms may have been lower compared to those participants reported  
36  
37 in Luppino et al <sup>53</sup>. However, these are preliminary findings that need to be further investigated  
38  
39 in future prospective studies in this population.  
40  
41  
42  
43

44  
45 The study has several important strengths. First, to the best of our knowledge, this is the  
46  
47 first study that examined the incidence of depressive symptoms in a nationally representative  
48  
49 population in China. As noted above, previous studies have primarily focused on the prevalence  
50  
51 of depressive symptoms <sup>3 11 13 14</sup> or investigated the incidence of depressive symptoms in a  
52  
53 regional sample <sup>54</sup>. Second, since the sample was representative of community-dwelling mid-  
54  
55

1  
2  
3 aged and older Chinese adults, the results can be generalized to mid-aged and older Chinese  
4 adults. Third, a Chinese specific cut-off point of the CES-D short form has been used, and the  
5 cut-off point was validated among mid-aged and older Chinese adults <sup>21</sup>. Therefore, our study  
6 provided a more reliable estimate of the incidence of depressive symptoms. Finally, strict quality  
7 control measures, including GPS matching, data checking, recording and checking interviews,  
8 and calling back participants, were implemented at each stage of the CHARLS to ensure high  
9 quality data.  
10  
11  
12  
13  
14  
15  
16  
17  
18

19 There are also some limitations in this study that should be acknowledged. First,  
20 depressive symptoms were based on self-reports instead of clinical diagnosis. Therefore,  
21 information bias may be present. However, with a longitudinal design, information bias in the  
22 current study was likely to be non-differential. Since non-differential misclassification generally  
23 affects the association estimates towards the null, our study findings were more robust. Second,  
24 nighttime sleep duration was measured based on self-reports. The use of self-report measures in  
25 the CHARLS surveys may have biased study results, since participants may consistently under-  
26 or overestimate their nighttime sleep duration <sup>55</sup>. Objective or direct measures of sleep duration  
27 should be used to increase precision and accuracy of self-report assessment methods. Finally,  
28 this study was a prospective analysis of baseline risk factors of depressive symptoms at follow-  
29 up, and no causal associations between these predictors and depressive symptoms can be drawn  
30 from the analysis.  
31  
32  
33  
34  
35  
36  
37  
38  
39  
40  
41  
42  
43  
44  
45  
46

47 The findings of the current study have important implications for clinical practice. Health  
48 care professionals are encouraged to address the needs for better mental health in older adults <sup>56</sup>.  
49 In view of the high incidence of depressive symptoms (22.3%) among mid-aged and elderly  
50 Chinese adults, the findings of this study highlight the importance of developing an appropriate  
51  
52  
53  
54  
55  
56  
57  
58  
59  
60

1  
2  
3 screening test to identify depressive symptoms for those who are vulnerable and ensure these  
4 individuals can receive early interventions for depressive symptoms. The screening test should  
5  
6 include items such as areas of living (rural or urban areas), gender, nighttime sleep duration, self-  
7  
8 perceived health status, and certain chronic conditions, especially chronic kidney disease,  
9  
10 diabetes, arthritis, and chronic digestive disorders. In addition, intervention strategies that  
11  
12 address short nighttime sleep duration may be used to alleviate depressive symptoms and  
13  
14 improve mental health in this population. Intervention programs should also be prioritized to  
15  
16 target at specific populations, such as women and residents living in rural areas, as these  
17  
18 populations were at a higher risk of developing depressive symptoms. Finally, new patients with  
19  
20 chronic kidney disease, diabetes, arthritis, or chronic digestive disorders should be screened for  
21  
22 depressive symptoms using the CES-D short form at the initial visit. Persons with depressive  
23  
24 symptoms (a score of 12 or higher) should then be assessed by a clinician using the structured  
25  
26 clinical interview for Diagnostic and Statistical Manual of Mental Disorders, Fifth Edition.  
27  
28 Potential participants with serious depressive symptoms should be referred immediately to a  
29  
30 mental health professional. Individuals with these chronic conditions are particularly vulnerable  
31  
32 to the deleterious effects of affective symptoms, since symptoms of depression is a known risk  
33  
34 factor for noncompliance with medical treatment and adverse health outcomes<sup>48 49 57 58</sup>.

### 35 36 37 38 39 40 41 42 **Conclusions**

43  
44 To conclude, our study found a high incidence of depressive symptoms in 4 years of  
45  
46 follow-up among a nationally representative mid-aged and older Chinese population. In addition,  
47  
48 great disparities in the incidence of depressive symptoms were observed between individuals  
49  
50 living in rural and urban areas and between men and women. Furthermore, we identified that  
51  
52 worse self-perceived health, shorter nighttime sleep duration, diabetes, chronic kidney disease,  
53  
54

1  
2  
3 chronic digestive disorders, and arthritis at baseline increased the risk for depressive symptoms.  
4  
5 These findings supported the importance of baseline status to longitudinal changes in depressive  
6  
7 symptoms. Interventions for vulnerable mid-aged and older adults should focus on addressing  
8  
9 short nighttime sleep duration. These findings also help identify individuals at a higher risk for  
10  
11 depressive symptoms, such as those with chronic kidney disease, chronic digestive disorders,  
12  
13 arthritis, and diabetes, or women and residents living in rural areas, so that early interventions  
14  
15 can be implemented to prevent depressive symptoms in these people.  
16  
17  
18

### 19 **Figure Legend**

20  
21 Figure 1. The Incidence of Depressive Symptoms in 4 Years of Follow-up among  
22  
23 Participants of the CHARLS  
24  
25  
26  
27  
28  
29  
30  
31  
32  
33  
34  
35  
36  
37  
38  
39  
40  
41  
42  
43  
44  
45  
46  
47  
48  
49  
50  
51  
52  
53  
54  
55  
56  
57  
58  
59  
60

### **Contributorship Statement**

All authors contribute to the conception and design of this study. YW, YY, and DW were responsible for the design, analysis, drafting and revision of this manuscript. CL and JL were responsible for interpretation of data and preparation of the manuscript.

### **Competing Interests Statement**

None declared.

### **Funding Statement**

This work was supported by the Sichuan Science and Technology Program grant number 2018JY0306 to Dr. Dongmei Wu. The CHARLS is funded by Peking University, the National Natural Science Foundation of China, the Behavioral and Social Research Division of the National Institute on Aging, and the World Bank.

### **Acknowledgments**

The authors would gratefully acknowledge the assistance Dr. Tingting Liu, an assistant professor at University of Arkansas Eleanor Mann School of Nursing for editing the manuscript.

### **Patient Consent for Publication**

Not required.

### **Data Sharing Statement**

The study used a public data from the CHARLS that were obtained from the CHARLS home page at <http://charls.pku.edu.cn/en>.

## References

1. Qin X, Wang S, Hsieh C. The prevalence of depression and depressive symptoms among adults in China: Estimation based on a National Household Survey. *China Economic Review* 2016 doi: 10.1016/j.chieco.2016.04.001
2. World Health Organization. Depression and other common mental disorders: Global health estimates. Geneva, Swiss: World Health Organization 2017.
3. Lei X, Sun X, Strauss J, et al. Depressive symptoms and SES among the mid-aged and elderly in China: Evidence from the China Health and Retirement Longitudinal Study national baseline. *Social Science & Medicine* 2014;120:224-32. doi: 10.1016/j.socscimed.2014.09.028 [published Online First: 2014/09/28]
4. Diniz BS, Butters MA, Albert SM, et al. Late-life depression and risk of vascular dementia and Alzheimer's disease: Systematic review and meta-analysis of community-based cohort studies. *The British journal of psychiatry : the journal of mental science* 2013;202:329-35. doi: 10.1192/bjp.bp.112.118307 [published Online First: 2013/05/03]
5. Sivertsen H, Bjørkløf GH, Engedal K, et al. Depression and quality of life in older persons: A review. *Dementia and geriatric cognitive disorders* 2015;40:311-39. doi: 10.1159/000437299
6. Wang CW, Chan CL, Yip PS. Suicide rates in China from 2002 to 2011: An update. *Social psychiatry and psychiatric epidemiology* 2014;49:929-41. doi: 10.1007/s00127-013-0789-5 [published Online First: 2013/11/19]
7. Holzapfel N, Lowe B, Wild B, et al. Self-care and depression in patients with chronic heart failure. *Heart & Lung* 2009;38:392-97. doi: 10.1016/j.hrtlng.2008.11.001 [published Online First: 2009/09/17]

- 1  
2  
3 8. Gonzalez JS, Safren SA, Delahanty LM, et al. Symptoms of depression prospectively predict  
4  
5 poorer self-care in patients with type 2 diabetes. *Diabetetic Medicine* 2008;25:1102-07.  
6  
7 doi: 10.1111/j.1464-5491.2008.02535.x [published Online First: 2009/02/03]  
8  
9
- 10 9. Zeng B, Sun W, Gary RA, et al. Towards a conceptual model of diabetes self-management  
11  
12 among Chinese immigrants in the United States. *International journal of environmental*  
13  
14 *research and public health* 2014;11:6727-42. doi: 10.3390/ijerph110706727 [published  
15  
16 Online First: 2014/07/01]  
17  
18
- 19 10. He P, Hu Y, Li C, et al. Predictors of depressive symptoms among mid-aged and older men  
20  
21 with diabetes in China. *Research and theory for nursing practice* 2019;33(1):6-22. doi:  
22  
23 10.1891/1541-6577.33.1.6 [published Online First: 2019/02/24]  
24  
25
- 26 11. Xu Y, Yang J, Gao J, et al. Decomposing socioeconomic inequalities in depressive  
27  
28 symptoms among the elderly in China. *BMC public health* 2016;16:1214. doi:  
29  
30 10.1186/s12889-016-3876-1 [published Online First: 2016/12/03]  
31  
32
- 33 12. United Nations Department of Economic and Social Affairs/Population Division. World  
34  
35 population prospects: The 2012 revision, volume II: Demophic profiles. New York, NY:  
36  
37 United Nations 2012.  
38  
39
- 40 13. Li C, Miles T, Shen L, et al. Early-life exposure to severe famine and subsequent risk of  
41  
42 depressive symptoms in late adulthood: The China Health and Retirement Longitudinal  
43  
44 Study. *British Journal of Psychiatry* 2018;213:579-86. doi: 10.1192/bjp.2018.116  
45  
46 [published Online First: 2018/08/31]  
47  
48
- 49 14. Yu J, Li J, Cuijpers P, et al. Prevalence and correlates of depressive symptoms in Chinese  
50  
51 older adults: A population-based study. *International journal of geriatric psychiatry*  
52  
53 2012;27:305-12. doi: 10.1002/gps.2721 [published Online First: 2011/05/04]  
54  
55  
56  
57  
58  
59  
60



- 1  
2  
3 15. Alvaro PK, Roberts RM, Harris JK. A systematic review assessing bidirectionality between  
4  
5 sleep disturbances, anxiety, and depression. *Sleep* 2013;36:1059-68. doi:  
6  
7 10.5665/sleep.2810 [published Online First: 2013/07/03]  
8  
9
- 10 16. Wilson-Genderson M, Heid AR, Pruchno R. Onset of multiple chronic conditions and  
11  
12 depressive symptoms: A life events perspective. *Innovation in Aging* 2017;1:igx022-  
13  
14 igx22. doi: 10.1093/geroni/igx022  
15  
16
- 17 17. Qian J, Li N, Ren X. Obesity and depressive symptoms among Chinese people aged 45 and  
18  
19 over. *Scientific reports* 2017;7:45637. doi: 10.1038/srep45637  
20  
21
- 22 18. Zhao Y, Hu Y, Smith JP, et al. Cohort profile: The China Health and Retirement  
23  
24 Longitudinal Study (CHARLS). *International journal of epidemiology* 2014;43:61-68.  
25  
26 doi: 10.1093/ije/dys203 [published Online First: 2012/12/18]  
27  
28
- 29 19. Li C, Liu T, Sun W, et al. Prevalence and risk factors of arthritis in a middle-aged and older  
30  
31 Chinese population: The China Health and Retirement Longitudinal Study.  
32  
33 *Rheumatology (Oxford, England)* 2015;54:697-706. doi: 10.1093/rheumatology/keu391  
34  
35 [published Online First: 2014/10/08]  
36  
37
- 38 20. Andresen EM, Malmgren JA, Carter WB, et al. Screening for depression in well older adults:  
39  
40 Evaluation of a short form of the CES-D (Center for Epidemiologic Studies Depression  
41  
42 Scale). *American journal of preventive medicine* 1994;10(2):77-84. [published Online  
43  
44 First: 1994/03/01]  
45  
46
- 47 21. Chen H, Mui AC. Factorial validity of the Center for Epidemiologic Studies Depression  
48  
49 Scale short form in older population in China. *International psychogeriatrics / IPA*  
50  
51 2014;26:49-57. doi: 10.1017/s1041610213001701 [published Online First: 2013/10/16]  
52  
53  
54  
55  
56  
57  
58  
59  
60

- 1  
2  
3 22. Whelton PK, Carey RM, Aronow WS, et al. 2017  
4  
5 ACC/AHA/AAPA/ABC/ACPM/AGS/APhA/ASH/ASPC/NMA/PCNA Guideline for the  
6  
7 Prevention, Detection, Evaluation, and Management of High Blood Pressure in Adults:  
8  
9 Executive Summary: A Report of the American College of Cardiology/American Heart  
10  
11 Association Task Force on Clinical Practice Guidelines. *Circulation* 2018;138(17):e426-  
12  
13 e83. doi: 10.1161/cir.0000000000000597 [published Online First: 2018/10/26]  
14  
15  
16  
17 23. Zhao Y, Crimmins E, Hu P, et al. China Health And Retirement Longitudinal Study: 2011-  
18  
19 2012 national baseline blood data users' guide. Beijing, China: China Center for  
20  
21 Economic Research, Peking Universtiy 2014.  
22  
23  
24 24. American Diabetes Association. 2. Classification and diagnosis of diabetes: Standards of  
25  
26 medical care in diabetes-2018. *Diabetes care* 2018;41:S13-S27. doi: 10.2337/dc18-S002  
27  
28 [published Online First: 2017/12/10]  
29  
30  
31 25. Bjelland I, Krokstad S, Mykletun A, et al. Does a higher educational level protect against  
32  
33 anxiety and depression? The HUNT study. *Social science & medicine (1982)*  
34  
35 2008;66:1334-45. doi: 10.1016/j.socscimed.2007.12.019 [published Online First:  
36  
37 2008/02/01]  
38  
39  
40 26. Cheng HG, Chen S, McBride O, et al. Prospective relationship of depressive symptoms,  
41  
42 drinking, and tobacco smoking among middle-aged and elderly community-dwelling  
43  
44 adults: Results from the China Health and Retirement Longitudinal Study (CHARLS).  
45  
46 *Journal of affective disorders* 2016;195:136-43. doi: 10.1016/j.jad.2016.02.023  
47  
48 [published Online First: 2016/02/20]  
49  
50  
51 27. Zuo M, Gan C, Liu T, et al. Physical predictors of cognitive function in individuals with  
52  
53 hypertension: Evidence from the CHARLS basline survey. *Western journal of nursing*  
54  
55

- 1  
2  
3  
4  
5  
6  
7  
8  
9  
10  
11  
12  
13  
14  
15  
16  
17  
18  
19  
20  
21  
22  
23  
24  
25  
26  
27  
28  
29  
30  
31  
32  
33  
34  
35  
36  
37  
38  
39  
40  
41  
42  
43  
44  
45  
46  
47  
48  
49  
50  
51  
52  
53  
54  
55  
56  
57  
58  
59  
60
- research* 2019;41(4):592-614. doi: 10.1177/0193945918770794 [published Online First: 2018/05/11]
28. Zhang M, Liu T, Li C, et al. Physical performance and cognitive functioning among individuals with diabetes: Findings from the China Health and Retirement Longitudinal Study Baseline Survey. *Journal of advanced nursing* 2019;75(5):1029-41. doi: 10.1111/jan.13901 [published Online First: 2018/11/07]
29. Lovejoy MC, Graczyk PA, O'Hare E, et al. Maternal depression and parenting behavior: A meta-analytic review. *Clinical psychology review* 2000;20(5):561-92. [published Online First: 2000/06/22]
30. Pelaez M, Field T, Pickens JN, et al. Disengaged and authoritarian parenting behavior of depressed mothers with their toddlers. *Infant behavior & development* 2008;31(1):145-8. doi: 10.1016/j.infbeh.2007.06.002 [published Online First: 2007/07/27]
31. Yue A, Gao J, Yang M, et al. Caregiver depression and early child development: A mixed-methods study from rural China. *Frontiers in psychology* 2018;9:2500. doi: 10.3389/fpsyg.2018.02500 [published Online First: 2019/01/09]
32. Zhang S, Dang R, Yang N, et al. Effect of caregiver's mental health on early childhood development across different rural communities in China. *International journal of environmental research and public health* 2018;15(11) doi: 10.3390/ijerph15112341 [published Online First: 2018/10/27]
33. Sun Y, Shi L, Bao Y, et al. The bidirectional relationship between sleep duration and depression in community-dwelling middle-aged and elderly individuals: Evidence from a longitudinal study. *Sleep medicine* 2018;52:221-29. doi: 10.1016/j.sleep.2018.03.011 [published Online First: 2018/06/05]

- 1  
2  
3 34. Li Y, Wu Y, Zhai L, et al. Longitudinal association of sleep duration with depressive  
4  
5 symptoms among middle-aged and older Chinese. *Scientific reports* 2017;7:11794. doi:  
6  
7 10.1038/s41598-017-12182-0 [published Online First: 2017/09/20]  
8  
9
- 10 35. Nutt D, Wilson S, Paterson L. Sleep disorders as core symptoms of depression. *Dialogues in*  
11  
12 *clinical neuroscience* 2008;10(3):329-36. [published Online First: 2008/11/05]  
13  
14
- 15 36. Cole MG, Dendukuri N. Risk factors for depression among elderly community subjects: A  
16  
17 systematic review and meta-analysis. *American Journal of Psychiatry* 2003;160:1147-56.  
18  
19 doi: 10.1176/appi.ajp.160.6.1147 [published Online First: 2003/06/05]  
20  
21
- 22 37. Conti CL, Barbosa WM, Simão JBP, et al. Pesticide exposure, tobacco use, poor self-  
23  
24 perceived health and presence of chronic disease are determinants of depressive  
25  
26 symptoms among coffee growers from Southeast Brazil. *Psychiatry Res* 2018;260:187-92.  
27  
28 doi: 10.1016/j.psychres.2017.11.063 [published Online First: 2017/12/01]  
29  
30
- 31 38. Machón M, Vergara I, Dorronsoro M, et al. Self-perceived health in functionally independent  
32  
33 older people: Associated factors. *BMC geriatrics* 2016;16:66. doi: 10.1186/s12877-016-  
34  
35 0239-9 [published Online First: 2016/03/11]  
36  
37
- 38 39. Leão T, Perelman J. Depression symptoms as mediators of inequalities in self-reported health:  
39  
40 the case of Southern European elderly. *J Public Health (Oxf)* 2018;40(4):756-63. doi:  
41  
42 10.1093/pubmed/fox173  
43  
44
- 45 40. Alarcão V, Madeira T, Peixoto-Plácido C, et al. Gender differences in psychosocial  
46  
47 determinants of self-perceived health among Portuguese older adults in nursing homes.  
48  
49 *Aging Ment Health* 2018:1-8. doi: 10.1080/13607863.2018.1471583 [published Online  
50  
51 First: 2018/05/23]  
52  
53  
54  
55  
56  
57  
58  
59  
60

- 1  
2  
3 41. Sonikian M, Metaxaki P, Papavasileiou D, et al. Effects of interleukin-6 on depression risk in  
4  
5 dialysis patients. *American journal of nephrology* 2010;31:303-08. doi:  
6  
7 10.1159/000285110 [published Online First: 2010/02/18]  
8  
9  
10 42. Nouwen A, Winkley K, Twisk J, et al. Type 2 diabetes mellitus as a risk factor for the onset  
11  
12 of depression: A systematic review and meta-analysis. *Diabetologia* 2010;53:2480-86.  
13  
14 doi: 10.1007/s00125-010-1874-x [published Online First: 2010/08/17]  
15  
16  
17 43. Anderson RJ, Freedland KE, Clouse RE, et al. The prevalence of comorbid depression in  
18  
19 adults with diabetes: A meta-analysis. *Diabetes care* 2001;24(6):1069-78. [published  
20  
21 Online First: 2001/05/26]  
22  
23  
24 44. Palmer S, Vecchio M, Craig JC, et al. Prevalence of depression in chronic kidney disease:  
25  
26 Systematic review and meta-analysis of observational studies. *Kidney international*  
27  
28 2013;84:179-91. doi: 10.1038/ki.2013.77 [published Online First: 2013/03/15]  
29  
30  
31 45. Roy T, Lloyd CE. Epidemiology of depression and diabetes: A systematic review. *Journal of*  
32  
33 *affective disorders* 2012;142 Suppl:S8-S21. doi: 10.1016/s0165-0327(12)70004-6  
34  
35 [published Online First: 2012/10/25]  
36  
37  
38 46. Matcham F, Rayner L, Steer S, et al. The prevalence of depression in rheumatoid arthritis: a  
39  
40 systematic review and meta-analysis. *Rheumatology (Oxford, England)*  
41  
42 2013;52(12):2136-48. doi: 10.1093/rheumatology/ket169 [published Online First:  
43  
44 2013/09/05]  
45  
46  
47 47. Wang SL, Chang CH, Hu LY, et al. Risk of developing depressive disorders following  
48  
49 rheumatoid arthritis: A nationwide population-based study. *PloS one* 2014;9(9):e107791.  
50  
51 doi: 10.1371/journal.pone.0107791 [published Online First: 2014/09/17]  
52  
53  
54  
55  
56  
57  
58  
59  
60

- 1  
2  
3 48. Vallerand IA, Patten SB, Barnabe C. Depression and the risk of rheumatoid arthritis. *Current*  
4  
5 *Opinion in Rheumatology* 2019;31(3):279-84. doi: 10.1097/bor.0000000000000597  
6  
7  
8 49. Lee YT, Hu LY, Shen CC, et al. Risk of psychiatric disorders following irritable bowel  
9  
10 syndrome: A nationwide population-based cohort study. *PloS one* 2015;10(7):e0133283.  
11  
12 doi: 10.1371/journal.pone.0133283 [published Online First: 2015/07/30]  
13  
14  
15 50. Zipfel S, Sammet I, Rapps N, et al. Gastrointestinal disturbances in eating disorders: Clinical  
16  
17 and neurobiological aspects. *Autonomic neuroscience : basic & clinical* 2006;129(1-  
18  
19 2):99-106. doi: 10.1016/j.autneu.2006.07.023 [published Online First: 2006/09/12]  
20  
21  
22 51. Atlantis E, Baker M. Obesity effects on depression: Systematic review of epidemiological  
23  
24 studies. *International journal of obesity (2005)* 2008;32:881-91. doi: 10.1038/ijo.2008.54  
25  
26 [published Online First: 2008/04/17]  
27  
28  
29 52. de Wit L, Luppino F, van Straten A, et al. Depression and obesity: A meta-analysis of  
30  
31 community-based studies. *Psychiatry research* 2010;178:230-35. doi:  
32  
33 10.1016/j.psychres.2009.04.015 [published Online First: 2010/05/14]  
34  
35  
36 53. Luppino FS, de Wit LM, Bouvy PF, et al. Overweight, obesity, and depression: A systematic  
37  
38 review and meta-analysis of longitudinal studies. *Archives of general psychiatry*  
39  
40 2010;67:220-29. doi: 10.1001/archgenpsychiatry.2010.2 [published Online First:  
41  
42 2010/03/03]  
43  
44  
45 54. Wang T, Xiao S, Yang C, et al. Prevalence and incidence of depression disorder and  
46  
47 cognitive impairment in the elderly in Shanghai, China. *Alzheimer's & Dementia*  
48  
49 2015;11(7):P832-P33.  
50  
51  
52 55. Li J, Cacchione PZ, Hodgson N, et al. Afternoon napping and cognition in Chinese older  
53  
54 adults: Findings from the China Health and Retirement Longitudinal Study Baseline  
55  
56  
57  
58  
59  
60

- 1  
2  
3 Assessment. *Journal of American Geriatrics Society* 2017;65:373-80. doi:  
4 10.1111/jgs.14368 [published Online First: 2016/12/21]  
5  
6  
7  
8 56. Avasthi A, Grover S. Clinical practice guidelines for management of depression in elderly.  
9  
10 *Indian journal of psychiatry* 2018;60:S341-S62. doi: 10.4103/0019-5545.224474  
11  
12 [published Online First: 2018/03/15]  
13  
14  
15 57. Zhang Y, Ting RZ, Yang W, et al. Depression in Chinese patients with type 2 diabetes:  
16  
17 Associations with hyperglycemia, hypoglycemia, and poor treatment adherence. *Journal*  
18  
19 *of diabetes* 2015;7:800-8008. doi: 10.1111/1753-0407.12238 [published Online First:  
20  
21 2014/10/29]  
22  
23  
24 58. Fischer MJ, Kimmel PL, Greene T, et al. Elevated depressive affect is associated with  
25  
26 adverse cardiovascular outcomes among African Americans with chronic kidney disease.  
27  
28 *Kidney international* 2011;80:670-78. doi: 10.1038/ki.2011.153 [published Online First:  
29  
30 2011/06/03]  
31  
32  
33  
34  
35  
36  
37  
38  
39  
40  
41  
42  
43  
44  
45  
46  
47  
48  
49  
50  
51  
52  
53  
54  
55  
56  
57  
58  
59  
60

## Tables

**Table 1. Baseline characteristics of the CHARLS participants free of depressive symptoms**

| Variable                                       | Distribution   |
|------------------------------------------------|----------------|
| N                                              | 10,288         |
| age, years, mean (SD)                          | 58.5 (9.8)     |
| Male, n (%)                                    | 5845 (50.7%)   |
| Living in rural areas, n (%)                   | 8,440 (73.3%)  |
| Education, n (%)                               |                |
| <i>No formal education or illiterate</i>       | 2,736 (23.7%)  |
| <i>Some primary school</i>                     | 1,804 (15.7%)  |
| <i>Finished primary school</i>                 | 2,590 (22.5%)  |
| <i>Junior high school or above</i>             | 4,394 (38.1%)  |
| Currently married, n (%)                       | 10,375 (90.0%) |
| Smoking status, n (%)                          |                |
| <i>Current smoker</i>                          | 3,629 (31.5%)  |
| <i>Former smoker</i>                           | 1,034 (9.0%)   |
| <i>Never smoking</i>                           | 6,868 (60.0%)  |
| Drinking status, n (%)                         |                |
| <i>Regular drinkers</i>                        | 1,951 (17.9%)  |
| <i>Occasional drinkers</i>                     | 476 (4.4%)     |
| <i>Former drinkers</i>                         | 646 (5.9%)     |
| <i>Never drinking</i>                          | 7,833 (71.8%)  |
| Weight, kg, mean (SD)                          | 60 (11.8)      |
| Height, m, mean (SD)                           | 1.6 (0.1)      |
| Body mass index, kg/m <sup>2</sup> , mean (SD) | 23.7 (4)       |
| Sleeping duration, hours, mean (SD)            | 6.7 (1.7)      |
| CES-D short form score                         | 5.1 (3.3)      |
| Self-perceived health status, n (%)            |                |
| <i>Excellent</i>                               | 483 (4.2%)     |
| <i>Very good</i>                               | 1,744 (15.1%)  |
| <i>Good</i>                                    | 4,136 (35.9%)  |
| <i>Fair</i>                                    | 3,977 (34.5%)  |
| <i>Poor</i>                                    | 1,187 (10.3%)  |
| Chronic conditions, n (%)                      |                |
| <i>Hypertension</i>                            | 4,045 (40.3%)  |
| <i>Dyslipidemia</i>                            | 1,016 (9.0%)   |
| <i>Diabetes</i>                                | 1,210 (15.0%)  |
| <i>Cancer</i>                                  | 97 (0.8%)      |
| <i>Liver disease</i>                           | 387 (3.4%)     |
| <i>Heart disease</i>                           | 1,162 (10.1%)  |
| <i>Stroke</i>                                  | 188 (1.6%)     |
| <i>Kidney disease</i>                          | 563 (4.9%)     |



|   |                                 |               |
|---|---------------------------------|---------------|
| 1 |                                 |               |
| 2 |                                 |               |
| 3 | <i>Gastrointestinal disease</i> | 2,180 (18.9%) |
| 4 | <i>Dementia</i>                 | 105 (0.9%)    |
| 5 | <i>Arthritis</i>                | 3,221 (28.0%) |
| 6 | <i>Asthma</i>                   | 312 (2.7%)    |
| 7 |                                 |               |

8 *Note.* CES-D=Center for Epidemiologic Study of Depression short form; SD=standard deviation.  
9

10  
11  
12  
13  
14  
15  
16  
17  
18  
19  
20  
21  
22  
23  
24  
25  
26  
27  
28  
29  
30  
31  
32  
33  
34  
35  
36  
37  
38  
39  
40  
41  
42  
43  
44  
45  
46  
47  
48  
49  
50  
51  
52  
53  
54  
55  
56  
57  
58  
59  
60

For peer review only

**Table 2. Incidence of depressive symptoms among the CHARLS participants**

|         | Ever having depressive symptoms | Depressive symptoms in both visits 2 & 3 | Depressive symptoms in 2 years | Depressive symptoms in 4 years |
|---------|---------------------------------|------------------------------------------|--------------------------------|--------------------------------|
| Overall | 22.3 (21.3-23.3)                | 4.4 (4.0-4.9)                            | 13.2 (12.5-14.1)               | 16.8 (15.9-17.7)               |
| Rural   | 25.7 (24.6-26.8)                | 5.3 (4.8-5.8)                            | 15.3 (14.3-16.2)               | 18.8 (17.8-19.8)               |
| Urban   | 15.3 (13.4-17.2)                | 2.6 (1.9-3.3)                            | 9.0 (7.4-10.6)                 | 12.2 (10.4-14.1)               |
| Men     | 16.7 (15.5-17.9)                | 3.0 (2.5-3.5)                            | 9.9 (9.0-10.9)                 | 12.2 (11.1-13.2)               |
| Women   | 27.9 (26.4-29.4)                | 5.8 (5.1-6.6)                            | 16.6 (15.3-17.9)               | 21.5 (20.1-22.9)               |

For peer review only

**Table 3. Raw and multi-variables adjusted associations with the incidence of depressive symptoms in 4 years of follow-up.**

| Variables                                         | Multi-Variate Adjusted |                  | Raw Association  |                  |
|---------------------------------------------------|------------------------|------------------|------------------|------------------|
|                                                   | OR (95% CI)            | P                | OR (95% CI)      | P                |
| Age, per year older                               | 0.99 (0.98-0.99)       | <b>0.001</b>     | 0.99 (0.99-1.00) | 0.59             |
| Male vs. Female                                   | 0.60 (0.51-0.71)       | <b>&lt;.0001</b> | 0.51 (0.46-0.56) | <b>&lt;.0001</b> |
| Education level                                   |                        |                  |                  |                  |
| <i>No formal education or illiterate</i>          | ref.                   | <b>&lt;.0001</b> | ref.             | <b>&lt;.0001</b> |
| <i>Some primary school</i>                        | 1.06 (0.90-1.25)       |                  | 0.93 (0.80-1.08) |                  |
| <i>Finished primary school</i>                    | 0.83 (0.71-0.97)       |                  | 0.67 (0.57-0.77) |                  |
| <i>Junior high school or above</i>                | 0.71 (0.61-0.84)       |                  | 0.48 (0.42-0.55) |                  |
| Rural vs. Urban                                   | 1.61 (1.38-1.88)       | <b>&lt;.0001</b> | 1.72 (1.50-1.96) | <b>&lt;.0001</b> |
| Not married vs Married                            | 1.25 (1.04-1.51)       | <b>0.02</b>      | 1.28 (1.08-1.51) | <b>0.004</b>     |
| Smoking status                                    |                        |                  |                  |                  |
| <i>Non-smokers</i>                                | ref.                   |                  | ref.             |                  |
| <i>Current smokers</i>                            | 1.02 (0.86-1.20)       | <b>0.03</b>      | 0.51 (0.41-0.62) | <b>&lt;.0001</b> |
| <i>Former smokers</i>                             | 0.75 (0.59-0.96)       |                  | 0.68 (0.60-0.76) |                  |
| Drinking status                                   |                        |                  |                  |                  |
| <i>Never drinkers</i>                             | Ref.                   |                  | ref.             |                  |
| <i>Former drinkers</i>                            | 1.02 (0.80-1.30)       | 0.15             | 0.84 (0.67-1.04) | <b>&lt;.0001</b> |
| <i>Occasional drinkers</i>                        | 0.79 (0.59-1.06)       |                  | 0.59 (0.45-0.78) |                  |
| <i>Regular drinkers</i>                           | 0.85 (0.71-1.01)       |                  | 0.59 (0.51-0.68) |                  |
| Body mass index, per 1 kg/m <sup>2</sup> increase | 0.99 (0.98-1.01)       | 0.20             | 0.99 (0.98-1.00) | 0.14             |
| Self-perceived health status                      |                        |                  |                  |                  |
| <i>Excellent</i>                                  | 0.36 (0.25-0.52)       | <b>&lt;.0001</b> | 0.28 (0.20-0.39) | <b>&lt;.0001</b> |
| <i>Very good</i>                                  | 0.36 (0.29-0.45)       |                  | 0.28 (0.23-0.35) |                  |
| <i>Good</i>                                       | 0.53 (0.44-0.63)       |                  | 0.45 (0.38-0.53) |                  |
| <i>Fair</i>                                       | 0.61 (0.52-0.73)       |                  | 0.56 (0.48-0.66) |                  |
| <i>Poor</i>                                       | ref.                   |                  | ref.             |                  |
| Sleep duration, per hour longer                   | 0.89 (0.87-0.92)       | <b>&lt;.0001</b> | 0.88 (0.85-0.90) | <b>&lt;.0001</b> |
| Hypertension (Y vs. N)                            | 1.07 (0.95-1.21)       | 0.25             | 1.07 (0.96-1.18) | 0.22             |
| Dyslipidemia (Y vs. N)                            | 0.85 (0.69-1.04)       | 0.12             | 0.91 (0.76-1.09) | 0.29             |
| Diabetes (Y vs. N)                                | 1.19 (1.00-1.42)       | <b>0.04</b>      | 1.11 (0.95-2.30) | 0.19             |
| Cancer (Y vs. N)                                  | 0.92 (0.48-1.77)       | 0.80             | 1.17 (0.65-2.12) | 0.61             |
| Chronic Lung Disease (Y vs. N)                    | 1.18 (0.97-1.44)       | 0.10             | 1.33 (1.12-1.58) | <b>0.001</b>     |
| Chronic Liver Disease (Y vs. N)                   | 0.90 (0.67-1.22)       | 0.51             | 1.04 (0.79-1.37) | 0.81             |
| Heart Disease (Y vs. N)                           | 1.06 (0.88-1.28)       | 0.54             | 1.27 (1.08-1.49) | <b>0.004</b>     |
| Stroke (Y vs. N)                                  | 0.88 (0.56-1.39)       | 0.59             | 1.12 (0.75-1.66) | 0.58             |
| Chronic Kidney Disease (Y vs. N)                  | 1.32 (1.04-1.67)       | <b>0.02</b>      | 1.45 (1.16-1.80) | <b>0.001</b>     |
| Chronic Digestive Disorders (Y vs. N)             | 1.15 (1.01-1.31)       | <b>0.04</b>      | 1.43 (1.26-1.61) | <b>&lt;.0001</b> |
| Psychological Disorders (Y vs. N)                 | 1.00 (0.53-1.89)       | 0.99             | 1.44 (0.81-2.56) | 0.22             |
| Dementia (Y vs. N)                                | 1.31 (0.72-2.38)       | 0.37             | 1.15 (0.67-1.97) | 0.62             |
| Arthritis (Y vs. N)                               | 1.43 (1.28-1.61)       | <b>&lt;.0001</b> | 1.72 (1.54-1.91) | <b>&lt;.0001</b> |
| Asthma (Y vs. N)                                  | 1.25 (0.90-1.75)       | 0.19             | 1.43 (1.06-1.91) | <b>0.02</b>      |

1  
2  
3 Note. CI=confidence interval; OR=odds ratio. All analysis was conducted at a 5% significance  
4  
5 level.  
6  
7  
8  
9  
10  
11  
12  
13  
14  
15  
16  
17  
18  
19  
20  
21  
22  
23  
24  
25  
26  
27  
28  
29  
30  
31  
32  
33  
34  
35  
36  
37  
38  
39  
40  
41  
42  
43  
44  
45  
46  
47  
48  
49  
50  
51  
52  
53  
54  
55  
56  
57  
58  
59  
60

For peer review only

1  
2  
3  
4  
5  
6  
7  
8  
9  
10  
11  
12  
13  
14  
15  
16  
17  
18  
19  
20  
21  
22  
23  
24  
25  
26  
27  
28  
29  
30  
31  
32  
33  
34  
35  
36  
37  
38  
39  
40  
41  
42  
43  
44  
45  
46  
47  
48  
49  
50  
51  
52  
53  
54  
55  
56  
57  
58  
59  
60

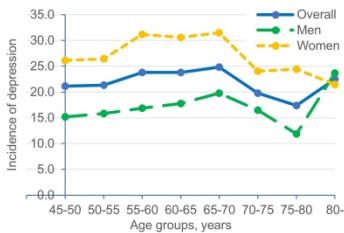

254x190mm (300 x 300 DPI)

**STROBE 2007 (v4) Statement—Checklist of items that should be included in reports of *cohort studies***

| Section/Topic                | Item # | Recommendation                                                                                                                                                                       | Reported on page # |
|------------------------------|--------|--------------------------------------------------------------------------------------------------------------------------------------------------------------------------------------|--------------------|
| <b>Title and abstract</b>    | 1      | (a) Indicate the study's design with a commonly used term in the title or the abstract                                                                                               | 3                  |
|                              |        | (b) Provide in the abstract an informative and balanced summary of what was done and what was found                                                                                  | 3                  |
| <b>Introduction</b>          |        |                                                                                                                                                                                      |                    |
| Background/rationale         | 2      | Explain the scientific background and rationale for the investigation being reported                                                                                                 | 6-7                |
| Objectives                   | 3      | State specific objectives, including any prespecified hypotheses                                                                                                                     | 7                  |
| <b>Methods</b>               |        |                                                                                                                                                                                      |                    |
| Study design                 | 4      | Present key elements of study design early in the paper                                                                                                                              | 8                  |
| Setting                      | 5      | Describe the setting, locations, and relevant dates, including periods of recruitment, exposure, follow-up, and data collection                                                      | 8-9                |
| Participants                 | 6      | (a) Give the eligibility criteria, and the sources and methods of selection of participants. Describe methods of follow-up                                                           | 8                  |
|                              |        | (b) For matched studies, give matching criteria and number of exposed and unexposed                                                                                                  | NA                 |
| Variables                    | 7      | Clearly define all outcomes, exposures, predictors, potential confounders, and effect modifiers. Give diagnostic criteria, if applicable                                             | 9-11               |
| Data sources/<br>measurement | 8*     | For each variable of interest, give sources of data and details of methods of assessment (measurement). Describe comparability of assessment methods if there is more than one group | 9                  |
| Bias                         | 9      | Describe any efforts to address potential sources of bias                                                                                                                            | 17                 |
| Study size                   | 10     | Explain how the study size was arrived at                                                                                                                                            | 8                  |
| Quantitative variables       | 11     | Explain how quantitative variables were handled in the analyses. If applicable, describe which groupings were chosen and why                                                         | 12                 |
| Statistical methods          | 12     | (a) Describe all statistical methods, including those used to control for confounding                                                                                                | 12                 |
|                              |        | (b) Describe any methods used to examine subgroups and interactions                                                                                                                  | NA                 |
|                              |        | (c) Explain how missing data were addressed                                                                                                                                          | NA                 |
|                              |        | (d) If applicable, explain how loss to follow-up was addressed                                                                                                                       | NA                 |
|                              |        | (e) Describe any sensitivity analyses                                                                                                                                                | NA                 |
| <b>Results</b>               |        |                                                                                                                                                                                      |                    |

|                          |     |                                                                                                                                                                                                              |           |
|--------------------------|-----|--------------------------------------------------------------------------------------------------------------------------------------------------------------------------------------------------------------|-----------|
| Participants             | 13* | (a) Report numbers of individuals at each stage of study—eg numbers potentially eligible, examined for eligibility, confirmed eligible, included in the study, completing follow-up, and analysed            | 8         |
|                          |     | (b) Give reasons for non-participation at each stage                                                                                                                                                         | NA        |
|                          |     | (c) Consider use of a flow diagram                                                                                                                                                                           | NA        |
| Descriptive data         | 14* | (a) Give characteristics of study participants (eg demographic, clinical, social) and information on exposures and potential confounders                                                                     | 13        |
|                          |     | (b) Indicate number of participants with missing data for each variable of interest                                                                                                                          | NA        |
|                          |     | (c) Summarise follow-up time (eg, average and total amount)                                                                                                                                                  | 8         |
| Outcome data             | 15* | Report numbers of outcome events or summary measures over time                                                                                                                                               | NA        |
| Main results             | 16  | (a) Give unadjusted estimates and, if applicable, confounder-adjusted estimates and their precision (eg, 95% confidence interval). Make clear which confounders were adjusted for and why they were included | 11, 13-14 |
|                          |     | (b) Report category boundaries when continuous variables were categorized                                                                                                                                    | NA        |
|                          |     | (c) If relevant, consider translating estimates of relative risk into absolute risk for a meaningful time period                                                                                             | NA        |
| Other analyses           | 17  | Report other analyses done—eg analyses of subgroups and interactions, and sensitivity analyses                                                                                                               | NA        |
| <b>Discussion</b>        |     |                                                                                                                                                                                                              |           |
| Key results              | 18  | Summarise key results with reference to study objectives                                                                                                                                                     | 14        |
| <b>Limitations</b>       |     |                                                                                                                                                                                                              |           |
| Interpretation           | 20  | Give a cautious overall interpretation of results considering objectives, limitations, multiplicity of analyses, results from similar studies, and other relevant evidence                                   | 17        |
| Generalisability         | 21  | Discuss the generalisability (external validity) of the study results                                                                                                                                        | 17        |
| <b>Other information</b> |     |                                                                                                                                                                                                              |           |
| Funding                  | 22  | Give the source of funding and the role of the funders for the present study and, if applicable, for the original study on which the present article is based                                                | 20        |

\*Give information separately for cases and controls in case-control studies and, if applicable, for exposed and unexposed groups in cohort and cross-sectional studies.

**Note:** An Explanation and Elaboration article discusses each checklist item and gives methodological background and published examples of transparent reporting. The STROBE checklist is best used in conjunction with this article (freely available on the Web sites of PLoS Medicine at <http://www.plosmedicine.org/>, Annals of Internal Medicine at <http://www.annals.org/>, and Epidemiology at <http://www.epidem.com/>). Information on the STROBE Initiative is available at [www.strobe-statement.org](http://www.strobe-statement.org).
